# Supplementary material
Source: publisher figshare collection journal article supplement (https://gsapubs.figshare.com/articles/dataset/_/14925234)
Supplement: Supplementary file 1 [file 1]

## **Jurassic Arc: Reconstructing the lost world of eastern Gondwana**

Elliot.K. Foley\*, R.A. Henderson, E.M. Roberts, A.I.S. Kemp, C.N. Todd, E.M. Knutsen, C. Fisher, C.C. Wainman and Carl Spandler.

Department of Geosciences, James Cook University Townsville, Queensland 4811, Australia

\*E-mail contact: [elliott.foley@my.jcu.edu.au](mailto:elliott.foley@my.jcu.edu.au)

### **SUPPLEMENTARY PAPERS**

*Geology* (2021)

---

#### **SUPPLEMENTARY PAPERS**

**Supplementary file A.** List of samples used for U-Pb geochronology in this study (PDF).

**Supplementary file B.** U-Pb geochronological datasets (Excel file).

**Supplementary file C.** List of samples used for Lu-Hf analysis in this study (PDF).

**Supplementary file D.** Lu-Hf isotope analytical datasets (Excel file).

**Supplementary file E.** Analytical setup and procedures used (PDF).

**Supplementary file F.** Crustal addition rate calculations (PDF).

**Supplementary file G.** Supplementary Figure 1. Plotted  $\epsilon_{\text{Hf}}$  data with isotopic evolution curves (PDF).

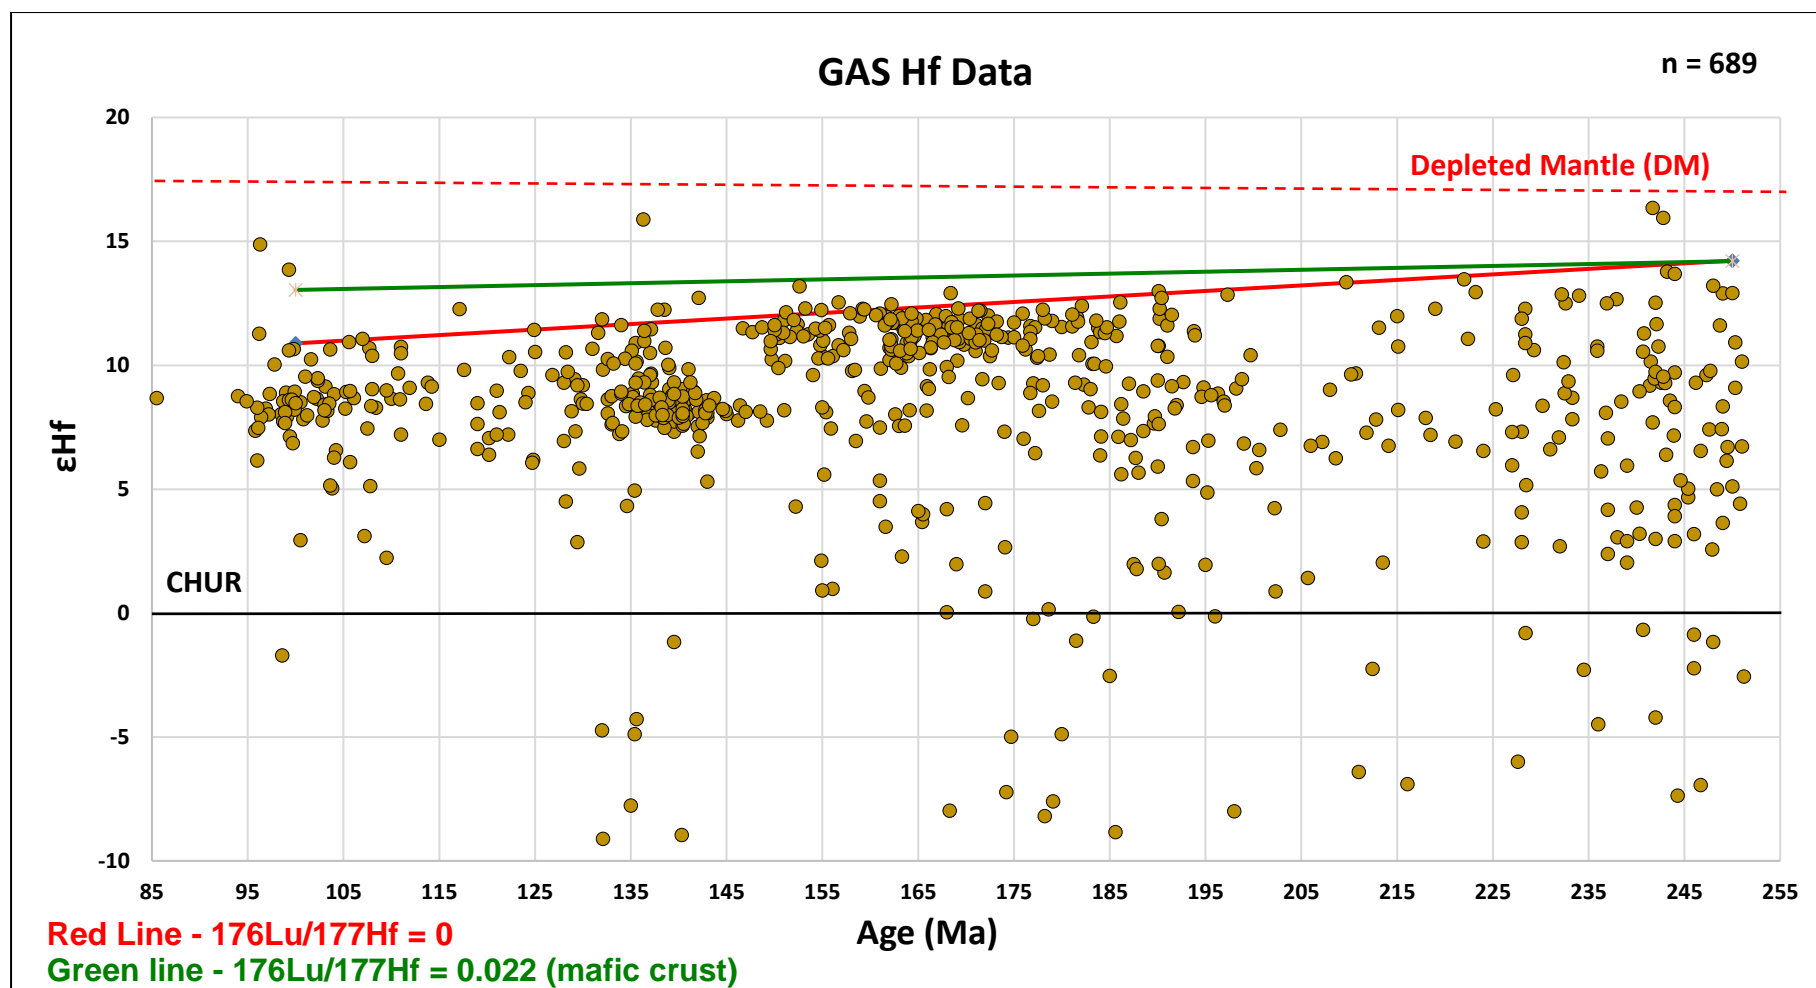

Supplementary Figure 1. Plot of  $\epsilon\text{Hf}$  data against time for representative Mesozoic detrital zircons analysed from the GAS sedimentary succession. Red and green isotopic evolutionary curves for values of  $\text{Lu}^{176}/\text{Hf}^{177} = 0$  and  $\text{Lu}^{176}/\text{Hf}^{177} = 0.022$  respectively also illustrated, to highlight that reworking of a crustal reservoir is unlikely to produce such a juvenile  $\epsilon\text{Hf}$  array.
