# Supplementary material
Source: publisher figshare collection journal article supplement (https://gsapubs.figshare.com/articles/dataset/_/14925234)
Supplement: Supplementary file 1 [file 1]

## Sheet: PlotDat8
Source sheet	U-Pb Geochron Data	0.2	195.209	1	194.2	3.3	0.85	190.9
Plot name	Average8	3.8	195.209	2	195.4	2.8	1.15	190.9
Plot Type	15			3	196	3.4	1.15	197.5
1st free col	8			IsoLine	IsoLine	IsoLine	0.85	197.5
Sigma Level	2						0.85	190.9
Absolute Errs	TRUE						ErrBox	ErrBox
Symbol Type	1						1.85	192.6
Inverse Plot	FALSE						2.15	192.6
Color Plot	TRUE						2.15	198.2
3D plot	FALSE						1.85	198.2
Linear	FALSE						1.85	192.6
Data Range	S993:T995						ErrBox	ErrBox
Filled Symbols	TRUE						2.85	192.6
ConcAge	FALSE						3.15	192.6
ConcSwap	FALSE						3.15	199.4
1st Symbol-row	1						2.85	199.4
							2.85	192.6
							ErrBox	ErrBox

## Sheet: U-Pb Geochron Data
	U-Pb LA-ICPMS detrital zircon data
	Sample Location: Porcupine Gorge (sample name: PGF01; Porcupine Gorge, Queensland)
	Formation: Porcupine Gorge Formation
	Sample #	Th (PPM)	U (PPM)	Th/U	Pb207	±	Pb206	±	Error	Pb207	±	Pb206	± 2σ	Pb207	± 2σ	Pb207	± 2σ	Preferred	± 2σ	Pb-Pb/U-Pb Discordance (%)	U-Pb/U-Pb Discordance (%)						Legend
	PGF01				/U235	2σ	/U238	2σ	Corr.	/Pb206	2σ	/U238 (Ma)	(Ma)	/U235	(Ma)	/Pb206	(Ma)	Age	(Ma)
	PGF01-35	-	-	-	0.25242	0.01366	0.036	0.00098	0.503033	0.05086	0.00272	228	6.04	228.5	11.08	234.6	121.36	227.951	6.04	2.8133	0.218818				Mesozoic dated grains
	PGF01-30	-	-	-	0.2665	0.02194	0.0362	0.0011	0.369101	0.05341	0.00446	229.2	6.9	239.9	17.6	346	183.36	228.48	6.9	33.7572	4.46019				Proterozoic - Paleozoic dated grains
	PGF01-09	-	-	-	0.26411	0.01722	0.03669	0.00102	0.426387	0.05222	0.00344	232.3	6.3	238	13.84	294.9	146.7	231.879	6.3	21.2275	2.39496				All grains older then 1Ga
	PGF01-64	-	-	-	0.2721	0.01606	0.03747	0.00102	0.461211	0.05267	0.0031	237.1	6.4	244.4	12.82	314.5	130.82	236.619	6.4	24.6105	2.98691			Notes:
	PGF01-57	-	-	-	0.27123	0.01568	0.03756	0.00102	0.469749	0.05238	0.00302	237.7	6.36	243.7	12.52	302.2	128.48	237.266	6.36	21.3435	2.46204			*Age is calculated by error propagation and included errors
	PGF01-40	-	-	-	0.26622	0.01858	0.03762	0.00106	0.403722	0.05133	0.00362	238.1	6.64	239.7	14.9	255.5	158.02	237.949	6.64	6.81018	0.667501			*Spot size: 30µm
	PGF01-73	-	-	-	0.26806	0.01498	0.03772	0.00102	0.483892	0.05154	0.00286	238.7	6.38	241.1	11.98	265.1	124.62	238.512	6.38	9.95851	0.995438			*Energy levels at 3 J/cm2 at 193 nm
	PGF01-96	-	-	-	0.26841	0.01718	0.03776	0.00104	0.430305	0.05155	0.00332	239	6.5	241.4	13.76	265.5	144.08	238.759	6.5	9.98117	0.9942			*All grains older then 1000 Ma, preferred ages are based on Pb207/Pb206
	PGF01-02	-	-	-	0.2703	0.01104	0.03802	0.00096	0.61821	0.05157	0.00204	240.5	6.02	242.9	8.84	266.2	89.3	240.377	6.02	9.6544	0.988061			*Grains which exhibited greater then ≥ 15% discordance were excluded
	PGF01-05	-	-	-	0.26837	0.01458	0.03819	0.00106	0.510896	0.05098	0.00272	241.6	6.6	241.4	11.66	240	120.94	241.615	6.6	-0.666667	-0.08285			*1 Age correction completed by Isoplot (AGE7Corr)
	PGF01-26	-	-	-	0.27806	0.01298	0.03829	0.00098	0.548283	0.05267	0.00242	242.2	6.06	249.1	10.3	314.5	102.98	241.735	6.06	22.9889	2.76997
	PGF01-68	-	-	-	0.2704	0.013	0.03851	0.001	0.540119	0.05092	0.0024	243.6	6.22	243	10.38	237.2	107.08	243.633	6.22	-2.69815	-0.246914
	PGF01-65	-	-	-	0.27229	0.01638	0.03859	0.00106	0.456614	0.05118	0.00308	244.1	6.56	244.5	13.08	248.9	135.48	244.055	6.56	1.92849	0.163599
	PGF01-36	-	-	-	0.2692	0.01672	0.03891	0.00108	0.446891	0.05018	0.00312	246.1	6.74	242.1	13.38	203.4	140.84	246.357	6.74	-20.9931	-1.65221
	PGF01-38	-	-	-	0.29713	0.02498	0.03944	0.0012	0.361908	0.05464	0.00466	249.4	7.5	264.2	19.56	397.5	184.58	248.3	7.5	37.2579	5.60182
	PGF01-48	-	-	-	0.28607	0.01662	0.03942	0.00106	0.46284	0.05264	0.00306	249.3	6.56	255.5	13.12	313.1	129.58	248.79	6.56	20.3769	2.42661
	PGF01-43	-	-	-	0.31299	0.02112	0.03982	0.00112	0.416825	0.05701	0.00388	251.7	6.98	276.5	16.34	491.5	147.94	249.928	6.98	48.7894	8.96926
	PGF01-67	-	-	-	0.2877	0.01374	0.03993	0.00104	0.545365	0.05226	0.00246	252.4	6.42	256.7	10.84	296.8	105.22	252.087	6.42	14.9596	1.67511
	PGF01-85	-	-	-	0.28439	0.01336	0.04047	0.00106	0.557546	0.05096	0.00234	255.8	6.52	254.1	10.56	239.2	104.28	255.863	6.52	-6.9398	-0.669028
	PGF01-66	-	-	-	0.2995	0.0224	0.04065	0.00126	0.414437	0.05344	0.004	256.8	7.78	266	17.5	347.5	164.52	256.202	7.78	26.1007	3.45865
	PGF01-83	-	-	-	0.2967	0.02684	0.04154	0.0013	0.345949	0.0518	0.00476	262.4	8.02	263.8	21.02	276.8	203.22	262.268	8.02	5.20231	0.530705
	PGF01-20	-	-	-	0.32718	0.01848	0.04186	0.00112	0.4737	0.0567	0.0032	264.3	6.98	287.4	14.14	479.2	122.24	262.669	6.98	44.8456	8.03758
	PGF01-12	-	-	-	0.302	0.01812	0.04166	0.00118	0.472076	0.05258	0.00314	263.1	7.32	268	14.12	310.7	132.6	262.763	7.32	15.3202	1.82836
	PGF01-10	-	-	-	0.30193	0.016	0.04213	0.00112	0.501664	0.05198	0.00272	266	6.98	267.9	12.48	284.6	117.78	265.885	6.98	6.53549	0.70922
	PGF01-72	-	-	-	0.33519	0.01956	0.04244	0.00114	0.460311	0.05729	0.00334	267.9	7.12	293.5	14.86	502.1	126.92	266.066	7.12	46.6441	8.72232
	PGF01-06	-	-	-	0.31075	0.02334	0.04283	0.00126	0.391681	0.05263	0.004	270.4	7.74	274.8	18.08	312.7	168.56	270.028	7.74	13.5273	1.60116
	PGF01-33	-	-	-	0.35403	0.01872	0.04419	0.0012	0.51356	0.05811	0.00304	278.8	7.4	307.7	14.04	533.3	113.38	276.609	7.4	47.7217	9.39227
	PGF01-37	-	-	-	0.31624	0.01542	0.04407	0.00116	0.539818	0.05205	0.0025	278	7.12	279	11.9	287.5	107.66	277.937	7.12	3.30435	0.358423
	PGF01-93	-	-	-	0.32234	0.01764	0.04452	0.0012	0.49254	0.05251	0.00286	280.8	7.34	283.7	13.54	307.8	121.2	280.577	7.34	8.77193	1.02221
	PGF01-52	-	-	-	0.37725	0.0181	0.04504	0.0012	0.555307	0.06075	0.00284	284	7.46	325	13.34	630.3	99.16	280.937	7.46	54.9421	12.6154
	PGF01-31	-	-	-	0.32912	0.02156	0.04465	0.00124	0.423941	0.05346	0.00352	281.6	7.64	288.9	16.48	348.4	145.48	281.057	7.64	19.1734	2.52683
	PGF01-34	-	-	-	0.33866	0.01528	0.04491	0.00116	0.572474	0.05469	0.00242	283.2	7.12	296.2	11.6	400.1	95.9	282.243	7.12	29.2177	4.38893
	PGF01-84	-	-	-	0.32768	0.0211	0.04494	0.00126	0.435417	0.05289	0.00342	283.4	7.8	287.8	16.14	323.9	143.26	283.055	7.8	12.5039	1.52884
	PGF01-86	-	-	-	0.3613	0.02842	0.04589	0.00146	0.404463	0.05711	0.0045	289.2	8.96	313.2	21.2	495.2	170.44	287.457	8.96	41.5994	7.66284
	PGF01-80	-	-	-	0.33631	0.01794	0.04583	0.00122	0.499031	0.05322	0.0028	288.9	7.58	294.4	13.62	338.3	117.36	288.465	7.58	14.6024	1.86821
	PGF01-95	-	-	-	0.3355	0.02612	0.04639	0.00138	0.382097	0.05246	0.00412	292.3	8.5	293.8	19.86	305.4	174.2	292.212	8.5	4.28946	0.510551
	PGF01-04	-	-	-	0.35646	0.01406	0.04658	0.0012	0.653141	0.05551	0.0021	293.5	7.34	309.6	10.52	432.4	82.16	292.294	7.34	32.123	5.20026
	PGF01-94	-	-	-	0.34901	0.02182	0.04667	0.00134	0.459251	0.05423	0.00336	294.1	8.22	304	16.42	380.7	136.3	293.312	8.22	22.7476	3.25658
	PGF01-79	-	-	-	0.37344	0.0241	0.0477	0.00134	0.435302	0.05679	0.00368	300.4	8.2	322.2	17.82	482.8	141.5	298.749	8.2	37.7796	6.76598
	PGF01-19	-	-	-	0.3572	0.02814	0.04796	0.00144	0.381128	0.05402	0.00432	302	8.88	310.1	21.06	371.7	173.86	301.378	8.88	18.7517	2.61206
	PGF01-71	-	-	-	0.39549	0.02184	0.04834	0.00128	0.479497	0.05934	0.00328	304.3	7.92	338.4	15.9	579.5	117.54	301.749	7.92	47.4892	10.0768
	PGF01-27	-	-	-	0.39685	0.02518	0.04862	0.00142	0.460303	0.05921	0.00374	306	8.78	339.4	18.3	574.7	134.36	303.52	8.78	46.7548	9.8409
	PGF01-32	-	-	-	0.40828	0.02948	0.04892	0.00142	0.402006	0.06055	0.00442	307.9	8.74	347.6	21.26	623.3	153.86	304.861	8.74	50.6016	11.4212
	PGF01-47	-	-	-	0.40659	0.02468	0.0493	0.00134	0.447785	0.05982	0.00364	310.2	8.26	346.4	17.82	597	129.48	307.471	8.26	48.0402	10.4503
	PGF01-45	-	-	-	0.38742	0.02062	0.0497	0.00132	0.499012	0.05654	0.003	312.7	8.1	332.5	15.1	472.9	115.68	311.183	8.1	33.8761	5.95489
	PGF01-91	-	-	-	0.41951	0.02388	0.05002	0.00136	0.477643	0.06083	0.00346	314.6	8.32	355.7	17.08	633.4	120.04	311.506	8.32	50.3315	11.5547
	PGF01-24	-	-	-	0.36162	0.01662	0.04992	0.00132	0.575335	0.05255	0.00234	314	8.1	313.4	12.38	309.2	100	314.071	8.1	-1.55239	-0.191449
	PGF01-01	-	-	-	0.37017	0.03564	0.05028	0.00174	0.359433	0.05341	0.00518	316.3	10.64	319.8	26.4	346.2	211.7	315.969	10.64	8.63663	1.09443
	PGF01-82	-	-	-	0.38892	0.0303	0.05055	0.0015	0.38088	0.05581	0.0044	317.9	9.24	333.6	22.16	444.3	170.38	316.707	9.24	28.4492	4.70624
	PGF01-23	-	-	-	0.36948	0.0184	0.05062	0.00134	0.531564	0.05294	0.0026	318.3	8.22	319.3	13.64	326.3	109.32	318.255	8.22	2.45173	0.313185
	PGF01-03	-	-	-	0.3618	0.02624	0.05056	0.00154	0.41997	0.05191	0.00378	318	9.46	313.6	19.56	281.4	161.84	318.284	9.46	-13.0064	-1.40306
	PGF01-81	-	-	-	0.3981	0.03556	0.05095	0.00162	0.35596	0.05669	0.00514	320.3	9.94	340.3	25.82	478.6	195.82	318.831	9.94	33.0756	5.87717
	PGF01-76	-	-	-	0.42657	0.02654	0.05198	0.00152	0.469999	0.05952	0.00366	326.7	9.26	360.7	18.9	586	131.06	324.047	9.26	44.2491	9.42612
	PGF01-39	-	-	-	0.41417	0.02936	0.05196	0.0015	0.407235	0.0578	0.00414	326.6	9.16	351.9	21.08	522.1	153.98	324.61	9.16	37.4449	7.18954
	PGF01-61	-	-	-	0.38985	0.02222	0.05217	0.00142	0.477552	0.0542	0.00308	327.9	8.7	334.3	16.24	379	125.02	327.341	8.7	13.4828	1.91445
	PGF01-50	-	-	-	0.4169	0.02248	0.05242	0.00138	0.488222	0.05768	0.0031	329.4	8.5	353.8	16.12	517.5	116.48	327.487	8.5	36.3478	6.89655
	PGF01-75	-	-	-	0.38596	0.01794	0.05219	0.00136	0.560624	0.05364	0.00244	328	8.28	331.4	13.14	355.6	101.42	327.689	8.28	7.76153	1.02595
	PGF01-89	-	-	-	0.40504	0.023	0.05242	0.00146	0.490485	0.05603	0.00314	329.4	8.9	345.3	16.62	453.4	122.36	328.15	8.9	27.3489	4.60469
	PGF01-62	-	-	-	0.41945	0.01986	0.05591	0.00146	0.551524	0.05442	0.00252	350.7	8.88	355.7	14.2	388.2	102.16	350.318	8.88	9.65997	1.40568
	PGF01-60	-	-	-	0.44835	0.02312	0.05943	0.00156	0.509036	0.05472	0.0028	372.2	9.48	376.1	16.22	400.1	113.4	371.845	9.48	6.97326	1.03696
	PGF01-99	-	-	-	0.45491	0.02298	0.05997	0.00164	0.541359	0.05501	0.0027	375.5	9.94	380.7	16.04	412.6	106.76	375.031	9.94	8.99176	1.3659
	PGF01-13	-	-	-	0.47187	0.02228	0.06087	0.00164	0.570621	0.05623	0.00258	380.9	9.92	392.5	15.36	460.6	101.16	379.994	9.92	17.3035	2.95541
	PGF01-92	-	-	-	0.46374	0.02542	0.06144	0.00168	0.498835	0.05474	0.00296	384.4	10.24	386.9	17.64	401.6	117.42	384.182	10.24	4.28287	0.646162
	PGF01-98	-	-	-	0.50321	0.03606	0.06492	0.0019	0.408412	0.05621	0.00406	405.5	11.54	413.9	24.36	460.1	156.32	404.803	11.54	11.867	2.02948
	PGF01-74	-	-	-	0.51337	0.02386	0.06573	0.00172	0.563021	0.05665	0.00258	410.4	10.4	420.7	16	477.2	99.58	409.539	10.4	13.9983	2.4483
	PGF01-07	-	-	-	0.51099	0.02528	0.06621	0.00172	0.525098	0.05598	0.00276	413.3	10.36	419.1	17	451.3	107.18	412.806	10.36	8.42012	1.38392
	PGF01-59	-	-	-	0.50398	0.02186	0.06663	0.0017	0.588223	0.05486	0.00232	415.8	10.28	414.4	14.76	406.5	92.64	415.935	10.28	-2.28782	-0.337838
	PGF01-56	-	-	-	0.5184	0.02244	0.06721	0.00172	0.591203	0.05595	0.00236	419.3	10.4	424.1	15.02	449.9	91.82	418.933	10.4	6.80151	1.13181
	PGF01-54	-	-	-	0.54042	0.02936	0.06742	0.0018	0.491427	0.05814	0.00314	420.6	10.84	438.7	19.36	534.5	117.92	419.105	10.84	21.3096	4.12583
	PGF01-77	-	-	-	0.51867	0.02774	0.06742	0.00178	0.493646	0.0558	0.00298	420.6	10.74	424.3	18.54	444.1	116	420.292	10.74	5.2916	0.872025
	PGF01-08	-	-	-	0.57658	0.03076	0.07063	0.00192	0.509548	0.05921	0.00314	439.9	11.52	462.3	19.8	574.9	112.94	438.085	11.52	23.4823	4.84534
	PGF01-63	-	-	-	0.55346	0.0267	0.0714	0.00186	0.539995	0.05622	0.00266	444.6	11.24	447.3	17.46	460.5	104.34	444.362	11.24	3.45277	0.603622
	PGF01-21	-	-	-	0.55717	0.0384	0.07182	0.00214	0.432339	0.05628	0.00388	447.1	12.86	449.7	25.04	462.6	149.9	446.89	12.86	3.35063	0.578163
	PGF01-53	-	-	-	0.55993	0.02972	0.07218	0.00194	0.506372	0.05627	0.00296	449.2	11.66	451.5	19.34	462.2	115.42	449.088	11.66	2.81264	0.509413
	PGF01-18	-	-	-	0.63714	0.03102	0.07633	0.00204	0.548944	0.06054	0.0029	474.2	12.22	500.5	19.24	623.1	101.44	471.914	12.22	23.8966	5.25475
	PGF01-58	-	-	-	0.59599	0.02962	0.07601	0.00202	0.53473	0.05687	0.00278	472.3	12.08	474.7	18.84	485.9	106.24	472.056	12.08	2.79893	0.505582
	PGF01-28	-	-	-	0.60394	0.03232	0.07728	0.00214	0.517451	0.05669	0.00298	479.8	12.76	479.7	20.46	478.8	114.64	479.872	12.76	-0.208855	-0.0208464
	PGF01-22	-	-	-	0.64532	0.02418	0.07981	0.00202	0.675481	0.05865	0.00208	495	12.1	505.6	14.92	554.2	77.68	494.065	12.1	10.6821	2.09652
	PGF01-15	-	-	-	2.27009	0.08954	0.20338	0.00506	0.630766	0.08096	0.0031	1193.5	27.12	1203	27.8	1220.5	74.46	1220.5	27.12	2.21221	0.789692
	PGF01-88	-	-	-	2.39879	0.14816	0.2031	0.00564	0.449604	0.08566	0.0053	1192	30.22	1242.2	44.26	1330.5	117.62	1330.5	30.22	10.4096	4.04122
	PGF01-78	-	-	-	3.55373	0.14242	0.26993	0.00684	0.632293	0.09549	0.00368	1540.5	34.76	1539.3	31.76	1537.7	71.7	1537.7	34.76	-0.18209	-0.0779575
	PGF01-25	-	-	-	3.4333	0.14234	0.26067	0.0068	0.62922	0.09554	0.0038	1493.3	34.8	1512.1	32.6	1538.7	73.96	1538.7	34.8	2.95054	1.2433
	PGF01-46	-	-	-	3.8014	0.14588	0.2805	0.00706	0.655873	0.0983	0.00362	1593.9	35.5	1593	30.86	1592	68.02	1592	35.5	-0.119347	-0.0564972
	PGF01-14	-	-	-	3.74845	0.14118	0.276	0.00708	0.681087	0.09851	0.00352	1571.2	35.76	1581.8	30.18	1596.2	66.12	1596.2	35.76	1.56622	0.670123
	PGF01-42	-	-	-	4.06367	0.15572	0.29879	0.00748	0.653295	0.09864	0.00364	1685.3	37.08	1647	31.22	1598.6	68.04	1598.6	37.08	-5.4235	-2.32544
	PGF01-17	-	-	-	4.00772	0.14296	0.29464	0.0074	0.704081	0.09866	0.00332	1664.7	36.84	1635.8	28.98	1599	62.22	1599	36.84	-4.10882	-1.76672
	PGF01-100	-	-	-	3.51681	0.15916	0.25613	0.00682	0.588354	0.09958	0.00436	1470	34.98	1531	35.78	1616.3	80.3	1616.3	34.98	9.05154	3.98432
	PGF01-97	-	-	-	4.09775	0.19246	0.29266	0.00774	0.563096	0.10155	0.00466	1654.8	38.58	1653.9	38.34	1652.7	83.74	1652.7	38.58	-0.127065	-0.0544168
	PGF01-44	-	-	-	9.25406	0.3928	0.40873	0.01032	0.594845	0.16422	0.00682	2209.1	47.22	2363.5	38.9	2499.6	69.1	2499.6	47.22	11.6219	6.53268
	U-Pb LA-ICPMS detrital zircon data
	Sample Location: GSQ Hughenden 7 (sample name: H7Bx_59; Hughenden, Queensland)
	Formation: Hooray Sandstone
	Sample #	Th (PPM)	U (PPM)	Th/U	Pb207	±	Pb206	±	Error	Pb207	±	Pb206	± 2σ	Pb207	± 2σ	Pb207	± 2σ	Preferred	± 2σ	Pb-Pb/U-Pb Discordance (%)	U-Pb/U-Pb Discordance (%)
	H7Bx_59				/U235	2σ	/U238	2σ	Corr.	/Pb206	2σ	/U238 (Ma)	(Ma)	/U235	(Ma)	/Pb206	(Ma)	Age	(Ma)
	H7Bx_59_101				0.12985	0.01598	0.01995	0.0007	0.285115	0.04721	0.0059	127.558	4.48	124	14.36	59.3	285.88	127.558	4.48	-115.106	-2.86905
	H7Bx_59_53	-	-	-	0.14451	0.03018	0.02033	0.00112	0.263791	0.05157	0.011	129.262	7.06	137.1	26.78	266.6	454.44	129.262	7.06	51.5145	5.71666
	H7Bx_59_67	-	-	-	0.14626	0.01296	0.02041	0.00068	0.375999	0.05197	0.00462	129.702	4.24	138.6	11.48	284.2	196.6	129.702	4.24	54.3622	6.41956
	H7Bx_59_77	-	-	-	0.15277	0.0131	0.02082	0.00068	0.380886	0.05322	0.00454	132.083	4.32	144.4	11.54	338	187.6	132.083	4.32	60.9223	8.53011
	H7Bx_59_9	-	-	-	0.1459	0.0142	0.02117	0.0007	0.339738	0.05002	0.005	134.829	4.46	138.3	12.58	195.7	224.42	134.829	4.46	31.1044	2.50997
	H7Bx_59_73	-	-	-	0.12578	0.02282	0.02117	0.00098	0.255153	0.04311	0.00788	135.997	6.24	120.3	20.58	0.1	102.6	135.997	6.24	-135897	-13.0479
	H7Bx_59_30	-	-	-	0.16606	0.01262	0.02421	0.00072	0.39133	0.04977	0.00382	154.086	4.54	156	10.98	184.1	174.08	154.086	4.54	16.3031	1.22698
	H7Bx_59_56	-	-	-	0.17936	0.01274	0.02633	0.00078	0.417061	0.04942	0.0035	167.537	4.9	167.5	10.98	167.7	161.32	167.537	4.9	0.0973038	-0.021983
	H7Bx_59_80	-	-	-	0.19366	0.01438	0.02743	0.00086	0.422234	0.05122	0.00374	174.083	5.38	179.7	12.22	250.8	163.3	174.083	5.38	30.5889	3.12572
	H7Bx_59_66	-	-	-	0.28876	0.0216	0.03616	0.0011	0.406675	0.05792	0.0043	226.954	6.88	257.6	17.02	526.3	159.42	226.954	6.88	56.8774	11.8966
	H7Bx_59_8	-	-	-	0.29811	0.01494	0.03724	0.001	0.535817	0.05809	0.00294	233.606	6.16	264.9	11.7	532.5	109.64	233.606	6.16	56.1304	11.8136
	H7Bx_59_43	-	-	-	0.26451	0.0195	0.0381	0.00114	0.40587	0.05036	0.00372	241.237	7.08	238.3	15.66	211.5	167.04	241.237	7.08	-14.06	-1.23242
	H7Bx_59_62	-	-	-	0.24792	0.0411	0.03813	0.0018	0.284758	0.04719	0.0079	242.368	11.16	224.9	33.44	58.6	377.66	242.368	11.16	-313.597	-7.76702
	H7Bx_59_42	-	-	-	0.28519	0.0191	0.03869	0.00116	0.447672	0.05349	0.00356	243.982	7.26	254.8	15.1	349.5	146.88	243.982	7.26	30.1911	4.24559
	H7Bx_59_88	-	-	-	0.29372	0.02702	0.03878	0.00134	0.375617	0.05497	0.005	244.095	8.34	261.5	21.2	410.8	196.44	244.095	8.34	40.5805	6.65574
	H7Bx_59_70	-	-	-	0.29099	0.01994	0.03897	0.00124	0.464349	0.05418	0.00356	245.517	7.68	259.3	15.68	378.6	144.26	245.517	7.68	35.1514	5.31554
	H7Bx_59_55	-	-	-	0.28116	0.0202	0.0393	0.00124	0.439169	0.05191	0.00366	248.266	7.66	251.6	16	281.5	157.48	248.266	7.66	11.8061	1.32517
	H7Bx_59_12	-	-	-	0.2927	0.0151	0.03952	0.00106	0.519918	0.05376	0.00278	249.069	6.62	260.7	11.86	360.7	114.96	249.069	6.62	30.9485	4.46156
	H7Bx_59_100				0.27468	0.02142	0.03946	0.00118	0.383471	0.05046	0.00392	249.71	7.26	246.4	17.06	216.4	175.12	249.71	7.26	-15.3928	-1.34335
	H7Bx_59_71	-	-	-	0.27367	0.03018	0.03946	0.00154	0.353893	0.05032	0.0054	249.753	9.54	245.6	24.06	209.6	239.88	249.753	9.54	-19.157	-1.69098
	H7Bx_59_48	-	-	-	0.28481	0.01656	0.03993	0.00116	0.499636	0.05175	0.00294	252.246	7.24	254.5	13.08	274.4	127.58	252.246	7.24	8.07372	0.885775
	H7Bx_59_81	-	-	-	0.31096	0.02584	0.04114	0.00138	0.40367	0.05483	0.00444	258.806	8.48	274.9	20.02	405.4	174.94	258.806	8.48	36.1604	5.85456
	H7Bx_59_78	-	-	-	0.30737	0.01812	0.04267	0.00128	0.508851	0.05226	0.00294	269.155	7.9	272.1	14.08	296.7	125.7	269.155	7.9	9.28368	1.0822
	H7Bx_59_87	-	-	-	0.32004	0.02092	0.04314	0.0013	0.461005	0.05381	0.00338	271.562	8.02	281.9	16.1	363.2	138.56	271.562	8.02	25.2308	3.66739
	H7Bx_59_59	-	-	-	0.29522	0.02014	0.04324	0.00132	0.447481	0.04954	0.00332	273.615	8.18	262.7	15.8	173.2	152.44	273.615	8.18	-57.9761	-4.15475
	H7Bx_59_19	-	-	-	0.32184	0.0166	0.04368	0.00116	0.514882	0.05346	0.00276	275.034	7.2	283.3	12.76	348.3	115	275.034	7.2	21.0355	2.91792
	H7Bx_59_69	-	-	-	0.31042	0.01954	0.04363	0.0013	0.473351	0.05162	0.00316	275.345	8.04	274.5	15.14	268.4	137.46	275.345	8.04	-2.58763	-0.307907
	H7Bx_59_58	-	-	-	0.32006	0.01814	0.04378	0.00126	0.507796	0.05303	0.00292	275.801	7.78	281.9	13.94	330.1	122.74	275.801	7.78	16.4494	2.16369
	H7Bx_59_14	-	-	-	0.34124	0.02756	0.04415	0.00136	0.381407	0.05608	0.00466	277.056	8.34	298.1	20.86	455.4	179.68	277.056	8.34	39.1619	7.05921
	H7Bx_59_64	-	-	-	0.34187	0.0211	0.04489	0.00136	0.490872	0.05525	0.0033	281.925	8.4	298.6	15.98	422.4	129.34	281.925	8.4	33.2564	5.58441
	H7Bx_59_5	-	-	-	0.31658	0.01904	0.04481	0.00122	0.452691	0.05127	0.00314	282.81	7.48	279.3	14.68	252.9	138.26	282.81	7.48	-11.8267	-1.25662
	H7Bx_59_44	-	-	-	0.33095	0.01604	0.04498	0.00124	0.568801	0.05337	0.00252	283.137	7.64	290.3	12.24	344.6	104.82	283.137	7.64	17.8361	2.46752
	H7Bx_59_10	-	-	-	0.36405	0.01662	0.04528	0.00118	0.570828	0.05834	0.00266	283.258	7.28	315.2	12.36	541.7	99.8	283.258	7.28	47.7094	10.1339
	H7Bx_59_11	-	-	-	0.34283	0.01824	0.04541	0.00124	0.513244	0.05479	0.00294	285.307	7.7	299.3	13.8	403.6	116.48	285.307	7.7	29.3095	4.67527
	H7Bx_59_38	-	-	-	0.36473	0.02826	0.04565	0.00142	0.401464	0.05799	0.00456	285.664	8.74	315.7	21.02	529	168.56	285.664	8.74	45.9992	9.51402
	H7Bx_59_84	-	-	-	0.34204	0.02416	0.04589	0.00148	0.456587	0.05409	0.00366	288.529	9.12	298.7	18.28	374.5	148.26	288.529	9.12	22.9563	3.40521
	H7Bx_59_98				0.32355	0.01908	0.04623	0.0013	0.476851	0.05079	0.00298	291.815	8.06	284.6	14.64	231.1	132.42	291.815	8.06	-26.272	-2.53499
	H7Bx_59_74	-	-	-	0.33902	0.02416	0.04731	0.00148	0.438972	0.05199	0.0036	298.094	9.08	296.4	18.32	285.1	154.76	298.094	9.08	-4.55761	-0.57144
	H7Bx_59_26	-	-	-	0.36366	0.02554	0.04772	0.0014	0.417736	0.05531	0.00396	299.417	8.58	314.9	19.02	425.1	154.54	299.417	8.58	29.5654	4.91667
	H7Bx_59_85	-	-	-	0.34607	0.01922	0.0482	0.00144	0.53793	0.05209	0.0027	303.581	8.8	301.8	14.5	289.5	116.56	303.581	8.8	-4.86391	-0.590134
	H7Bx_59_34	-	-	-	0.3629	0.03592	0.04875	0.00164	0.339876	0.054	0.00544	306.276	10.1	314.4	26.76	371	218.28	306.276	10.1	17.4458	2.58394
	H7Bx_59_91				0.3652	0.01568	0.04932	0.00128	0.604466	0.05374	0.00224	309.902	7.92	316.1	11.66	359.9	92.56	309.902	7.92	13.8922	1.96079
	H7Bx_59_22	-	-	-	0.40383	0.0302	0.04996	0.0015	0.401477	0.05866	0.00448	311.972	9.16	344.4	21.84	554.5	162.54	311.972	9.16	43.7382	9.41583
	H7Bx_59_54	-	-	-	0.38415	0.03842	0.05015	0.00176	0.350901	0.05558	0.0056	314.328	10.78	330.1	28.18	435.3	217.8	314.328	10.78	27.7905	4.77793
	H7Bx_59_94				0.36688	0.01774	0.05047	0.00132	0.540893	0.05275	0.0025	317.401	8.12	317.3	13.18	318.1	105.98	317.401	8.12	0.219858	-0.0317149
	H7Bx_59_21	-	-	-	0.42695	0.02084	0.05274	0.0014	0.543835	0.05873	0.00286	329.03	8.6	361	14.82	557.3	104.56	329.03	8.6	40.96	8.85598
	H7Bx_59_28	-	-	-	0.4081	0.02248	0.05272	0.00148	0.509632	0.05617	0.00308	329.941	9	347.5	16.2	458.7	119.54	329.941	9	28.0703	5.05284
	H7Bx_59_61	-	-	-	0.39562	0.02272	0.05267	0.00152	0.502516	0.05449	0.00304	330.312	9.28	338.5	16.52	391.4	122.52	330.312	9.28	15.6077	2.41905
	H7Bx_59_36	-	-	-	0.38402	0.01802	0.0528	0.00142	0.57313	0.05276	0.00242	331.814	8.66	330	13.22	318.5	102.7	331.814	8.66	-4.1801	-0.549577
	H7Bx_59_76	-	-	-	0.38063	0.0248	0.05339	0.00158	0.454201	0.05171	0.00326	335.89	9.72	327.5	18.24	272.6	141.62	335.89	9.72	-23.2173	-2.56191
	H7Bx_59_92				0.39634	0.02144	0.05355	0.00146	0.504007	0.05371	0.00288	336.061	8.92	339	15.6	358.9	118.58	336.061	8.92	6.36371	0.867062
	H7Bx_59_3	-	-	-	0.4162	0.02064	0.05469	0.00144	0.530942	0.05523	0.00276	342.461	8.82	353.3	14.8	421.4	108.74	342.461	8.82	18.7325	3.06792
	H7Bx_59_35	-	-	-	0.47583	0.02172	0.05881	0.00158	0.58857	0.0587	0.00262	366.254	9.6	395.2	14.94	555.9	95.82	366.254	9.6	34.1152	7.32444
	H7Bx_59_7	-	-	-	0.46903	0.0211	0.05986	0.00158	0.58673	0.05687	0.00256	373.51	9.58	390.5	14.58	486	98.22	373.51	9.58	23.1461	4.35086
	H7Bx_59_51	-	-	-	0.4201	0.06554	0.05996	0.00276	0.295049	0.05082	0.00806	376.877	16.74	356.1	46.86	232.7	346.9	376.877	16.74	-61.9585	-5.83471
	H7Bx_59_15	-	-	-	0.58815	0.03484	0.06873	0.00198	0.486327	0.0621	0.00374	425.041	11.94	469.7	22.26	677.5	125.96	425.041	11.94	37.2633	9.50801
	H7Bx_59_75	-	-	-	0.52081	0.03268	0.06855	0.00208	0.483563	0.05512	0.00334	427.546	12.52	425.7	21.82	417	131.18	427.546	12.52	-2.52891	-0.433532
	H7Bx_59_6	-	-	-	0.56007	0.02742	0.07062	0.00186	0.537973	0.05755	0.00284	438.903	11.24	451.6	17.84	512.3	107.22	438.903	11.24	14.3269	2.81148
	H7Bx_59_79	-	-	-	0.58138	0.03968	0.07177	0.00228	0.465458	0.05878	0.00384	445.242	13.76	465.3	25.48	559	138.96	445.242	13.76	20.3503	4.31083
	H7Bx_59_1	-	-	-	0.55103	0.03578	0.07254	0.00214	0.45433	0.05512	0.00368	451.905	12.86	445.7	23.42	417	144.6	451.905	12.86	-8.37049	-1.39218
	H7Bx_59_39	-	-	-	0.62205	0.039	0.07864	0.00238	0.482719	0.0574	0.00356	487.713	14.26	491.1	24.42	506.5	134.66	487.713	14.26	3.70916	0.689658
	H7Bx_59_33	-	-	-	0.79352	0.04044	0.09676	0.00266	0.539427	0.0595	0.003	595.586	15.6	593.2	22.9	585.5	107.5	595.586	15.6	-1.72261	-0.402207
	H7Bx_59_65	-	-	-	0.95966	0.06252	0.10755	0.00338	0.482397	0.06475	0.00406	656.029	19.64	683.1	32.4	766.2	129.26	656.029	19.64	14.3788	3.9629
	H7Bx_59_27	-	-	-	1.67536	0.0803	0.16586	0.0046	0.57864	0.0733	0.00346	987.929	25.42	999.2	30.48	1022.2	93.94	987.929	25.42	3.35269	1.12802
	H7Bx_59_97				2.25286	0.09308	0.20235	0.00548	0.655474	0.0808	0.0032	1186.38	29.36	1197.7	29.06	1216.5	76.88	1216.5	76.88	2.47622	0.945409
	H7Bx_59_24	-	-	-	3.47911	0.15486	0.25987	0.007	0.605161	0.09716	0.00426	1482.42	35.78	1522.5	35.1	1570.3	81.12	1570.3	81.12	5.59669	2.63282
	H7Bx_59_50	-	-	-	5.56819	0.25162	0.35524	0.00962	0.599269	0.1137	0.00494	1973.86	45.76	1911.2	38.9	1859.4	77.52	1859.4	77.52	-6.15571	-3.27853
	H7Bx_59_83	-	-	-	10.4075	0.6171	0.41888	0.01318	0.530662	0.18029	0.00984	2157.69	59.86	2471.7	54.92	2655.6	89.08	2655.6	89.08	18.7494	12.7042
	U-Pb LA-ICPMS detrital zircon data
	Sample Location: GSQ Hughenden 7 (sample name: H7Bx_66; Hughenden, Queensland)
	Formation: Injune Creek Group
	Sample #	Th (PPM)	U (PPM)	Th/U	Pb207	±	Pb206	±	Error	Pb207	±	Pb206	± 2σ	Pb207	± 2σ	Pb207	± 2σ	Preferred	± 2σ	Pb-Pb/U-Pb Discordance (%)	U-Pb/U-Pb Discordance (%)
	H7Bx_66				/U235	2σ	/U238	2σ	Corr.	/Pb206	2σ	/U238 (Ma)	(Ma)	/U235	(Ma)	/Pb206	(Ma)	Age	(Ma)
	H7Bx_66_35	-	-	-	0.19139	0.009	0.02456	0.00062	0.536834	0.05652	0.00264	154.978	3.9	177.8	7.68	472.1	102.44	154.978	3.9	67.1726	12.8357
	H7Bx_66_1	-	-	-	0.19518	0.0127	0.02554	0.00072	0.433255	0.05544	0.0036	161.331	4.56	181	10.8	429.7	141.26	161.331	4.56	62.4549	10.8667
	H7Bx_66_2	-	-	-	0.1982	0.01224	0.02572	0.0007	0.440706	0.0559	0.00346	162.365	4.44	183.6	10.38	448	134.42	162.365	4.44	63.7578	11.5659
	H7Bx_66_70	-	-	-	0.18685	0.0091	0.02645	0.0007	0.543406	0.05126	0.00244	167.908	4.34	173.9	7.78	252.3	107.84	167.908	4.34	33.4491	3.44565
	H7Bx_66_31	-	-	-	0.18693	0.00926	0.02695	0.0007	0.524333	0.05032	0.00244	171.255	4.44	174	7.92	210	110.64	171.255	4.44	18.4499	1.57741
	H7Bx_66_14	-	-	-	0.18682	0.0176	0.02712	0.00084	0.328776	0.04998	0.00476	172.399	5.28	173.9	15.06	194.2	213.88	172.399	5.28	11.226	0.863039
	H7Bx_66_61	-	-	-	0.20157	0.0101	0.02816	0.00074	0.524449	0.05192	0.00256	178.518	4.66	186.5	8.54	282	110.5	178.518	4.66	36.6957	4.27976
	H7Bx_66_64	-	-	-	0.20554	0.0298	0.02837	0.00112	0.272294	0.05254	0.00776	179.698	7.02	189.8	25.1	308.9	318.6	179.698	7.02	41.8264	5.32225
	H7Bx_66_23	-	-	-	0.20314	0.0136	0.02888	0.0008	0.413761	0.05103	0.00342	183.244	5.04	187.8	11.46	242.4	150.84	183.244	5.04	24.4044	2.42617
	H7Bx_66_54	-	-	-	0.21981	0.01204	0.02943	0.00078	0.483866	0.05417	0.00294	185.971	4.88	201.8	10.02	378.1	119.6	185.971	4.88	50.8144	7.844
	H7Bx_66_67	-	-	-	0.27157	0.01348	0.03511	0.0009	0.516421	0.0561	0.00276	220.936	5.58	243.9	10.76	455.9	107.4	220.936	5.58	51.5384	9.41524
	H7Bx_66_34	-	-	-	0.26495	0.0089	0.03663	0.0009	0.731441	0.05247	0.00166	231.433	5.58	238.7	7.14	306.1	70.94	231.433	5.58	24.3931	3.04457
	H7Bx_66_79	-	-	-	0.29281	0.02046	0.04027	0.00114	0.405138	0.05275	0.0037	254.053	7.08	260.8	16.08	318	155.78	254.053	7.08	20.1091	2.58705
	H7Bx_66_10	-	-	-	0.34156	0.01814	0.04189	0.0011	0.494438	0.05916	0.00314	262.054	6.8	298.4	13.72	573	113.1	262.054	6.8	54.2664	12.1804
	H7Bx_66_71	-	-	-	0.32987	0.01844	0.04227	0.00118	0.499381	0.05662	0.0031	265.234	7.36	289.5	14.08	476	119.48	265.234	7.36	44.2785	8.38195
	H7Bx_66_8	-	-	-	0.32433	0.01234	0.04239	0.00106	0.657226	0.05551	0.002	266.343	6.62	285.2	9.46	432.6	78.72	266.343	6.62	38.4321	6.61192
	H7Bx_66_53	-	-	-	0.30061	0.0101	0.04224	0.00104	0.73281	0.05163	0.00162	266.685	6.4	266.9	7.9	269	71.42	266.685	6.4	0.860506	0.0804654
	H7Bx_66_12	-	-	-	0.35896	0.015	0.04841	0.0012	0.5932	0.0538	0.0022	304.246	7.4	311.4	11.2	362.4	90.82	304.246	7.4	16.0469	2.2973
	H7Bx_66_93	-	-	-	0.37622	0.01354	0.05019	0.00128	0.708624	0.05437	0.00182	315.042	7.82	324.3	10	386.5	74.38	315.042	7.82	18.4885	2.85483
	H7Bx_66_16	-	-	-	0.38653	0.02034	0.05254	0.00136	0.491905	0.05337	0.0028	329.96	8.3	331.8	14.9	344.3	116.38	329.96	8.3	4.16491	0.554489
	H7Bx_66_5	-	-	-	0.38493	0.01584	0.05321	0.00132	0.602847	0.05248	0.0021	334.463	8.06	330.7	11.62	306.3	89.96	334.463	8.06	-9.19443	-1.13775
	H7Bx_66_21	-	-	-	0.43554	0.01648	0.05843	0.00152	0.687509	0.05408	0.00192	365.982	9.22	367.1	11.66	374.1	78.9	365.982	9.22	2.17004	0.304578
	H7Bx_66_50	-	-	-	0.53477	0.01854	0.06993	0.00168	0.692952	0.05547	0.00184	435.793	10.16	435	12.26	430.8	72.08	435.793	10.16	-1.15901	-0.1823
	H7Bx_66_26	-	-	-	0.56784	0.01834	0.0724	0.00176	0.752663	0.0569	0.00172	450.087	10.6	456.6	11.88	487	66.66	450.087	10.6	7.57964	1.42638
	H7Bx_66_78	-	-	-	0.73654	0.02538	0.07963	0.00194	0.707017	0.0671	0.0022	487.984	11.58	560.4	14.84	840.7	67.58	487.984	11.58	41.9551	12.9222
	H7Bx_66_69	-	-	-	0.6404	0.021	0.08032	0.00196	0.744157	0.05784	0.00178	497.633	11.7	502.6	13	523.4	67.02	497.633	11.7	4.92306	0.988318
	H7Bx_66_94	-	-	-	0.65028	0.01978	0.08057	0.00196	0.799755	0.05854	0.00164	498.728	11.68	508.6	12.16	550.2	60.26	498.728	11.68	9.35506	1.94092
	H7Bx_66_33	-	-	-	0.67786	0.0194	0.0828	0.00202	0.852431	0.05939	0.00152	511.69	12	525.5	11.74	581.4	55.32	511.69	12	11.9899	2.62788
	H7Bx_66_43	-	-	-	0.67436	0.0211	0.08428	0.0021	0.79635	0.05805	0.00166	521.454	12.44	523.4	12.8	531.1	62.7	521.454	12.44	1.81616	0.371724
	H7Bx_66_68	-	-	-	0.72748	0.03174	0.08514	0.00214	0.576095	0.06197	0.00266	524.189	12.7	555.1	18.66	673	90.44	524.189	12.7	22.1116	5.5686
	H7Bx_66_42	-	-	-	0.71289	0.02594	0.0851	0.0021	0.678176	0.06077	0.00212	524.701	12.5	546.5	15.38	631.3	73.98	524.701	12.5	16.8856	3.98886
	H7Bx_66_84	-	-	-	0.69857	0.02518	0.08672	0.00216	0.691017	0.05844	0.002	535.936	12.84	537.9	15.04	546.2	73.56	535.936	12.84	1.87913	0.365083
	H7Bx_66_66	-	-	-	0.69563	0.02144	0.08736	0.00216	0.802222	0.05777	0.00162	540.226	12.74	536.2	12.84	520.7	61.52	540.226	12.74	-3.74986	-0.750749
	H7Bx_66_4	-	-	-	0.719	0.0283	0.08874	0.0022	0.629862	0.05877	0.00224	547.897	12.98	550.1	16.72	558.7	82.26	547.897	12.98	1.93356	0.400441
	H7Bx_66_49	-	-	-	0.7606	0.02176	0.09045	0.0022	0.850181	0.061	0.00158	556.713	12.94	574.4	12.54	639.3	54.98	556.713	12.94	12.9183	3.07913
	H7Bx_66_92	-	-	-	0.77836	0.02396	0.09113	0.00226	0.80564	0.06196	0.00174	560.154	13.32	584.5	13.68	672.7	59.22	560.154	13.32	16.7305	4.16526
	H7Bx_66_85	-	-	-	0.751	0.02942	0.09118	0.00226	0.632712	0.05975	0.00226	561.929	13.38	568.8	17.06	594.3	81.3	561.929	13.38	5.44696	1.20803
	H7Bx_66_22	-	-	-	0.79771	0.02672	0.09499	0.0023	0.722867	0.06092	0.00194	583.99	13.54	595.5	15.08	636.3	67.6	583.99	13.54	8.22103	1.9329
	H7Bx_66_41	-	-	-	0.86644	0.0285	0.09623	0.00242	0.764537	0.06532	0.00198	588.332	14.22	633.6	15.5	784.6	62.92	588.332	14.22	25.015	7.1445
	H7Bx_66_15	-	-	-	0.80177	0.0236	0.09727	0.00234	0.817287	0.0598	0.00162	598.43	13.72	597.8	13.3	596.2	58.12	598.43	13.72	-0.374054	-0.105405
	H7Bx_66_98	-	-	-	0.84916	0.02806	0.0993	0.00248	0.755795	0.06204	0.0019	608.971	14.54	624.2	15.4	675.3	64.5	608.971	14.54	9.82219	2.43981
	H7Bx_66_77	-	-	-	0.8521	0.0351	0.09977	0.00272	0.661839	0.06196	0.00238	611.834	15.94	625.8	19.24	672.7	81.02	611.834	15.94	9.048	2.23169
	H7Bx_66_30	-	-	-	0.92038	0.03756	0.10248	0.00258	0.616911	0.06515	0.00258	625.636	15.14	662.6	19.86	779.2	82.24	625.636	15.14	19.7079	5.57859
	H7Bx_66_83	-	-	-	0.89292	0.03054	0.10356	0.0026	0.734049	0.06255	0.00198	633.995	15.22	647.9	16.38	693	67.02	633.995	15.22	8.51448	2.14621
	H7Bx_66_74	-	-	-	0.8932	0.03008	0.10519	0.00258	0.72831	0.06159	0.00196	644.424	15	648.1	16.14	660	67.3	644.424	15	2.35995	0.567146
	H7Bx_66_11	-	-	-	0.91444	0.0353	0.10541	0.00282	0.693023	0.06293	0.00226	644.717	16.5	659.4	18.72	705.9	75.2	644.717	16.5	8.6674	2.22674
	H7Bx_66_80	-	-	-	0.95304	0.03634	0.11086	0.00274	0.648189	0.06237	0.0023	677.53	15.94	679.7	18.9	686.8	77.42	677.53	15.94	1.34968	0.319204
	H7Bx_66_91	-	-	-	0.95095	0.03074	0.11202	0.00268	0.740105	0.06157	0.00188	685.055	15.54	678.6	16	659.2	64.76	685.055	15.54	-3.92211	-0.951161
	H7Bx_66_19	-	-	-	1.28644	0.0364	0.13719	0.0033	0.850119	0.06803	0.00174	827.491	18.7	839.7	16.16	869.3	52.68	827.491	18.7	4.80951	1.45398
	H7Bx_66_18	-	-	-	1.31478	0.05656	0.14129	0.0036	0.59229	0.06751	0.00284	851.902	20.38	852.2	24.8	853.6	86.26	851.902	20.38	0.198906	0.034952
	H7Bx_66_46	-	-	-	1.4798	0.05374	0.1504	0.0037	0.677422	0.07137	0.0025	900.906	20.72	922.1	22	968.2	70.46	900.906	20.72	6.95045	2.29848
	H7Bx_66_40	-	-	-	1.63158	0.05182	0.15797	0.00388	0.773336	0.07493	0.00222	940.795	21.6	982.5	20	1066.5	58.78	940.795	21.6	11.7867	4.24483
	H7Bx_66_7	-	-	-	1.64333	0.04456	0.1647	0.0039	0.873274	0.07237	0.00178	982.306	21.56	987	17.12	996.5	49.58	982.306	21.56	1.42434	0.475538
	H7Bx_66_81	-	-	-	1.72849	0.04784	0.16732	0.00408	0.881025	0.07494	0.00182	994.451	22.58	1019.2	17.8	1066.8	48.64	994.451	22.58	6.78186	2.42827
	H7Bx_66_20	-	-	-	1.69828	0.06214	0.16717	0.00412	0.673561	0.07369	0.0026	995.009	22.76	1007.9	23.38	1032.9	70.52	995.009	22.76	3.66844	1.27903
	H7Bx_66_48	-	-	-	1.74565	0.04914	0.16815	0.00408	0.861956	0.07531	0.0019	998.786	22.48	1025.6	18.18	1076.8	50.34	998.786	22.48	7.24502	2.61451
	H7Bx_66_55	-	-	-	1.76454	0.05036	0.17373	0.00422	0.851106	0.07368	0.0019	1032.63	23.14	1032.5	18.5	1032.7	50.8	1032.7	50.8	0.00714447	-0.0122246
	H7Bx_66_6	-	-	-	1.72477	0.04684	0.1687	0.00404	0.881821	0.07417	0.0018	1003.24	22.26	1017.8	17.46	1046	48.76	1046	48.76	4.08814	1.43073
	H7Bx_66_36	-	-	-	1.73515	0.05614	0.16865	0.0043	0.788037	0.07464	0.0022	1002.41	23.7	1021.7	20.84	1058.4	59.18	1058.4	59.18	5.28964	1.88759
	H7Bx_66_52	-	-	-	1.91757	0.05526	0.18218	0.0044	0.838093	0.07636	0.002	1077.69	24.04	1087.2	19.24	1104.4	51.8	1104.4	51.8	2.41871	0.874927
	H7Bx_66_47	-	-	-	2.31377	0.07714	0.21247	0.00552	0.779259	0.079	0.00238	1245.93	29.4	1216.5	23.64	1172.1	58.88	1172.1	58.88	-6.29867	-2.41896
	H7Bx_66_24	-	-	-	2.00877	0.06712	0.18442	0.0047	0.762725	0.07902	0.00244	1087.17	25.58	1118.5	22.66	1172.6	60.28	1172.6	60.28	7.28579	2.80135
	H7Bx_66_72	-	-	-	2.00013	0.05924	0.18296	0.00454	0.837805	0.07931	0.0021	1078.52	24.7	1115.6	20.06	1179.8	52.1	1179.8	52.1	8.58457	3.32384
	H7Bx_66_28	-	-	-	2.13077	0.05674	0.19431	0.00466	0.900613	0.07955	0.00188	1142.57	25.14	1158.8	18.4	1185.8	46.3	1185.8	46.3	3.64541	1.40035
	H7Bx_66_60	-	-	-	2.38979	0.06862	0.21628	0.00524	0.84377	0.08015	0.00208	1265.79	27.72	1239.5	20.56	1200.8	50.92	1200.8	50.92	-5.41217	-2.12097
	H7Bx_66_97	-	-	-	2.17178	0.0628	0.19557	0.0048	0.84878	0.08055	0.00208	1148.41	25.86	1172.1	20.1	1210.5	50.52	1210.5	50.52	5.12937	2.02125
	H7Bx_66_3	-	-	-	2.16615	0.06034	0.1931	0.0047	0.873773	0.08138	0.00202	1133.38	25.36	1170.2	19.36	1230.5	48.5	1230.5	48.5	7.89304	3.1468
	H7Bx_66_17	-	-	-	2.22731	0.0696	0.19635	0.00484	0.788834	0.08229	0.00238	1150.56	26.04	1189.7	21.9	1252.5	55.7	1252.5	55.7	8.13922	3.29022
	H7Bx_66_65	-	-	-	2.47014	0.08656	0.21306	0.00536	0.717905	0.0841	0.00278	1242.15	28.44	1263.3	25.32	1294.8	63.76	1294.8	63.76	4.0663	1.67422
	H7Bx_66_96	-	-	-	4.00826	0.1377	0.27331	0.00706	0.751919	0.10638	0.00334	1540.55	35.78	1635.9	27.92	1738.3	56.8	1738.3	56.8	11.3758	5.82837
	H7Bx_66_25	-	-	-	4.46212	0.13702	0.29688	0.00746	0.818305	0.10904	0.00302	1664.31	37.1	1724	25.48	1783.3	50.2	1783.3	50.2	6.67266	3.46251
	H7Bx_66_32	-	-	-	5.15509	0.14176	0.32817	0.00798	0.884273	0.11396	0.00278	1825.2	38.7	1845.2	23.38	1863.5	43.62	1863.5	43.62	2.05532	1.08394
	H7Bx_66_75	-	-	-	12.3079	0.34542	0.49549	0.01208	0.868701	0.18019	0.00454	2573.93	52.08	2628.2	26.36	2654.6	41.42	2654.6	41.42	3.03875	2.06478
	U-Pb LA-ICPMS detrital zircon data
	Sample Location: GSQ Hughenden 7 (sample name: H7Bx_55; Hughenden, Queensland)
	Formation: Gilbert River Formation
	Sample #	Th (PPM)	U (PPM)	Th/U	Pb207	±	Pb206	±	Error	Pb207	±	Pb206	± 2σ	Pb207	± 2σ	Pb207	± 2σ	Preferred	± 2σ	Pb-Pb/U-Pb Discordance (%)	U-Pb/U-Pb Discordance (%)
	H7Bx_55				/U235	2σ	/U238	2σ	Corr.	/Pb206	2σ	/U238 (Ma)	(Ma)	/U235	(Ma)	/Pb206	(Ma)	Age	(Ma)
	H7Bx_55_101	-	-	-	0.13088	0.01036	0.01875	0.00054	0.363836	0.05063	0.00406	119.419	3.42	124.9	9.3	224	180.02	119.419	3.42	46.688	4.38843
	H7Bx_55_93	-	-	-	0.14193	0.00884	0.01915	0.00054	0.452738	0.05376	0.00334	121.471	3.44	134.8	7.86	361	136.68	121.471	3.44	66.3516	9.88826
	H7Bx_55_6	-	-	-	0.12881	0.00822	0.01942	0.00052	0.419597	0.04812	0.00306	124.049	3.32	123	7.4	105.1	147.38	124.049	3.32	-18.0297	-0.85299
	H7Bx_55_91	-	-	-	0.14507	0.00984	0.02015	0.00056	0.409728	0.05222	0.00356	128.021	3.54	137.5	8.72	295	151.68	128.021	3.54	56.6031	6.89401
	H7Bx_55_90	-	-	-	0.14534	0.01014	0.02042	0.00056	0.393079	0.05164	0.00364	129.819	3.58	137.8	9	269.5	157.18	129.819	3.58	51.8295	5.79138
	H7Bx_55_17	-	-	-	0.1393	0.01084	0.02054	0.00058	0.362869	0.04918	0.00386	130.981	3.7	132.4	9.66	156.2	178.86	130.981	3.7	16.1453	1.07169
	H7Bx_55_95	-	-	-	0.14028	0.02286	0.02076	0.00084	0.248297	0.04902	0.00812	132.401	5.26	133.3	20.34	148.6	366.86	132.401	5.26	10.9011	0.674413
	H7Bx_55_2	-	-	-	0.15111	0.0151	0.02088	0.00068	0.325908	0.05249	0.00532	132.582	4.24	142.9	13.32	306.7	222.76	132.582	4.24	56.7713	7.22018
	H7Bx_55_9	-	-	-	0.16053	0.01284	0.02101	0.00062	0.368941	0.05541	0.00448	132.912	3.94	151.2	11.24	428.7	174.94	132.912	3.94	68.9964	12.0951
	H7Bx_55_69	-	-	-	0.14315	0.01034	0.02095	0.0006	0.396495	0.04957	0.0036	133.512	3.74	135.8	9.18	174.9	164.88	133.512	3.74	23.6636	1.68451
	H7Bx_55_53	-	-	-	0.15342	0.00874	0.02108	0.00056	0.466324	0.05279	0.003	133.793	3.54	144.9	7.7	319.9	126.5	133.793	3.54	58.1766	7.66517
	H7Bx_55_80	-	-	-	0.15037	0.00738	0.02155	0.00056	0.529475	0.05062	0.00244	137.129	3.58	142.2	6.52	223.6	109.38	137.129	3.58	38.6723	3.56631
	H7Bx_55_42	-	-	-	0.16432	0.01204	0.0217	0.00062	0.389938	0.05494	0.00406	137.328	3.92	154.5	10.5	409.8	159.72	137.328	3.92	66.4889	11.1143
	H7Bx_55_96	-	-	-	0.14751	0.00572	0.02158	0.00054	0.645309	0.04958	0.00184	137.497	3.4	139.7	5.06	175.5	85.76	137.497	3.4	21.6539	1.57669
	H7Bx_55_27	-	-	-	0.15214	0.00968	0.02191	0.00058	0.416058	0.05037	0.00322	139.447	3.72	143.8	8.52	212	144.54	139.447	3.72	34.2232	3.0272
	H7Bx_55_26	-	-	-	0.15752	0.01044	0.02215	0.0006	0.408708	0.05159	0.00344	140.748	3.8	148.5	9.16	267.2	149.1	140.748	3.8	47.3249	5.22027
	H7Bx_55_19	-	-	-	0.16418	0.00846	0.02223	0.00058	0.506336	0.05357	0.00274	140.902	3.62	154.4	7.38	353	113.56	140.902	3.62	60.0845	8.74246
	H7Bx_55_88	-	-	-	0.15277	0.0061	0.02238	0.00056	0.626666	0.04953	0.0019	142.566	3.56	144.4	5.38	172.8	88.14	142.566	3.56	17.4963	1.26986
	H7Bx_55_36	-	-	-	0.18573	0.01422	0.02437	0.00074	0.396605	0.05528	0.00426	154.029	4.6	173	12.16	423.3	166.78	154.029	4.6	63.6124	10.9661
	H7Bx_55_30	-	-	-	0.20089	0.00876	0.02751	0.0007	0.583528	0.05297	0.00226	174.205	4.36	185.9	7.4	327.4	94.8	174.205	4.36	46.7913	6.29092
	H7Bx_55_74	-	-	-	0.23001	0.01298	0.03137	0.00084	0.474501	0.0532	0.003	198.348	5.22	210.2	10.72	337.3	125.7	198.348	5.22	41.1953	5.63832
	H7Bx_55_52	-	-	-	0.28395	0.01198	0.03741	0.00092	0.582888	0.05505	0.00228	235.549	5.78	253.8	9.48	414.3	89.72	235.549	5.78	43.1454	7.19123
	H7Bx_55_34	-	-	-	0.2825	0.01644	0.03761	0.00102	0.46603	0.05448	0.00316	236.961	6.34	252.6	13	390.9	126.76	236.961	6.34	39.3807	6.19132
	H7Bx_55_75	-	-	-	0.288	0.0175	0.03799	0.00104	0.450525	0.05499	0.00334	239.175	6.48	257	13.8	411.8	131.66	239.175	6.48	41.9195	6.93567
	H7Bx_55_48	-	-	-	0.26825	0.01462	0.03819	0.001	0.480444	0.05096	0.00274	241.621	6.18	241.3	11.7	238.8	121.4	241.621	6.18	-1.18131	-0.13302
	H7Bx_55_89	-	-	-	0.27745	0.01136	0.03854	0.00098	0.621042	0.05223	0.00206	243.427	6.04	248.6	9.04	295.3	89	243.427	6.04	17.5663	2.08102
	H7Bx_55_25	-	-	-	0.28346	0.01344	0.03941	0.001	0.535163	0.05216	0.00244	248.875	6.2	253.4	10.64	292.2	105.12	248.875	6.2	14.827	1.78556
	H7Bx_55_78	-	-	-	0.27607	0.01356	0.03968	0.00102	0.523345	0.05048	0.00244	251.079	6.36	247.5	10.78	217	110.06	251.079	6.36	-15.7044	-1.44591
	H7Bx_55_3	-	-	-	0.28163	0.00942	0.04003	0.00098	0.731928	0.05103	0.0016	253.094	6.08	252	7.46	242.3	71.42	253.094	6.08	-4.45478	-0.434104
	H7Bx_55_77	-	-	-	0.29013	0.0122	0.04131	0.00104	0.598702	0.05095	0.00208	261.108	6.46	258.7	9.6	238.6	92.76	261.108	6.46	-9.43326	-0.930711
	H7Bx_55_72	-	-	-	0.32903	0.01376	0.04357	0.00114	0.625654	0.05479	0.0022	273.901	7.04	288.8	10.52	403.5	87.76	273.901	7.04	32.1187	5.15893
	H7Bx_55_40	-	-	-	0.36863	0.0171	0.04577	0.0012	0.565191	0.05843	0.00264	286.249	7.42	318.6	12.68	545.9	97.04	286.249	7.42	47.5638	10.1541
	H7Bx_55_57	-	-	-	0.36373	0.01156	0.04642	0.00112	0.759161	0.05683	0.0017	290.831	6.9	315	8.6	484.3	65.9	290.831	6.9	39.9482	7.67269
	H7Bx_55_62	-	-	-	0.34816	0.01512	0.04659	0.0012	0.593083	0.05421	0.00228	292.824	7.44	303.3	11.38	379.7	93.02	292.824	7.44	22.8802	3.45409
	H7Bx_55_43	-	-	-	0.35917	0.0136	0.04672	0.00116	0.655717	0.05576	0.00202	293.07	7.18	311.6	10.16	442.5	78.9	293.07	7.18	33.7695	5.94674
	H7Bx_55_39	-	-	-	0.38358	0.01202	0.04696	0.00116	0.788282	0.05926	0.0017	293.285	7.16	329.7	8.82	576.7	61.84	293.285	7.16	49.1442	11.0448
	H7Bx_55_86	-	-	-	0.36609	0.0253	0.04689	0.00132	0.407344	0.05664	0.00394	293.803	8.14	316.8	18.8	476.6	152.02	293.803	8.14	38.3545	7.25928
	H7Bx_55_31	-	-	-	0.34099	0.01342	0.04671	0.0012	0.65277	0.05296	0.00198	294.018	7.42	297.9	10.16	327	83.26	294.018	7.42	10.0863	1.30314
	H7Bx_55_54	-	-	-	0.33849	0.01442	0.04669	0.00118	0.593251	0.05259	0.00218	294.027	7.26	296	10.94	311.1	92.7	294.027	7.26	5.48786	0.666466
	H7Bx_55_23	-	-	-	0.34289	0.01108	0.04686	0.00114	0.752866	0.05308	0.0016	294.905	7.06	299.4	8.38	332	67.3	294.905	7.06	11.1732	1.5013
	H7Bx_55_22	-	-	-	0.38471	0.01276	0.04751	0.00118	0.748824	0.05873	0.00182	296.865	7.26	330.5	9.36	557.2	66.66	296.865	7.26	46.7219	10.1769
	H7Bx_55_33	-	-	-	0.3699	0.01252	0.0477	0.00116	0.718488	0.05625	0.0018	298.948	7.2	319.6	9.28	461.6	70.34	298.948	7.2	35.2366	6.46184
	H7Bx_55_82	-	-	-	0.36842	0.01654	0.04775	0.0012	0.559778	0.05596	0.00248	299.364	7.36	318.5	12.26	450.5	96.4	299.364	7.36	33.5486	6.0083
	H7Bx_55_65	-	-	-	0.34321	0.01056	0.04776	0.00118	0.802997	0.05212	0.00146	300.839	7.26	299.6	7.98	290.9	63.38	300.839	7.26	-3.41681	-0.413714
	H7Bx_55_63	-	-	-	0.34759	0.01294	0.04795	0.00122	0.683446	0.05259	0.00186	301.845	7.48	302.9	9.76	311.3	79	301.845	7.48	3.0373	0.348337
	H7Bx_55_100	-	-	-	0.33262	0.01348	0.04828	0.00122	0.623521	0.04998	0.00196	304.862	7.46	291.6	10.28	194	89.96	304.862	7.46	-57.1455	-4.54811
	H7Bx_55_98	-	-	-	0.36835	0.0193	0.04875	0.00126	0.493287	0.0548	0.00286	305.976	7.8	318.4	14.32	404.2	113.02	305.976	7.8	24.3009	3.90208
	H7Bx_55_4	-	-	-	0.35011	0.01268	0.04866	0.0012	0.680917	0.05219	0.0018	306.397	7.36	304.8	9.54	293.8	77.58	306.397	7.36	-4.28774	-0.524078
	H7Bx_55_7	-	-	-	0.39238	0.01754	0.04902	0.00132	0.60239	0.05807	0.0025	306.411	8.1	336.1	12.8	531.9	93.58	306.411	8.1	42.3931	8.83339
	H7Bx_55_79	-	-	-	0.35793	0.01126	0.04946	0.0012	0.771235	0.05249	0.00152	311.244	7.42	310.7	8.42	307	65.64	311.244	7.42	-1.38241	-0.175091
	H7Bx_55_64	-	-	-	0.35506	0.01124	0.04949	0.00124	0.791479	0.05205	0.0015	311.597	7.56	308.5	8.42	287.5	65.42	311.597	7.56	-8.38172	-1.00404
	H7Bx_55_92	-	-	-	0.38331	0.01316	0.05148	0.00128	0.724212	0.05402	0.00174	323.151	7.9	329.5	9.66	371.6	71.78	323.151	7.9	13.038	1.92694
	H7Bx_55_21	-	-	-	0.39638	0.0146	0.05294	0.00128	0.656425	0.0543	0.00192	332.055	7.88	339	10.6	383.6	78.58	332.055	7.88	13.4372	2.04876
	H7Bx_55_81	-	-	-	0.40168	0.01758	0.05384	0.00134	0.568671	0.05412	0.00232	337.682	8.24	342.9	12.72	375.7	95.18	337.682	8.24	10.1192	1.52173
	H7Bx_55_8	-	-	-	0.42151	0.01688	0.05402	0.00134	0.619421	0.05658	0.0022	337.776	8.14	357.1	12.06	474.5	86.06	337.776	8.14	28.8144	5.4114
	H7Bx_55_20	-	-	-	0.42112	0.01384	0.05406	0.00132	0.742964	0.05651	0.00174	338.051	8.06	356.9	9.9	471.6	68.16	338.051	8.06	28.3183	5.28134
	H7Bx_55_14	-	-	-	0.39223	0.01124	0.05412	0.00134	0.864015	0.05257	0.00132	340.051	8.24	336	8.2	310.3	56.76	340.051	8.24	-9.58783	-1.20567
	H7Bx_55_83	-	-	-	0.42181	0.01398	0.05509	0.00134	0.733908	0.05554	0.00174	344.794	8.2	357.3	9.98	433.7	67.88	344.794	8.2	20.4995	3.50018
	H7Bx_55_60	-	-	-	0.41638	0.01294	0.05582	0.00136	0.783979	0.0541	0.00156	349.9	8.28	353.5	9.28	375.2	64.32	349.9	8.28	6.74312	1.01844
	H7Bx_55_47	-	-	-	0.49225	0.0192	0.05667	0.0014	0.633373	0.063	0.00238	351.291	8.58	406.4	13.06	708.3	79.6	351.291	8.58	50.4037	13.5603
	H7Bx_55_99	-	-	-	0.40646	0.01744	0.05623	0.00144	0.596851	0.05244	0.00218	353.138	8.76	346.3	12.6	304.6	93.38	353.138	8.76	-15.9351	-1.9747
	H7Bx_55_67	-	-	-	0.46159	0.01748	0.05796	0.00146	0.66518	0.05777	0.00208	361.461	8.94	385.4	12.14	520.8	78.68	361.461	8.94	30.595	6.21147
	H7Bx_55_71	-	-	-	0.42107	0.01406	0.05784	0.00152	0.787017	0.05282	0.0016	362.905	9.3	356.8	10.04	321.1	67.74	362.905	9.3	-13.0194	-1.71114
	H7Bx_55_35	-	-	-	0.43953	0.01284	0.05908	0.00144	0.834345	0.05397	0.00144	370.031	8.72	369.9	9.06	369.6	61	370.031	8.72	-0.116494	-0.0352965
	H7Bx_55_87	-	-	-	0.45273	0.02102	0.05978	0.00154	0.554845	0.05495	0.0025	373.891	9.4	379.2	14.7	410.1	99	373.891	9.4	8.82922	1.39995
	H7Bx_55_55	-	-	-	0.48728	0.01918	0.06044	0.00148	0.62211	0.05849	0.00224	376.321	9.02	403.1	13.1	548	82.74	376.321	9.02	31.3283	6.64324
	H7Bx_55_59	-	-	-	0.49759	0.01954	0.06196	0.00154	0.632931	0.05825	0.00222	385.726	9.32	410.1	13.26	538.5	83.56	385.726	9.32	28.3703	5.94345
	H7Bx_55_16	-	-	-	0.52289	0.01648	0.06557	0.00162	0.783904	0.05784	0.00168	407.972	9.78	427.1	11	523.5	63.48	407.972	9.78	22.0683	4.47852
	H7Bx_55_11	-	-	-	0.5418	0.0202	0.06725	0.00172	0.685999	0.05844	0.00206	417.917	10.44	439.6	13.3	546.3	75.74	417.917	10.44	23.5005	4.93248
	H7Bx_55_12	-	-	-	0.54945	0.01714	0.06884	0.00168	0.782322	0.05789	0.00166	427.885	10.14	444.6	11.24	525.3	63.1	427.885	10.14	18.5446	3.75949
	H7Bx_55_70	-	-	-	0.53972	0.01824	0.07016	0.0017	0.716973	0.05579	0.0018	437.029	10.22	438.2	12.02	443.7	70.02	437.029	10.22	1.50358	0.267315
	H7Bx_55_61	-	-	-	0.59218	0.01808	0.07532	0.00184	0.800134	0.05703	0.0016	467.774	11.08	472.3	11.54	492.1	61.82	467.774	11.08	4.94339	0.958384
	H7Bx_55_84	-	-	-	0.74004	0.02256	0.09205	0.00226	0.80538	0.05832	0.00164	568.117	13.32	562.4	13.16	541.1	62.06	568.117	13.32	-4.99307	-1.01662
	H7Bx_55_13	-	-	-	0.87611	0.02454	0.09616	0.00236	0.876197	0.06609	0.00164	587.376	13.88	638.9	13.28	809.3	51.52	587.376	13.88	27.4217	8.06444
	H7Bx_55_44	-	-	-	0.88765	0.0264	0.10531	0.00254	0.810965	0.06114	0.00168	645.48	14.86	645.1	14.2	644.2	58.2	645.48	14.86	-0.19877	-0.0589793
	H7Bx_55_66	-	-	-	1.15352	0.03026	0.11031	0.00262	0.905404	0.07585	0.00178	663.604	15.22	778.9	14.26	1091.1	46.68	663.604	15.22	39.1802	14.8024
	H7Bx_55_32	-	-	-	1.09533	0.02926	0.11381	0.00274	0.901241	0.06981	0.00166	688.981	15.84	751.1	14.18	922.7	48.42	688.981	15.84	25.3299	8.27045
	H7Bx_55_5	-	-	-	1.95801	0.07088	0.18403	0.00468	0.702503	0.07717	0.00266	1087.23	25.48	1101.2	24.34	1125.6	67.72	1125.6	67.72	3.40898	1.26875
	H7Bx_55_10	-	-	-	2.08808	0.05714	0.19344	0.00472	0.891667	0.0783	0.0019	1139.25	25.52	1144.9	18.8	1154.5	47.66	1154.5	47.66	1.32077	0.493347
	H7Bx_55_1	-	-	-	2.14255	0.05742	0.19531	0.00476	0.90939	0.07957	0.00186	1148.21	25.7	1162.6	18.56	1186.5	46.04	1186.5	46.04	3.22737	1.23798
	H7Bx_55_18	-	-	-	2.47626	0.06638	0.19964	0.00498	0.930552	0.08998	0.00206	1158.97	26.72	1265.1	19.38	1425	43.38	1425	43.38	18.6686	8.38886
	H7Bx_55_85	-	-	-	3.51469	0.08936	0.26743	0.00638	0.938327	0.09533	0.00214	1527.16	32.46	1530.5	20.1	1534.7	41.78	1534.7	41.78	0.49149	0.218418
	H7Bx_55_56	-	-	-	3.85391	0.10108	0.28793	0.00708	0.937525	0.0971	0.0022	1637.1	35.4	1604.1	21.14	1569.1	41.98	1569.1	41.98	-4.33373	-2.05726
	H7Bx_55_24	-	-	-	3.85594	0.09854	0.2767	0.00676	0.955994	0.10109	0.0022	1568.27	34.12	1604.5	20.6	1644.2	40.24	1644.2	40.24	4.61792	2.25789
	H7Bx_55_28	-	-	-	20.7397	0.51624	0.60711	0.01482	0.980691	0.24781	0.00522	2981.91	59.48	3126.5	24.12	3170.8	33.18	3170.8	33.18	5.95713	4.62462
	H7Bx_55_49	-	-	-	19.9526	0.49438	0.57098	0.01386	0.979673	0.25349	0.00532	2745.85	56.86	3089.1	23.96	3206.7	33	3206.7	33	14.3715	11.1117
	U-Pb LA-ICPMS detrital zircon data
	Sample Location: Mount Morgan Mineworks (sample name: MMD_19_001; Mount Morgan, Queensland)
	Formation: Razorback Beds
	Sample #	Th (PPM)	U (PPM)	Th/U	Pb207	±	Pb206	±	Error	Pb207	±	Pb206	± 2σ	Pb207	± 2σ	Pb207	± 2σ	Preferred	± 2σ	Pb-Pb/U-Pb Discordance (%)	U-Pb/U-Pb Discordance (%)
	MMD_19_001				/U235	2σ	/U238	2σ	Corr.	/Pb206	2σ	/U238 (Ma)	(Ma)	/U235	(Ma)	/Pb206	(Ma)	Age	(Ma)
	MMD_19_001_181	-	-	-	0.233	0.015	0.02964	0.00076	0.19985	0.0569	0.0036	188.3	4.8	212	12	420	140	188.3	4.8	-123.048	-12.5863
	MMD_19_001_43	-	-	-	0.2271	0.008	0.03059	0.00054	0.013948	0.0542	0.0019	194.3	3.3	207.4	6.6	361	77	194.3	3.3	-85.7952	-6.74215
	MMD_19_001_58	-	-	-	0.238	0.014	0.03077	0.00075	0.33929	0.0562	0.0029	195.3	4.7	217	12	430	120	195.3	4.7	-120.174	-11.1111
	MMD_19_001_170	-	-	-	0.246	0.011	0.03096	0.00062	0.086314	0.0573	0.0026	196.5	3.9	222.5	9	449	96	196.5	3.9	-128.499	-13.2316
	MMD_19_001_134	-	-	-	0.233	0.027	0.0318	0.0018	0.48561	0.0548	0.0051	202	11	212	22	380	210	202	11	-88.1188	-4.9505
	MMD_19_001_127	-	-	-	0.274	0.014	0.03505	0.00082	0.01827	0.0574	0.0031	222	5.1	246	12	430	110	222	5.1	-93.6937	-10.8108
	MMD_19_001_185	-	-	-	0.252	0.012	0.03608	0.00077	0.030593	0.0503	0.0025	228.4	4.8	226.2	9.8	154	100	228.4	4.8	32.5744	0.963222
	MMD_19_001_182	-	-	-	0.27	0.013	0.03668	0.00073	0.033452	0.0523	0.0024	232.2	4.5	240.8	10	260	98	232.2	4.5	-11.9724	-3.7037
	MMD_19_001_198	-	-	-	0.269	0.014	0.03691	0.00094	0.29853	0.0528	0.0026	233.6	5.9	241	11	310	110	233.6	5.9	-32.7055	-3.16781
	MMD_19_001_136	-	-	-	0.284	0.013	0.03697	0.00073	0.13444	0.0564	0.0026	234	4.5	251.8	10	397	93	234	4.5	-69.6581	-7.60684
	MMD_19_001_28	-	-	-	0.289	0.017	0.03714	0.00093	0.14782	0.0571	0.0033	235	5.8	255	14	410	120	235	5.8	-74.4681	-8.51064
	MMD_19_001_176	-	-	-	0.299	0.021	0.03725	0.00083	0.3743	0.0571	0.0035	235.7	5.2	262	16	410	120	235.7	5.2	-73.9499	-11.1583
	MMD_19_001_191	-	-	-	0.262	0.0097	0.03743	0.00075	0.014775	0.0503	0.002	236.9	4.6	235.4	7.9	171	82	236.9	4.6	27.8176	0.633179
	MMD_19_001_199	-	-	-	0.301	0.024	0.03747	0.0011	0.16291	0.0578	0.0046	237.1	6.5	264	19	390	160	237.1	6.5	-64.4876	-11.3454
	MMD_19_001_156	-	-	-	0.275	0.015	0.0375	0.00081	0.10065	0.0536	0.0029	237.3	5	247	12	310	110	237.3	5	-30.6363	-4.08765
	MMD_19_001_201	-	-	-	0.288	0.013	0.03752	0.00082	0.11618	0.0552	0.0026	237.4	5.1	257.5	10	370	100	237.4	5.1	-55.8551	-8.46672
	MMD_19_001_33	-	-	-	0.28	0.023	0.0375	0.0013	0.13761	0.0556	0.0047	237.4	8.2	249	18	390	180	237.4	8.2	-64.2797	-4.88627
	MMD_19_001_187	-	-	-	0.304	0.013	0.03763	0.00082	0.003382	0.0585	0.0027	238.1	5.1	268.3	10	480	99	238.1	5.1	-101.596	-12.6837
	MMD_19_001_200	-	-	-	0.287	0.016	0.0377	0.0012	0.20707	0.0554	0.0032	238.7	7.7	256	12	390	120	238.7	7.7	-63.385	-7.24759
	MMD_19_001_163	-	-	-	0.2597	0.011	0.03779	0.00067	0.11212	0.0498	0.002	239.1	4.2	233.3	8.5	150	81	239.1	4.2	37.2647	2.42576
	MMD_19_001_61	-	-	-	0.285	0.014	0.0378	0.00086	0.09655	0.0552	0.0027	239.2	5.4	253.2	11	378	110	239.2	5.4	-58.0268	-5.85284
	MMD_19_001_184	-	-	-	0.277	0.015	0.03786	0.00087	0.15164	0.0526	0.0029	239.5	5.4	247	12	260	120	239.5	5.4	-8.5595	-3.13152
	MMD_19_001_16	-	-	-	0.279	0.017	0.03788	0.00095	0.12498	0.0541	0.0032	239.6	5.9	249	13	290	120	239.6	5.9	-21.0351	-3.92321
	MMD_19_001_109	-	-	-	0.2724	0.0094	0.03795	0.00068	0.2099	0.0527	0.0017	240.1	4.2	243.9	7.5	283	72	240.1	4.2	-17.8676	-1.58267
	MMD_19_001_32	-	-	-	0.288	0.012	0.03799	0.00078	0.021366	0.0558	0.0024	240.3	4.8	256.3	9.7	396	91	240.3	4.8	-64.794	-6.65834
	MMD_19_001_162	-	-	-	0.2853	0.01	0.03805	0.00069	0.11798	0.0543	0.0018	240.7	4.3	254.1	7.8	347	74	240.7	4.3	-44.1629	-5.5671
	MMD_19_001_183	-	-	-	0.294	0.014	0.03816	0.00085	0.17573	0.0555	0.0026	241.4	5.3	260.2	11	383	100	241.4	5.3	-58.6578	-7.7879
	MMD_19_001_102	-	-	-	0.2725	0.0093	0.03821	0.00066	0.050018	0.0518	0.0017	241.7	4.1	244	7.4	245	71	241.7	4.1	-1.36533	-0.951593
	MMD_19_001_86	-	-	-	0.292	0.014	0.03827	0.00077	0.035748	0.0553	0.0025	242	4.8	258.4	11	371	98	242	4.8	-53.3058	-6.77686
	MMD_19_001_132	-	-	-	0.2654	0.011	0.03839	0.00075	0.037007	0.0505	0.0021	242.8	4.6	238.6	9	185	87	242.8	4.6	23.8056	1.72982
	MMD_19_001_9	-	-	-	0.2896	0.011	0.03843	0.00077	0.40955	0.0553	0.0018	243.1	4.8	257.9	8.3	404	73	243.1	4.8	-66.1868	-6.08803
	MMD_19_001_60	-	-	-	0.2709	0.0096	0.03845	0.00068	0.1611	0.0514	0.0017	243.2	4.2	242.7	7.6	229	72	243.2	4.2	5.83882	0.205592
	MMD_19_001_168	-	-	-	0.309	0.017	0.0385	0.0009	0.16514	0.0583	0.0032	243.5	5.6	271	13	470	120	243.5	5.6	-93.0185	-11.2936
	MMD_19_001_161	-	-	-	0.301	0.02	0.03857	0.001	0.2685	0.0573	0.0037	243.9	6.3	267	16	400	130	243.9	6.3	-64.0016	-9.47109
	MMD_19_001_206	-	-	-	0.2707	0.0076	0.03857	0.00063	0.17304	0.0502	0.0013	243.9	3.9	242.9	6.1	190	58	243.9	3.9	22.0992	0.410004
	MMD_19_001_139	-	-	-	0.289	0.025	0.0386	0.0013	0.21734	0.0539	0.0042	244	8	256	19	360	180	244	8	-47.541	-4.91803
	MMD_19_001_55	-	-	-	0.282	0.015	0.03859	0.00083	0.19865	0.0538	0.0027	244	5.2	251	12	275	110	244	5.2	-12.7049	-2.86885
	MMD_19_001_72	-	-	-	0.2649	0.0079	0.03857	0.00064	0.12616	0.0501	0.0014	244	4	238.7	6.2	187	60	244	4	23.3607	2.17213
	MMD_19_001_56	-	-	-	0.285	0.015	0.03865	0.00087	0.044333	0.0544	0.0029	244.4	5.4	254	12	350	120	244.4	5.4	-43.2079	-3.92799
	MMD_19_001_1	-	-	-	0.308	0.021	0.0387	0.0014	0.48838	0.0591	0.0035	244.6	8.7	272	17	540	130	244.6	8.7	-120.769	-11.202
	MMD_19_001_29	-	-	-	0.2682	0.008	0.03869	0.00064	0.27082	0.0505	0.0014	244.7	4	241.3	6.6	202	60	244.7	4	17.4499	1.38946
	MMD_19_001_44	-	-	-	0.2738	0.0096	0.03882	0.00068	0.14539	0.0514	0.0017	245.5	4.2	245.6	7.8	234	72	245.5	4.2	4.68432	-0.0407332
	MMD_19_001_189	-	-	-	0.286	0.012	0.03877	0.00072	0.20999	0.0526	0.0022	245.6	4.6	254	9.7	272	88	245.6	4.6	-10.7492	-3.4202
	MMD_19_001_173	-	-	-	0.2966	0.0088	0.03887	0.00068	0.10322	0.0554	0.0016	245.8	4.2	263.5	6.9	409	65	245.8	4.2	-66.3954	-7.20098
	MMD_19_001_76	-	-	-	0.3022	0.011	0.03892	0.00075	0.15814	0.0568	0.0021	246.1	4.6	267	8.9	438	79	246.1	4.6	-77.9764	-8.49248
	MMD_19_001_87	-	-	-	0.2703	0.0099	0.03911	0.00075	0.20664	0.0505	0.0017	247.2	4.6	242.7	7.8	189	71	247.2	4.6	23.5437	1.82039
	MMD_19_001_71	-	-	-	0.282	0.013	0.03912	0.00085	0.022855	0.0532	0.0026	247.3	5.3	252.1	11	257	100	247.3	5.3	-3.92236	-1.94096
	MMD_19_001_207	-	-	-	0.315	0.024	0.0391	0.0016	0.23209	0.0585	0.0044	247.4	9.7	276	18	490	170	247.4	9.7	-98.0598	-11.5602
	MMD_19_001_196	-	-	-	0.308	0.015	0.0392	0.00094	0.34122	0.056	0.0025	247.8	5.8	271	12	425	100	247.8	5.8	-71.5093	-9.36239
	MMD_19_001_81	-	-	-	0.296	0.017	0.0392	0.00083	0.30373	0.0553	0.0031	247.9	5.1	263	14	350	120	247.9	5.1	-41.186	-6.09117
	MMD_19_001_89	-	-	-	0.314	0.015	0.0394	0.00083	0.24707	0.0584	0.0027	249.1	5.2	276	12	495	99	249.1	5.2	-98.7154	-10.7989
	MMD_19_001_13	-	-	-	0.273	0.013	0.03945	0.00081	0.056204	0.0511	0.0024	249.4	5	244.2	10	193	98	249.4	5	22.6143	2.085
	MMD_19_001_157	-	-	-	0.316	0.016	0.03955	0.00089	0.0085554	0.0585	0.0031	250	5.5	277	12	460	110	250	5.5	-84	-10.8
	MMD_19_001_34	-	-	-	0.278	0.015	0.03962	0.0009	0.22634	0.0515	0.0027	250.4	5.6	246	12	200	110	250.4	5.6	20.1278	1.75719
	MMD_19_001_152	-	-	-	0.3	0.012	0.03967	0.00073	0.080728	0.055	0.0022	250.8	4.5	264.7	9.3	363	84	250.8	4.5	-44.7368	-5.54226
	MMD_19_001_103	-	-	-	0.329	0.016	0.03988	0.00083	0.031314	0.0604	0.0029	252	5.1	288	12	536	110	252	5.1	-112.698	-14.2857
	MMD_19_001_143	-	-	-	0.308	0.016	0.03991	0.00089	0.086804	0.0565	0.0029	252.2	5.5	271	12	380	110	252.2	5.5	-50.6741	-7.4544
	MMD_19_001_88	-	-	-	0.302	0.016	0.03993	0.001	0.024724	0.0553	0.0029	252.4	6.2	266	12	380	120	252.4	6.2	-50.5547	-5.38827
	MMD_19_001_99	-	-	-	0.298	0.02	0.03994	0.00099	0.12379	0.055	0.0037	252.4	6.1	260	15	280	130	252.4	6.1	-10.935	-3.01109
	MMD_19_001_38	-	-	-	0.309	0.012	0.04002	0.00074	0.11632	0.0566	0.0022	252.9	4.6	272.5	9.4	443	85	252.9	4.6	-75.1681	-7.7501
	MMD_19_001_84	-	-	-	0.2906	0.0079	0.04001	0.00062	0.11594	0.0529	0.0013	252.9	3.9	258.7	6.2	307	56	252.9	3.9	-21.3919	-2.2934
	MMD_19_001_74	-	-	-	0.304	0.016	0.04013	0.00089	0.11688	0.0558	0.0029	253.6	5.5	268	12	380	110	253.6	5.5	-49.8423	-5.67823
	MMD_19_001_10	-	-	-	0.2904	0.011	0.04017	0.00076	0.11096	0.0526	0.002	253.9	4.7	258.6	8.7	275	82	253.9	4.7	-8.31036	-1.85112
	MMD_19_001_46	-	-	-	0.2888	0.008	0.0402	0.00065	0.26987	0.05227	0.0013	254.1	4	257.3	6.3	282	56	254.1	4	-10.9799	-1.25935
	MMD_19_001_77	-	-	-	0.2813	0.0077	0.04024	0.00064	0.046271	0.05089	0.0013	254.3	4	251.4	6.1	221	58	254.3	4	13.0948	1.14039
	MMD_19_001_178	-	-	-	0.281	0.013	0.04026	0.00089	0.20796	0.0508	0.0024	254.4	5.5	249.7	10	184	95	254.4	5.5	27.673	1.84748
	MMD_19_001_39	-	-	-	0.318	0.018	0.0403	0.0009	0.09886	0.0578	0.0032	254.6	5.6	280	14	450	110	254.6	5.6	-76.7478	-9.97643
	MMD_19_001_50	-	-	-	0.291	0.018	0.0405	0.0011	0.18088	0.053	0.0033	255.6	7.1	258	14	270	130	255.6	7.1	-5.6338	-0.938967
	MMD_19_001_49	-	-	-	0.2876	0.0079	0.04056	0.00068	0.29435	0.05157	0.0013	256.3	4.2	256.3	6.2	255	56	256.3	4.2	0.507218	0
	MMD_19_001_78	-	-	-	0.328	0.02	0.04071	0.00092	0.15748	0.058	0.0034	257.2	5.7	286	15	470	130	257.2	5.7	-82.7372	-11.1975
	MMD_19_001_52	-	-	-	0.291	0.02	0.04077	0.0011	0.25317	0.0522	0.0034	257.5	6.6	256	16	210	130	257.5	6.6	18.4466	0.582524
	MMD_19_001_166	-	-	-	0.287	0.011	0.04078	0.00074	0.23159	0.051	0.0018	257.6	4.6	255.1	8.5	208	75	257.6	4.6	19.2547	0.970497
	MMD_19_001_107	-	-	-	0.304	0.014	0.04086	0.00087	0.13745	0.0544	0.0026	258.1	5.4	268.5	11	348	100	258.1	5.4	-34.8315	-4.02945
	MMD_19_001_2	-	-	-	0.305	0.018	0.04093	0.001	0.16216	0.0544	0.0029	258.5	6.3	269	14	310	110	258.5	6.3	-19.9226	-4.0619
	MMD_19_001_59	-	-	-	0.2858	0.009	0.04092	0.00066	0.21057	0.0511	0.0015	258.5	4.1	255.3	6.9	222	63	258.5	4.1	14.1199	1.23791
	MMD_19_001_70	-	-	-	0.293	0.014	0.04092	0.00079	0.0724	0.0524	0.0024	258.5	4.9	259.4	11	243	96	258.5	4.9	5.99613	-0.348162
	MMD_19_001_111	-	-	-	0.314	0.014	0.04109	0.00083	0.02596	0.0562	0.0026	259.6	5.1	276.2	11	388	95	259.6	5.1	-49.4607	-6.39445
	MMD_19_001_153	-	-	-	0.317	0.016	0.0411	0.00084	-0.10809	0.0565	0.0029	259.6	5.2	277	12	370	110	259.6	5.2	-42.527	-6.70262
	MMD_19_001_14	-	-	-	0.317	0.027	0.0411	0.0014	0.092832	0.0561	0.0046	259.7	8.7	279	21	390	180	259.7	8.7	-50.1733	-7.43165
	MMD_19_001_47	-	-	-	0.281	0.021	0.0413	0.0013	0.039151	0.0493	0.0036	260.8	8	250	16	150	160	260.8	8	42.4847	4.1411
	MMD_19_001_124	-	-	-	0.2904	0.011	0.04149	0.00076	0.012783	0.0513	0.002	262	4.7	257.7	8.9	212	80	262	4.7	19.084	1.64122
	MMD_19_001_195	-	-	-	0.344	0.015	0.04149	0.00091	0.19652	0.0599	0.0026	262.1	5.6	300	12	564	95	262.1	5.6	-115.185	-14.4601
	MMD_19_001_97	-	-	-	0.3225	0.012	0.04157	0.00075	0.091794	0.0568	0.0021	262.5	4.6	282.7	9	432	74	262.5	4.6	-64.5714	-7.69524
	MMD_19_001_85	-	-	-	0.32	0.013	0.0416	0.00083	0.11767	0.0562	0.0023	262.7	5.1	280.2	10	398	86	262.7	5.1	-51.5036	-6.66159
	MMD_19_001_11	-	-	-	0.3	0.012	0.04161	0.00074	-0.011967	0.0525	0.0021	262.8	4.5	264.8	9.6	271	87	262.8	4.5	-3.12024	-0.761035
	MMD_19_001_69	-	-	-	0.33	0.027	0.0418	0.0014	0.069241	0.0584	0.0051	264	8.6	287	20	440	170	264	8.6	-66.6667	-8.71212
	MMD_19_001_122	-	-	-	0.3414	0.012	0.04198	0.00085	0.07727	0.0596	0.0021	265.1	5.3	297.5	8.9	556	76	265.1	5.3	-109.732	-12.2218
	MMD_19_001_54	-	-	-	0.316	0.014	0.04214	0.00095	0.26973	0.055	0.0023	266.1	5.8	277.8	11	387	95	266.1	5.8	-45.434	-4.39684
	MMD_19_001_79	-	-	-	0.311	0.014	0.04215	0.00082	0.16001	0.0539	0.0023	266.1	5.1	273.7	11	326	88	266.1	5.1	-22.5103	-2.85607
	MMD_19_001_135	-	-	-	0.349	0.013	0.04218	0.00078	0.0047064	0.0604	0.0023	266.3	4.8	303.9	9.7	574	81	266.3	4.8	-115.546	-14.1194
	MMD_19_001_45	-	-	-	0.345	0.022	0.04229	0.001	0.15923	0.0598	0.0038	266.9	6.2	298	17	500	130	266.9	6.2	-87.3361	-11.6523
	MMD_19_001_138	-	-	-	0.326	0.023	0.04234	0.001	0.19192	0.0565	0.0039	267.3	6.2	285	17	400	140	267.3	6.2	-49.6446	-6.62177
	MMD_19_001_90	-	-	-	0.312	0.018	0.04247	0.00096	0.026579	0.0539	0.0032	268.1	5.9	274	14	260	120	268.1	5.9	3.02126	-2.20067
	MMD_19_001_203	-	-	-	0.3275	0.011	0.04257	0.00076	0.19585	0.0549	0.0018	268.7	4.7	286.8	8.5	371	70	268.7	4.7	-38.0722	-6.73614
	MMD_19_001_27	-	-	-	0.334	0.013	0.04268	0.00082	0.054881	0.0571	0.0022	269.4	5.1	291.1	9.9	445	84	269.4	5.1	-65.1819	-8.05494
	MMD_19_001_31	-	-	-	0.311	0.018	0.04272	0.0011	-0.0096473	0.0542	0.0034	269.6	6.7	275	15	300	130	269.6	6.7	-11.276	-2.00297
	MMD_19_001_126	-	-	-	0.33	0.012	0.04293	0.00077	0.27423	0.056	0.002	271	4.8	288.4	9.3	425	76	271	4.8	-56.8266	-6.42066
	MMD_19_001_68	-	-	-	0.353	0.015	0.04295	0.00087	0.3782	0.06	0.0024	271	5.4	305.1	11	544	87	271	5.4	-100.738	-12.583
	MMD_19_001_159	-	-	-	0.343	0.033	0.043	0.0017	0.24806	0.0594	0.0057	271.1	10	296	24	490	210	271.1	10	-80.7451	-9.1848
	MMD_19_001_155	-	-	-	0.301	0.014	0.04304	0.00088	0.13674	0.051	0.0023	271.6	5.5	265.4	11	185	93	271.6	5.5	31.8851	2.28277
	MMD_19_001_41	-	-	-	0.352	0.017	0.0431	0.00088	-0.048022	0.059	0.0031	272	5.4	305	13	510	110	272	5.4	-87.5	-12.1324
	MMD_19_001_158	-	-	-	0.362	0.026	0.0432	0.0011	0.11592	0.0618	0.0046	272.6	7.1	313	20	550	160	272.6	7.1	-101.761	-14.8202
	MMD_19_001_24	-	-	-	0.313	0.019	0.04326	0.001	0.16937	0.0533	0.0033	272.9	6.3	274	15	250	130	272.9	6.3	8.39135	-0.403078
	MMD_19_001_150	-	-	-	0.3357	0.012	0.04348	0.00081	0.15982	0.0559	0.0019	274.3	5	293.3	9	421	75	274.3	5	-53.4816	-6.92672
	MMD_19_001_113	-	-	-	0.3408	0.011	0.04356	0.00075	0.11008	0.0572	0.0018	274.8	4.6	296.9	8.5	458	70	274.8	4.6	-66.6667	-8.04221
	MMD_19_001_119	-	-	-	0.357	0.02	0.0438	0.00095	0.15545	0.0593	0.0031	276.2	5.9	306	15	500	110	276.2	5.9	-81.0282	-10.7893
	MMD_19_001_112	-	-	-	0.3275	0.012	0.04389	0.00082	0.23379	0.0548	0.0019	276.9	5.1	286.9	9.3	375	78	276.9	5.1	-35.428	-3.61141
	MMD_19_001_40	-	-	-	0.337	0.015	0.04391	0.00091	0.14654	0.0565	0.0026	277	5.6	293	12	402	93	277	5.6	-45.1264	-5.77617
	MMD_19_001_57	-	-	-	0.328	0.014	0.044	0.00091	0.094292	0.0547	0.0023	277.5	5.6	287.1	11	370	91	277.5	5.6	-33.3333	-3.45946
	MMD_19_001_123	-	-	-	0.337	0.019	0.04409	0.00092	0.15336	0.0555	0.0029	278.1	5.6	293	14	380	110	278.1	5.6	-36.6415	-5.35778
	MMD_19_001_186	-	-	-	0.332	0.014	0.04419	0.00086	0.18764	0.054	0.0022	278.7	5.3	290.4	11	326	89	278.7	5.3	-16.9717	-4.19806
	MMD_19_001_110	-	-	-	0.3364	0.011	0.04424	0.00075	0.061422	0.0556	0.0018	279.1	4.6	294.5	8.5	413	70	279.1	4.6	-47.9756	-5.51774
	MMD_19_001_131	-	-	-	0.345	0.013	0.04429	0.00076	-0.12419	0.0567	0.0022	279.4	4.7	299.6	9.9	431	82	279.4	4.7	-54.2591	-7.22978
	MMD_19_001_48	-	-	-	0.357	0.024	0.0444	0.0013	0.25112	0.0584	0.0039	279.6	8.1	306	18	440	140	279.6	8.1	-57.3677	-9.44206
	MMD_19_001_188	-	-	-	0.3659	0.012	0.04442	0.00077	0.28293	0.059	0.0018	280.2	4.8	316.5	9.2	540	66	280.2	4.8	-92.7195	-12.955
	MMD_19_001_98	-	-	-	0.342	0.016	0.04445	0.00089	0.29369	0.0562	0.0024	280.3	5.5	297	12	396	91	280.3	5.5	-41.2772	-5.9579
	MMD_19_001_64	-	-	-	0.34	0.015	0.0445	0.00083	0.13822	0.056	0.0023	280.6	5.1	295.6	11	407	88	280.6	5.1	-45.0463	-5.34569
	MMD_19_001_18	-	-	-	0.3251	0.011	0.0445	0.00093	0.33417	0.0535	0.0016	280.7	5.7	285.3	8.3	326	68	280.7	5.7	-16.1382	-1.63876
	MMD_19_001_82	-	-	-	0.3533	0.011	0.04513	0.00082	0.12514	0.0576	0.0017	284.5	5.1	306.8	8.3	495	66	284.5	5.1	-73.9895	-7.83831
	MMD_19_001_106	-	-	-	0.32	0.013	0.0455	0.00095	0.18346	0.0515	0.002	286.8	5.8	280.8	10	230	84	286.8	5.8	19.8047	2.09205
	MMD_19_001_20	-	-	-	0.362	0.014	0.04562	0.00078	0.35156	0.0576	0.002	287.6	4.8	312.9	10	488	75	287.6	4.8	-69.6801	-8.79694
	MMD_19_001_22	-	-	-	0.333	0.013	0.04573	0.00084	0.10479	0.053	0.002	288.2	5.2	292.4	9.6	305	79	288.2	5.2	-5.82929	-1.45732
	MMD_19_001_151	-	-	-	0.3593	0.012	0.04604	0.0008	0.01253	0.0568	0.0019	290.1	5	310.8	9	444	72	290.1	5	-53.0507	-7.13547
	MMD_19_001_164	-	-	-	0.3431	0.011	0.04608	0.00077	0.25891	0.0538	0.0016	290.4	4.8	298.8	8.3	338	63	290.4	4.8	-16.3912	-2.89256
	MMD_19_001_36	-	-	-	0.382	0.014	0.04651	0.00086	-0.062302	0.0598	0.0023	293	5.3	328.9	11	569	87	293	5.3	-94.198	-12.2526
	MMD_19_001_120	-	-	-	0.328	0.014	0.0467	0.0012	0.377	0.0517	0.0021	294.1	7.6	287	11	227	84	294.1	7.6	22.8154	2.41414
	MMD_19_001_80	-	-	-	0.41	0.014	0.0482	0.001	0.25287	0.0617	0.0021	303.4	6.2	348.4	10	636	74	303.4	6.2	-109.624	-14.8319
	MMD_19_001_95	-	-	-	0.3818	0.012	0.04843	0.00085	0.24652	0.0576	0.0017	304.8	5.2	327.7	8.9	493	66	304.8	5.2	-61.7454	-7.51312
	MMD_19_001_137	-	-	-	0.369	0.01	0.04855	0.00076	0.28642	0.05516	0.0013	305.6	4.7	318.5	7.4	401	55	305.6	4.7	-31.2173	-4.2212
	MMD_19_001_205	-	-	-	0.3704	0.011	0.0486	0.00082	0.27823	0.0546	0.0015	305.9	5.1	320.8	8.5	388	59	305.9	5.1	-26.8388	-4.87087
	MMD_19_001_63	-	-	-	0.435	0.02	0.05088	0.0011	0.028914	0.0631	0.003	319.9	6.6	365	14	647	100	319.9	6.6	-102.251	-14.0982
	MMD_19_001_142	-	-	-	0.3778	0.01	0.05186	0.00082	0.20975	0.05296	0.0013	325.9	5	325	7.4	316	53	325.9	5	3.03774	0.276158
	MMD_19_001_96	-	-	-	0.449	0.018	0.05517	0.0011	-0.073287	0.06	0.0026	346.1	6.7	375	13	547	93	346.1	6.7	-58.0468	-8.35019
	MMD_19_001_91	-	-	-	0.557	0.017	0.06736	0.0012	0.21701	0.0598	0.0016	420.2	7.3	448.7	11	596	64	420.2	7.3	-41.8372	-6.78248
	MMD_19_001_37	-	-	-	0.548	0.018	0.07134	0.0013	0.27651	0.0555	0.0017	444.2	7.7	442.3	12	425	67	444.2	7.7	4.32238	0.427735
	U-Pb LA-ICPMS detrital zircon data
	Sample Location: Cockatoo, Queensland (sample name: QMF_7882; Cockatoo, Queensland)
	Formation: Westgrove Ironstone Member, Evergreen Formation
	Sample #	Th (PPM)	U (PPM)	Th/U	Pb207	±	Pb206	±	Error	Pb207	±	Pb206	± 2σ	Pb207	± 2σ	Pb207	± 2σ	Preferred	± 2σ	Pb-Pb/U-Pb Discordance (%)	U-Pb/U-Pb Discordance (%)
	QMF_7882				/U235	2σ	/U238	2σ	Corr.	/Pb206	2σ	/U238 (Ma)	(Ma)	/U235	(Ma)	/Pb206	(Ma)	Age	(Ma)
	QMF7882-4	-	-	-	0.1813	0.0077	0.02676	0.00058	0.510327	0.0494	0.0018	170.253	3.6	169.5	6.6	164	79	170.253	3.6	-3.81308	-0.444511
	QMF7882-17	-	-	-	0.1842	0.007	0.02765	0.00057	0.542464	0.0489	0.0015	175.975	3.6	171.4	6	137	69	175.975	3.6	-28.4487	-2.66899
	QMF7882-38	-	-	-	0.1954	0.01	0.02788	0.00071	0.497611	0.0514	0.0025	176.874	4.4	180	8.7	200	100	176.874	4.4	11.5631	1.73681
	QMF7882-34	-	-	-	0.2036	0.0098	0.02799	0.0007	0.519573	0.0521	0.0023	177.41	4.4	187.1	8.2	269	95	177.41	4.4	34.0482	5.17888
	QMF7882-69	-	-	-	0.221	0.015	0.02852	0.001	0.516597	0.0577	0.0033	179.476	6.5	201.5	12	410	120	179.476	6.5	56.2253	10.9299
	QMF7882-9	-	-	-	0.2026	0.0068	0.02911	0.00058	0.593631	0.0507	0.0014	184.765	3.7	187	5.8	214	62	184.765	3.7	13.6611	1.19503
	QMF7882-18	-	-	-	0.2091	0.0079	0.02926	0.00064	0.578939	0.0531	0.0017	185.154	4	192.5	6.6	313	70	185.154	4	40.8454	3.81621
	QMF7882-46	-	-	-	0.2012	0.0077	0.02933	0.0007	0.623625	0.0502	0.0016	186.264	4.4	185.8	6.5	182	70	186.264	4.4	-2.34305	-0.249925
	QMF7882-44	-	-	-	0.2077	0.0068	0.02965	0.00061	0.628395	0.0508	0.0013	188.137	3.8	191.3	5.7	215	55	188.137	3.8	12.4945	1.65353
	QMF7882-36	-	-	-	0.215	0.0078	0.03004	0.00065	0.596427	0.0517	0.0015	190.374	4	197.6	6.5	258	64	190.374	4	26.2115	3.65671
	QMF7882-8	-	-	-	0.2441	0.0087	0.03106	0.0007	0.632332	0.0565	0.0016	195.6	4.4	221.3	7.1	460	63	195.6	4.4	57.4783	11.6133
	QMF7882-11	-	-	-	0.2482	0.0077	0.03478	0.00071	0.658021	0.0523	0.0012	219.918	4.4	225.2	6.2	289	52	219.918	4.4	23.9037	2.34529
	QMF7882-24	-	-	-	0.2598	0.0077	0.037	0.00073	0.665686	0.0514	0.0011	234.053	4.5	234.2	6.2	244	47	234.053	4.5	4.07677	0.0629026
	QMF7882-67	-	-	-	0.2852	0.015	0.03896	0.0013	0.634428	0.0535	0.0018	245.661	8.2	254.7	12	313	71	245.661	8.2	21.514	3.54881
	QMF7882-6	-	-	-	0.2704	0.0083	0.03919	0.00081	0.673346	0.0506	0.0012	247.98	5	242.9	6.7	210	53	247.98	5	-18.0856	-2.09128
	QMF7882-25	-	-	-	0.2843	0.0098	0.04033	0.00082	0.589843	0.0516	0.0014	254.788	5.1	253.9	7.8	250	58	254.788	5.1	-1.91511	-0.349655
	QMF7882-14	-	-	-	0.304	0.0089	0.04176	0.00083	0.678893	0.0533	0.0011	263.152	5.1	269.2	6.9	344	45	263.152	5.1	23.5022	2.24652
	QMF7882-52	-	-	-	0.3313	0.011	0.04567	0.001	0.659474	0.0525	0.0014	287.726	6.3	289.9	8.5	307	59	287.726	6.3	6.27811	0.749847
	QMF7882-35	-	-	-	0.353	0.01	0.04676	0.001	0.754919	0.05472	0.00097	293.693	6.4	306.5	7.8	391	40	293.693	6.4	24.8868	4.17854
	QMF7882-45	-	-	-	0.339	0.012	0.04745	0.0012	0.714436	0.0524	0.0015	298.813	7.2	297.6	8.8	300	64	298.813	7.2	0.395702	-0.407558
	QMF7882-13	-	-	-	0.366	0.015	0.05054	0.0012	0.579343	0.0536	0.0019	317.504	7.1	317.4	11	334	74	317.504	7.1	4.93893	-0.0327597
	QMF7882-32	-	-	-	0.385	0.012	0.05105	0.001	0.628469	0.0548	0.0012	320.188	6.4	330.1	8.7	387	47	320.188	6.4	17.2642	3.00282
	QMF7882-39	-	-	-	0.3796	0.012	0.052	0.0012	0.73	0.0526	0.0012	326.93	7.2	327.6	8.4	311	50	326.93	7.2	-5.12207	0.20463
	QMF7882-10	-	-	-	0.3853	0.011	0.05247	0.001	0.667568	0.0533	0.0011	329.556	6.2	330.8	8.5	343	46	329.556	6.2	3.9196	0.37613
	QMF7882-49	-	-	-	0.442	0.016	0.05877	0.0013	0.611069	0.0545	0.0014	367.886	7.6	370.7	11	395	61	367.886	7.6	6.86423	0.759026
	QMF7882-29	-	-	-	0.4478	0.013	0.059	0.0012	0.7006	0.055	0.001	369.076	7.2	375.1	9	408	44	369.076	7.2	9.54011	1.60588
	QMF7882-33	-	-	-	0.488	0.016	0.05992	0.0014	0.712617	0.0583	0.0013	373.227	8.4	403.6	11	534	49	373.227	8.4	30.1073	7.52555
	QMF7882-30	-	-	-	0.456	0.014	0.06116	0.0013	0.692329	0.0545	0.0011	382.574	7.8	380.8	10	377	48	382.574	7.8	-1.47854	-0.465889
	QMF7882-5	-	-	-	0.4729	0.014	0.06221	0.0012	0.651572	0.0554	0.0013	388.597	7.4	392.9	9.7	414	50	388.597	7.4	6.13608	1.09528
	QMF7882-41	-	-	-	0.4984	0.015	0.06472	0.0014	0.718747	0.05597	0.00099	403.697	8.4	410.8	9.8	448	39	403.697	8.4	9.88901	1.72901
	QMF7882-3	-	-	-	0.4876	0.014	0.06471	0.0012	0.645871	0.0555	0.001	403.866	7.5	402.8	9.3	420	42	403.866	7.5	3.84151	-0.264563
	QMF7882-7	-	-	-	0.487	0.016	0.06473	0.0014	0.658311	0.0548	0.0014	404.33	8.5	402.3	11	391	58	404.33	8.5	-3.40925	-0.504643
	QMF7882-20	-	-	-	0.491	0.017	0.06489	0.0014	0.623136	0.0554	0.0014	405.017	8.2	404.3	12	439	59	405.017	8.2	7.7411	-0.177239
	QMF7882-27	-	-	-	0.4953	0.015	0.06514	0.0013	0.658981	0.0555	0.0012	406.498	7.8	408.2	10	427	48	406.498	7.8	4.80143	0.416982
	QMF7882-23	-	-	-	0.4984	0.014	0.06561	0.0013	0.70538	0.05539	0.00096	409.429	7.6	410.5	9.6	431	38	409.429	7.6	5.00495	0.260983
	QMF7882-40	-	-	-	0.5	0.017	0.06641	0.0014	0.620034	0.0545	0.0014	414.769	8.4	411.1	11	363	57	414.769	8.4	-14.2614	-0.892426
	QMF7882-22	-	-	-	0.5186	0.014	0.06848	0.0013	0.703208	0.05595	0.00092	426.691	8	423.5	9.7	451	36	426.691	8	5.39012	-0.753377
	QMF7882-51	-	-	-	0.532	0.016	0.06878	0.0015	0.725138	0.0558	0.0011	428.6	9.1	434.3	11	434	44	428.6	9.1	1.24429	1.3125
	QMF7882-16	-	-	-	0.56	0.017	0.07322	0.0015	0.67484	0.0562	0.0012	455.46	8.9	452.6	12	453	45	455.46	8.9	-0.543094	-0.631952
	QMF7882-26	-	-	-	0.599	0.022	0.0743	0.0017	0.622966	0.0582	0.0017	460.925	10	477	14	534	63	460.925	10	13.6844	3.36999
	QMF7882-42	-	-	-	0.6176	0.017	0.0774	0.0016	0.750996	0.05689	0.001	480.486	9.3	488.3	10	495	39	480.486	9.3	2.93214	1.60027
	QMF7882-43	-	-	-	0.656	0.028	0.0784	0.0019	0.567784	0.0599	0.0021	484.802	11	513	17	589	76	484.802	11	17.6907	5.4967
	QMF7882-50	-	-	-	0.618	0.018	0.0783	0.0017	0.745424	0.0576	0.00095	485.535	10	488.8	11	516	37	485.535	10	5.90405	0.667936
	QMF7882-31	-	-	-	0.626	0.02	0.07865	0.0016	0.636745	0.0578	0.0014	487.54	9.8	492.1	12	520	52	487.54	9.8	6.24229	0.926617
	QMF7882-19	-	-	-	0.742	0.022	0.0847	0.0018	0.716754	0.0652	0.0011	519.525	11	563.6	13	774	37	519.525	11	32.8779	7.8202
	QMF7882-21	-	-	-	0.673	0.024	0.0843	0.0019	0.632019	0.059	0.0014	520.984	11	521	14	571	52	520.984	11	8.75929	0.00298264
	QMF7882-28	-	-	-	0.713	0.022	0.08726	0.0018	0.668535	0.0597	0.0013	538.384	10	546.6	13	585	49	538.384	10	7.96854	1.5031
	QMF7882-2	-	-	-	0.791	0.023	0.0898	0.0019	0.727656	0.0645	0.0013	550.507	12	595	12	761	40	550.507	12	27.6601	7.47788
	QMF7882-1	-	-	-	0.752	0.019	0.09121	0.0017	0.737685	0.05969	0.00074	562.149	10	569.7	11	593	26	562.149	10	5.20252	1.32543
	QMF7882-47	-	-	-	1.145	0.035	0.1141	0.0024	0.688118	0.0719	0.0012	688.983	14	775	17	976	34	688.983	14	29.4075	11.099
	QMF7882-48	-	-	-	4.075	0.13	0.2946	0.0082	0.8725	0.1029	0.0022	1663.19	41	1653	26	1676	38	1676	38	0.764421	-0.616353
	QMF7882-37	-	-	-	4.328	0.11	0.2895	0.0058	0.788268	0.1071	0.0011	1627.62	29	1698.2	20	1750	19	1750	19	6.99289	4.15591
	U-Pb LA-ICPMS detrital zircon data
	Sample Location: Injune, Queensland (sample name: QMF_1659; Injune, Queensland)
	Formation: Walloon Coal Measures
	Sample #	Th (PPM)	U (PPM)	Th/U	Pb207	±	Pb206	±	Error	Pb207	±	Pb206	± 2σ	Pb207	± 2σ	Pb207	± 2σ	Preferred	± 2σ	Pb-Pb/U-Pb Discordance (%)	U-Pb/U-Pb Discordance (%)
	QMF_1659				/U235	2σ	/U238	2σ	Corr.	/Pb206	2σ	/U238 (Ma)	(Ma)	/U235	(Ma)	/Pb206	(Ma)	Age	(Ma)
	QMF1659-33	-	-	-	0.1737	0.0063	0.02538	0.00054	0.586626	0.05	0.0015	161.425	3.4	162.3	5.4	176	65	161.425	3.4	8.28133	0.539217
	QMF1659-44	-	-	-	0.1684	0.007	0.02543	0.00056	0.529768	0.049	0.0017	161.942	3.5	158.2	6	142	74	161.942	3.5	-14.0438	-2.36544
	QMF1659-17	-	-	-	0.1789	0.0056	0.02547	0.00053	0.664767	0.0497	0.0011	162.053	3.3	167.2	4.8	174	48	162.053	3.3	6.86597	3.07822
	QMF1659-1	-	-	-	0.1746	0.0085	0.02557	0.0006	0.481999	0.051	0.0025	162.42	3.8	162.9	7.4	200	100	162.42	3.8	18.7898	0.294435
	QMF1659-65	-	-	-	0.1905	0.0065	0.02581	0.00058	0.6586	0.0539	0.0015	163.338	3.7	177.1	5.6	352	61	163.338	3.7	53.5971	7.77061
	QMF1659-54	-	-	-	0.1659	0.0097	0.0256	0.00065	0.434258	0.0467	0.0026	163.483	4.2	154.7	8.5	60	110	163.483	4.2	-172.472	-5.67744
	QMF1659-15	-	-	-	0.191	0.0074	0.02594	0.00055	0.547261	0.0528	0.0017	164.381	3.5	178.4	6.4	330	73	164.381	3.5	50.1877	7.85844
	QMF1659-36	-	-	-	0.1739	0.0052	0.02625	0.00054	0.687956	0.0484	0.0011	167.244	3.4	162.6	4.5	119	48	167.244	3.4	-40.5415	-2.85635
	QMF1659-20	-	-	-	0.1844	0.0063	0.0265	0.00059	0.651668	0.0504	0.0013	168.403	3.7	171.9	5.4	193	57	168.403	3.7	12.7444	2.0341
	QMF1659-48	-	-	-	0.1886	0.006	0.02705	0.00057	0.662366	0.0505	0.0012	171.847	3.6	175.2	5.1	205	54	171.847	3.6	16.1724	1.91401
	QMF1659-22	-	-	-	0.1928	0.0065	0.02716	0.00055	0.600657	0.0508	0.0014	172.475	3.5	178.7	5.6	242	65	172.475	3.5	28.7294	3.48359
	QMF1659-87	-	-	-	0.221	0.023	0.02609	0.001	0.36829	0.0058	-0.02638	175.045	6.4	198	18	380	160	175.045	6.4	53.9355	11.5934
	QMF1659-31	-	-	-	0.1865	0.0067	0.02762	0.00057	0.574454	0.0495	0.0014	175.654	3.6	173.3	5.7	155	62	175.654	3.6	-13.3253	-1.35849
	QMF1659-37	-	-	-	0.1894	0.007	0.02771	0.00061	0.595628	0.0501	0.0015	176.09	3.8	175.9	5.9	187	64	176.09	3.8	5.83426	-0.107975
	QMF1659-89	-	-	-	0.1797	0.01	0.0262	0.00087	0.596714	0.0019	0.14272	176.585	5.4	167.3	8.6	150	78	176.585	5.4	-17.7235	-5.55007
	QMF1659-11	-	-	-	0.2311	0.0071	0.03287	0.00066	0.653561	0.0513	0.0011	208.225	4.1	210.8	5.9	251	47	208.225	4.1	17.0418	1.22151
	QMF1659-63	-	-	-	0.2607	0.0089	0.03377	0.00077	0.667899	0.0557	0.0015	212.699	4.8	235.6	7	431	61	212.699	4.8	50.65	9.72046
	QMF1659-50	-	-	-	0.2836	0.0093	0.03528	0.00075	0.64827	0.0586	0.0015	221.303	4.7	253.5	7.4	522	55	221.303	4.7	57.6048	12.701
	QMF1659-74	-	-	-	0.301	0.031	0.03443	0.0012	0.338415	0.0064	0.02985	230.119	7.4	261	17	570	100	230.119	7.4	59.6283	11.8318
	QMF1659-32	-	-	-	0.281	0.014	0.03663	0.00087	0.476717	0.0564	0.0024	230.307	5.4	249.9	11	440	94	230.307	5.4	47.6576	7.84052
	QMF1659-3	-	-	-	0.2661	0.0072	0.03692	0.00072	0.720748	0.05265	0.00091	233.192	4.5	239.4	5.8	301	39	233.192	4.5	22.5277	2.59329
	QMF1659-108	-	-	-	0.261	0.033	0.03618	0.0012	0.262325	0.0064	-0.095645	241.659	7.6	228	17	130	110	241.659	7.6	-85.8916	-5.99081
	QMF1659-57	-	-	-	0.2671	0.0094	0.03857	0.00085	0.626203	0.0499	0.0015	244.315	5.3	240.5	7.6	190	64	244.315	5.3	-28.5868	-1.58625
	QMF1659-34	-	-	-	0.2765	0.01	0.03884	0.00078	0.555278	0.052	0.0017	245.368	4.8	248.2	8.1	282	69	245.368	4.8	12.99	1.14099
	QMF1659-66	-	-	-	0.2729	0.0099	0.03889	0.00086	0.609577	0.0515	0.0015	245.832	5.3	244.8	7.9	239	65	245.832	5.3	-2.85847	-0.421462
	QMF1659-27	-	-	-	0.2826	0.0083	0.03983	0.00082	0.700967	0.0518	0.0011	251.606	5.1	252.8	6.5	263	47	251.606	5.1	4.33219	0.472172
	QMF1659-45	-	-	-	0.341	0.01	0.04087	0.00094	0.784292	0.0605	0.0012	255.326	5.9	297.6	7.7	619	41	255.326	5.9	58.7519	14.205
	QMF1659-64	-	-	-	0.321	0.013	0.04091	0.00085	0.51304	0.0562	0.0018	256.941	5.3	281.4	9.6	450	70	256.941	5.3	42.902	8.69183
	QMF1659-24	-	-	-	0.3324	0.011	0.04453	0.00091	0.617529	0.0536	0.0014	280.264	5.6	291.2	8.4	330	59	280.264	5.6	15.0716	3.75558
	QMF1659-5	-	-	-	0.317	0.014	0.04576	0.00097	0.479973	0.0505	0.0021	288.993	6	278.6	10	206	87	288.993	6	-40.2877	-3.7303
	QMF1659-58	-	-	-	0.4081	0.012	0.05258	0.0011	0.711471	0.0554	0.0011	329.389	7	347.6	8.5	432	44	329.389	7	23.7525	5.23896
	QMF1659-8	-	-	-	0.3853	0.011	0.05266	0.001	0.665159	0.05368	0.001	330.577	6.2	330.5	7.9	348	42	330.577	6.2	5.0067	-0.0231978
	QMF1659-4	-	-	-	0.4017	0.012	0.05368	0.001	0.623603	0.0554	0.001	336.169	6.2	343.2	8.4	425	41	336.169	6.2	20.9014	2.04869
	QMF1659-35	-	-	-	0.41	0.014	0.05446	0.0012	0.645297	0.0546	0.0013	341.307	7.1	347.8	10	404	53	341.307	7.1	15.5181	1.86695
	QMF1659-38	-	-	-	0.429	0.013	0.05645	0.0011	0.643047	0.0552	0.0011	353.308	6.9	363	8.9	412	44	353.308	6.9	14.2456	2.66993
	QMF1659-56	-	-	-	0.413	0.016	0.05658	0.0013	0.593076	0.0526	0.0018	355.23	8.1	349.9	11	293	73	355.23	8.1	-21.2388	-1.52322
	QMF1659-6	-	-	-	0.445	0.016	0.05719	0.0012	0.583581	0.0567	0.0015	357.207	7.4	372.9	11	470	62	357.207	7.4	23.9986	4.20847
	QMF1659-28	-	-	-	0.4279	0.013	0.05734	0.0012	0.688847	0.0541	0.0011	359.263	7.3	360.9	9.5	365	45	359.263	7.3	1.57168	0.453486
	QMF1659-67	-	-	-	0.447	0.016	0.05755	0.0013	0.631082	0.0562	0.0017	359.636	8.1	374.8	11	440	65	359.636	8.1	18.2646	4.04593
	QMF1659-7	-	-	-	0.4284	0.013	0.05823	0.0011	0.622518	0.0534	0.0012	365.052	6.7	362.4	9.6	346	49	365.052	6.7	-5.50647	-0.73189
	QMF1659-62	-	-	-	0.4562	0.013	0.05982	0.0012	0.703958	0.05494	0.00086	374.142	7.5	381.8	8.8	402	36	374.142	7.5	6.92994	2.00586
	QMF1659-99	-	-	-	0.426	0.023	0.05635	0.0019	0.624513	0.002	0.16686	375.537	11	359.7	16	368	76	375.537	11	-2.04802	-4.40275
	QMF1659-12	-	-	-	0.4649	0.013	0.06112	0.0012	0.702124	0.05524	0.00095	381.985	7.2	387.5	9.1	411	39	381.985	7.2	7.05949	1.4231
	QMF1659-14	-	-	-	0.472	0.016	0.06217	0.0012	0.569406	0.0548	0.0014	388.634	7.5	392.4	11	408	59	388.634	7.5	4.7466	0.959766
	QMF1659-107	-	-	-	0.458	0.023	0.06012	0.002	0.662443	0.0017	-0.067586	400.259	12	381.4	16	372	66	400.259	12	-7.59662	-4.94479
	QMF1659-68	-	-	-	0.5183	0.015	0.06463	0.0013	0.695023	0.058	0.0012	402.156	8.1	424	10	531	45	402.156	8.1	24.2644	5.15193
	QMF1659-55	-	-	-	0.5002	0.014	0.06588	0.0013	0.705026	0.05492	0.00098	411.314	7.9	411.3	9.4	399	40	411.314	7.9	-3.0863	-0.00348674
	QMF1659-2	-	-	-	0.6035	0.016	0.06711	0.0013	0.730657	0.0659	0.0011	413.294	7.8	479.9	11	793	35	413.294	7.8	47.8822	13.8791
	QMF1659-41	-	-	-	0.547	0.017	0.0677	0.0016	0.760448	0.0588	0.0014	420.475	9.4	442.7	11	565	52	420.475	9.4	25.5796	5.02032
	QMF1659-92	-	-	-	0.569	0.029	0.06633	0.0023	0.68035	0.0018	0.32939	440.587	14	455.6	19	656	65	440.587	14	32.8374	3.2953
	QMF1659-26	-	-	-	0.625	0.018	0.07409	0.0016	0.749839	0.0608	0.0012	458.212	9.3	493.2	11	649	43	458.212	9.3	29.3973	7.09412
	QMF1659-23	-	-	-	0.642	0.025	0.0795	0.0018	0.581434	0.0577	0.002	492.749	11	504	16	499	75	492.749	11	1.25265	2.23229
	QMF1659-59	-	-	-	0.651	0.021	0.08001	0.0017	0.658668	0.0583	0.0015	495.483	10	509.5	13	550	55	495.483	10	9.91223	2.75119
	QMF1659-46	-	-	-	0.6507	0.017	0.08249	0.0016	0.742422	0.05707	0.00078	511.234	9.9	510.4	10	495	29	511.234	9.9	-3.27953	-0.163338
	QMF1659-25	-	-	-	0.661	0.02	0.08319	0.0017	0.675382	0.0576	0.0013	515.144	10	515.8	12	500	49	515.144	10	-3.02889	0.127098
	QMF1659-41 2nd	-	-	-	0.667	0.024	0.0857	0.002	0.64858	0.0572	0.0017	530.566	12	520	14	490	64	530.566	12	-8.27875	-2.0319
	QMF1659-9	-	-	-	0.679	0.019	0.08608	0.0017	0.705769	0.05789	0.00097	532.424	9.8	526.1	12	515	38	532.424	9.8	-3.38338	-1.20213
	QMF1659-29	-	-	-	0.835	0.022	0.08818	0.0018	0.774758	0.06842	0.00088	538.274	10	615.8	12	879	28	538.274	10	38.763	12.5895
	QMF1659-69	-	-	-	0.887	0.085	0.098	0.004	0.42593	0.023	-0.037714	628.972	23	626	30	666	76	628.972	23	5.55978	-0.474743
	QMF1659-39	-	-	-	1.209	0.083	0.1325	0.0043	0.472717	0.0685	0.0044	799.667	24	813	37	850	130	799.667	24	5.92159	1.64004
	QMF1659-43	-	-	-	1.269	0.041	0.1363	0.0031	0.703953	0.0673	0.0015	822.992	17	831	18	852	46	822.992	17	3.4047	0.963662
	QMF1659-95	-	-	-	1.531	0.073	0.1575	0.0052	0.692429	0.0015	0.59101	1017.07	29	941.3	29	928	46	928	46	-9.59758	-8.04903
	QMF1659-10	-	-	-	1.507	0.045	0.1563	0.0031	0.664207	0.0704	0.0012	936.04	17	934	18	942	36	936.04	17	0.632656	-0.218457
	QMF1659-60	-	-	-	1.753	0.044	0.1712	0.0035	0.814505	0.07378	0.00084	1018.02	19	1027.2	16	1035	24	1035	24	1.64096	0.894075
	QMF1659-47	-	-	-	1.921	0.053	0.1843	0.0037	0.727659	0.0754	0.0013	1090.95	20	1089	18	1079	33	1079	33	-1.10707	-0.178626
	QMF1659-40	-	-	-	2.174	0.055	0.1999	0.0038	0.751394	0.07928	0.00098	1174.55	20	1173.8	17	1185	25	1185	25	0.881595	-0.0641592
	QMF1659-42	-	-	-	2.315	0.059	0.208	0.004	0.754563	0.08106	0.00095	1217.89	21	1217.3	18	1231	23	1231	23	1.06524	-0.0482117
	QMF1659-70	-	-	-	2.633	0.12	0.2276	0.0072	0.694112	0.0018	0.11999	1444.86	38	1308.4	35	1288	42	1288	42	-12.1785	-10.4294
	QMF1659-110	-	-	-	7.935	0.37	0.4052	0.013	0.688049	0.0027	0.33046	2541.99	59	2222.6	42	2233	33	2233	33	-13.8374	-14.37
	U-Pb LA-ICPMS detrital zircon data
	Sample Location: Maryborough, Queensland (sample name: QMF_MV1; Maryborough, Queensland)
	Formation: Myrtle Creek Sandstone
	Sample #	Th (PPM)	U (PPM)	Th/U	Pb207	±	Pb206	±	Error	Pb207	±	Pb206	± 2σ	Pb207	± 2σ	Pb207	± 2σ	Preferred	± 2σ	Pb-Pb/U-Pb Discordance (%)	U-Pb/U-Pb Discordance (%)
	MV1				/U235	2σ	/U238	2σ	Corr.	/Pb206	2σ	/U238 (Ma)	(Ma)	/U235	(Ma)	/Pb206	(Ma)	Age	(Ma)
	MV1_35	-	-	-	0.207	0.018	0.02886	0.001	0.13206	0.0525	0.0045	183.3	6.3	189	15	210	170	183.3	6.3	12.7143	3.01587
	MV1_11	-	-	-	0.2016	0.01	0.02897	0.00079	0.091286	0.0512	0.0027	184.1	4.9	186.9	9.2	200	110	184.1	4.9	7.95	1.49813
	MV1_71	-	-	-	0.2036	0.011	0.02897	0.00082	0.30777	0.051	0.0025	184.1	5.1	187.2	9	196	100	184.1	5.1	6.07143	1.65598
	MV1_26	-	-	-	0.2	0.012	0.0291	0.0014	-0.12282	0.0506	0.0041	185	8.9	185.3	10	190	170	185	8.9	2.63158	0.1619
	MV1_122	-	-	-	0.211	0.04	0.0293	0.0016	-0.29289	0.054	0.011	186.2	9.8	190	34	190	400	186.2	9.8	2	2
	MV1_63	-	-	-	0.207	0.013	0.02935	0.00087	-0.015754	0.0516	0.0034	186.4	5.4	190	11	200	130	186.4	5.4	6.8	1.89474
	MV1_44	-	-	-	0.207	0.016	0.02946	0.00098	0.15653	0.0513	0.0041	187.1	6.1	189	14	190	150	187.1	6.1	1.52632	1.00529
	MV1_59	-	-	-	0.2043	0.01	0.02946	0.00084	0.046581	0.0506	0.0025	187.2	5.3	188	8.4	180	100	187.2	5.3	-4	0.425532
	MV1_21	-	-	-	0.2026	0.0074	0.02952	0.00079	0.14551	0.05	0.0018	187.5	5	187	6.3	175	78	187.5	5	-7.14286	-0.26738
	MV1_56	-	-	-	0.21	0.014	0.02956	0.0009	0.083041	0.0519	0.0036	187.7	5.6	191	12	200	140	187.7	5.6	6.15	1.72775
	MV1_120	-	-	-	0.207	0.011	0.02957	0.00082	0.04083	0.0514	0.0027	187.8	5.2	189.9	9.2	200	110	187.8	5.2	6.1	1.10585
	MV1_85	-	-	-	0.2062	0.0089	0.02993	0.00082	0.19906	0.0501	0.002	190.1	5.1	189.7	7.5	178	87	190.1	5.1	-6.79775	-0.210859
	MV1_14	-	-	-	0.2076	0.0091	0.02998	0.00078	0.29521	0.0501	0.0019	190.4	4.9	191	7.6	182	83	190.4	4.9	-4.61538	0.314136
	MV1_107	-	-	-	0.211	0.013	0.03	0.00095	0.002075	0.0521	0.0035	190.5	5.9	193	11	190	130	190.5	5.9	-0.263158	1.29534
	MV1_121	-	-	-	0.213	0.019	0.03027	0.0012	-0.1359	0.0516	0.005	192.2	7.2	195	16	200	200	192.2	7.2	3.9	1.4359
	MV1_46	-	-	-	0.213	0.012	0.03071	0.00093	0.061291	0.0504	0.0029	195	5.8	195.6	9.9	190	120	195	5.8	-2.63158	0.306748
	MV1_89	-	-	-	0.2148	0.01	0.03081	0.0008	0.10503	0.0507	0.0023	195.6	5	196.7	8.5	186	95	195.6	5	-5.16129	0.559227
	MV1_17	-	-	-	0.222	0.035	0.0309	0.002	-0.062248	0.0511	0.0082	196	13	200	29	200	340	196	13	2	2
	MV1_75	-	-	-	0.228	0.017	0.0319	0.0012	-0.15509	0.0515	0.0042	202.3	7.6	207	15	220	180	202.3	7.6	8.04545	2.27053
	MV1_91	-	-	-	0.267	0.04	0.0358	0.0019	-0.094205	0.0557	0.0091	227	12	235	32	220	310	227	12	-3.18182	3.40426
	MV1_49	-	-	-	0.261	0.021	0.036	0.0014	0.38561	0.0516	0.0037	228	8.7	234	17	250	160	228	8.7	8.8	2.5641
	MV1_90	-	-	-	0.259	0.013	0.03667	0.0011	0.04196	0.0511	0.0025	232.1	6.6	232.6	10	216	100	232.1	6.6	-7.4537	0.214961
	MV1_37	-	-	-	0.269	0.023	0.0369	0.0014	0.17846	0.0519	0.0042	233.3	8.4	239	18	230	170	233.3	8.4	-1.43478	2.38494
	MV1_47	-	-	-	0.267	0.015	0.03768	0.0011	0.04029	0.052	0.0029	238.4	7.1	241	11	240	110	238.4	7.1	0.666667	1.07884
	MV1_119	-	-	-	0.315	0.074	0.0388	0.0014	0.68601	0.054	0.0097	245.4	8.6	260	43	260	280	245.4	8.6	5.61538	5.61538
	MV1_19	-	-	-	0.292	0.022	0.0405	0.0014	-0.078862	0.0531	0.0043	255.6	8.5	258	17	250	160	255.6	8.5	-2.24	0.930233
	MV1_112	-	-	-	0.293	0.013	0.04083	0.0011	0.17421	0.0524	0.0022	257.9	6.6	259.9	9.7	258	86	257.9	6.6	0.0387597	0.769527
	MV1_51	-	-	-	0.311	0.025	0.0422	0.0016	-0.042487	0.0543	0.0044	266.2	9.9	272	19	290	170	266.2	9.9	8.2069	2.13235
	MV1_104	-	-	-	0.314	0.035	0.0436	0.0024	-0.30289	0.0535	0.0072	275	15	275	28	260	280	275	15	-5.76923	0
	MV1_78	-	-	-	0.349	0.014	0.04787	0.0012	0.28949	0.0529	0.0018	301.4	7.5	302.9	10	293	75	301.4	7.5	-2.86689	0.495213
	MV1_30	-	-	-	0.3688	0.012	0.0507	0.0012	0.29316	0.0529	0.0014	318.8	7.6	318.2	8.7	305	62	318.8	7.6	-4.52459	-0.188561
	MV1_100	-	-	-	0.439	0.043	0.0581	0.0023	0.21585	0.0546	0.005	364	14	368	30	360	200	364	14	-1.11111	1.08696
	MV1_86	-	-	-	0.48	0.019	0.0629	0.0016	0.16585	0.0556	0.0021	393	9.9	396	13	397	81	393	9.9	1.00756	0.757576
	MV1_123	-	-	-	0.617	0.023	0.0787	0.002	0.1598	0.0571	0.002	488.1	12	487	15	456	77	488.1	12	-7.03947	-0.225873
	MV1_88	-	-	-	0.665	0.024	0.0819	0.002	0.35709	0.0588	0.0018	507.6	12	516	15	527	70	507.6	12	3.68121	1.62791
	MV1_8	-	-	-	0.674	0.032	0.0834	0.0028	0.53308	0.0587	0.0022	516	17	521	19	527	84	516	17	2.08729	0.959693
	MV1_68	-	-	-	0.703	0.069	0.0841	0.0035	0.0029029	0.0583	0.0047	520	21	537	40	570	220	520	21	8.77193	3.16574
	MV1_29	-	-	-	0.672	0.025	0.0843	0.0022	0.23261	0.058	0.002	521.7	13	520	15	496	75	521.7	13	-5.18145	-0.326923
	MV1_32	-	-	-	0.678	0.024	0.0848	0.0022	0.28349	0.0584	0.0018	524.4	13	525	14	523	65	524.4	13	-0.267686	0.114286
	MV1_4	-	-	-	0.715	0.062	0.0849	0.0032	0.11832	0.0607	0.0052	525	19	534	37	490	180	525	19	-7.14286	1.68539
	MV1_83	-	-	-	0.678	0.024	0.0849	0.0022	0.31086	0.0582	0.0018	525.3	13	524	14	507	69	525.3	13	-3.60947	-0.248092
	MV1_45	-	-	-	0.685	0.024	0.0854	0.0023	0.14669	0.0585	0.0021	528.4	13	528	15	517	75	528.4	13	-2.20503	-0.0757576
	MV1_13	-	-	-	0.678	0.022	0.0856	0.0022	0.33626	0.0574	0.0016	529.5	13	524.2	13	492	61	529.5	13	-7.62195	-1.01106
	MV1_114	-	-	-	0.704	0.025	0.0876	0.0022	0.09978	0.0583	0.002	541.1	13	541	14	513	72	541.1	13	-5.47758	-0.0184843
	MV1_117	-	-	-	0.718	0.023	0.0882	0.0022	0.43579	0.0589	0.0016	544.5	13	548.2	14	545	60	544.5	13	0.0917431	0.674936
	MV1_70	-	-	-	0.716	0.026	0.0895	0.0024	0.21782	0.0582	0.002	552.1	14	546	16	503	76	552.1	14	-9.76143	-1.11722
	MV1_3	-	-	-	0.738	0.029	0.0897	0.0023	0.15142	0.0598	0.0022	553.8	14	560	17	573	80	553.8	14	3.35079	1.10714
	MV1_81	-	-	-	0.741	0.034	0.09	0.0025	0.35906	0.0595	0.0025	555	15	560	20	546	93	555	15	-1.64835	0.892857
	MV1_2	-	-	-	0.759	0.041	0.0908	0.0027	0.036823	0.0609	0.0033	560	16	570	24	580	120	560	16	3.44828	1.75439
	MV1_125	-	-	-	0.756	0.025	0.0908	0.0022	0.27981	0.0599	0.0018	560	13	571	15	586	65	560	13	4.43686	1.92644
	MV1_77	-	-	-	0.752	0.031	0.0915	0.0024	0.27104	0.0597	0.0023	564.2	14	567	18	554	84	564.2	14	-1.84116	0.493827
	MV1_12	-	-	-	0.746	0.033	0.0917	0.0024	0.14532	0.0592	0.0025	565.5	14	564	20	530	92	565.5	14	-6.69811	-0.265957
	MV1_62	-	-	-	0.743	0.021	0.0919	0.0022	0.47229	0.0588	0.0014	566.7	13	563.6	13	546	51	566.7	13	-3.79121	-0.550035
	MV1_96	-	-	-	0.765	0.035	0.092	0.0025	0.22536	0.06	0.0025	567.1	15	575	20	573	92	567.1	15	1.02967	1.37391
	MV1_5	-	-	-	0.76	0.024	0.0922	0.0023	0.30633	0.0601	0.0016	568.2	13	573.9	14	583	60	568.2	13	2.53859	0.993204
	MV1_7	-	-	-	0.761	0.022	0.0925	0.0022	0.38779	0.05977	0.0014	570.1	13	573.5	12	587	49	570.1	13	2.87905	0.592851
	MV1_27	-	-	-	0.766	0.026	0.093	0.0022	0.4044	0.0598	0.0017	573.1	13	575	15	569	63	573.1	13	-0.720562	0.330435
	MV1_127	-	-	-	0.78	0.043	0.0931	0.0029	0.16433	0.0604	0.0033	574	17	586	25	580	120	574	17	1.03448	2.04778
	MV1_10	-	-	-	0.756	0.034	0.0935	0.0029	0.10194	0.0591	0.0028	576	17	570	20	534	100	576	17	-7.86517	-1.05263
	MV1_79	-	-	-	0.762	0.029	0.094	0.0026	0.23272	0.0586	0.002	579	15	573	17	542	79	579	15	-6.82657	-1.04712
	MV1_24	-	-	-	0.772	0.022	0.0946	0.0023	0.44496	0.05913	0.0014	582.7	13	580.2	13	565	51	582.7	13	-3.13274	-0.430886
	MV1_115	-	-	-	0.782	0.021	0.0948	0.0023	0.46496	0.05987	0.0013	583.5	13	587.1	12	588	48	583.5	13	0.765306	0.613183
	MV1_72	-	-	-	0.782	0.023	0.0949	0.0023	0.31612	0.0598	0.0015	584	14	586.7	13	582	57	584	14	-0.343643	0.460201
	MV1_118	-	-	-	0.797	0.034	0.0955	0.0025	0.23329	0.0605	0.0023	587.9	15	591	19	568	84	587.9	15	-3.50352	0.524535
	MV1_93	-	-	-	0.816	0.03	0.0959	0.003	0.76422	0.061	0.0019	590	17	604	17	620	68	590	17	4.83871	2.31788
	MV1_52	-	-	-	0.794	0.029	0.096	0.0024	0.28588	0.0597	0.0019	590.7	14	591	16	566	69	590.7	14	-4.36396	0.0507614
	MV1_105	-	-	-	0.805	0.038	0.0966	0.0026	0.20772	0.0601	0.0026	594.1	15	596	22	565	97	594.1	15	-5.15044	0.318792
	MV1_116	-	-	-	0.818	0.031	0.0975	0.0027	0.45918	0.0608	0.0019	600	16	606	17	610	67	600	16	1.63934	0.990099
	MV1_42	-	-	-	0.82	0.025	0.098	0.0024	0.42253	0.0609	0.0015	602.5	14	607.9	14	625	53	602.5	14	3.6	0.888304
	MV1_22	-	-	-	0.818	0.024	0.099	0.0023	0.31205	0.0599	0.0015	608.7	13	606	14	588	56	608.7	13	-3.52041	-0.445545
	MV1_110	-	-	-	0.93	0.044	0.1006	0.003	0.27574	0.0677	0.0031	617	17	670	25	824	98	617	17	25.1214	7.91045
	MV1_40	-	-	-	0.837	0.03	0.1009	0.0025	0.24304	0.0601	0.002	619.5	15	616	16	583	71	619.5	15	-6.26072	-0.568182
	MV1_92	-	-	-	0.843	0.025	0.1009	0.0025	0.45695	0.0605	0.0015	619.5	14	619.6	14	608	53	619.5	14	-1.89145	0.0161394
	MV1_1	-	-	-	0.853	0.024	0.1014	0.0025	0.56083	0.06078	0.0013	622.5	15	625.4	13	629	48	622.5	15	1.03339	0.463703
	MV1_73	-	-	-	0.912	0.035	0.1051	0.0029	0.64431	0.0628	0.0018	644	17	655	19	690	63	644	17	6.66667	1.67939
	MV1_113	-	-	-	0.885	0.029	0.1053	0.0026	0.3794	0.0609	0.0017	645.3	15	642	15	611	60	645.3	15	-5.61375	-0.514019
	MV1_6	-	-	-	0.976	0.053	0.1125	0.0039	0.030766	0.0631	0.0036	687	22	690	27	690	130	687	22	0.434783	0.434783
	MV1_48	-	-	-	1.06	0.063	0.1161	0.0036	0.20152	0.0662	0.0038	708	21	726	30	740	120	708	21	4.32432	2.47934
	MV1_61	-	-	-	1.212	0.037	0.1328	0.0034	0.67782	0.06612	0.0015	804	19	804	17	799	49	804	19	-0.625782	0
	MV1_98	-	-	-	1.395	0.042	0.1444	0.0036	0.57854	0.0697	0.0017	869	20	885	18	913	49	869	20	4.81928	1.80791
	MV1_109	-	-	-	1.498	0.046	0.1497	0.0041	0.55268	0.072	0.0018	899	23	928	19	983	53	899	23	8.54527	3.125
	MV1_65	-	-	-	1.474	0.049	0.1529	0.0039	0.16887	0.0699	0.0021	917	22	916	20	910	64	917	22	-0.769231	-0.10917
	MV1_39	-	-	-	1.693	0.049	0.1701	0.0042	0.48415	0.0723	0.0017	1012	23	1004	18	982	47	982	47	-3.05499	-0.796813
	MV1_60	-	-	-	1.785	0.049	0.1765	0.0043	0.49649	0.0732	0.0016	1047	23	1038.6	18	1015	44	1015	44	-3.15271	-0.808781
	MV1_94	-	-	-	1.772	0.055	0.1738	0.0044	0.5014	0.0738	0.0019	1032	24	1033	20	1031	48	1031	48	-0.0969932	0.0968054
	MV1_16	-	-	-	1.738	0.052	0.1695	0.0045	0.69947	0.07423	0.0016	1009	25	1021	19	1046	45	1046	45	3.53728	1.17532
	MV1_126	-	-	-	1.801	0.08	0.172	0.0052	0.34	0.0758	0.003	1022	29	1042	29	1062	83	1062	83	3.76648	1.91939
	MV1_87	-	-	-	1.953	0.055	0.1883	0.0046	0.46862	0.075	0.0017	1112	25	1098	19	1063	46	1063	46	-4.6096	-1.27505
	MV1_36	-	-	-	1.719	0.048	0.1652	0.004	0.49625	0.0752	0.0016	985	22	1015.4	17	1064	43	1064	43	7.42481	2.99389
	MV1_80	-	-	-	1.859	0.056	0.178	0.0042	0.32525	0.0757	0.002	1056	23	1066	19	1081	52	1081	52	2.31267	0.938086
	MV1_82	-	-	-	1.843	0.055	0.1734	0.0044	0.52536	0.0768	0.0018	1031	24	1058	20	1109	48	1109	48	7.03336	2.55198
	MV1_53	-	-	-	2.189	0.069	0.2057	0.0052	0.41248	0.0774	0.0021	1205	28	1174	22	1116	55	1116	55	-7.97491	-2.64055
	MV1_23	-	-	-	2.082	0.076	0.1927	0.0049	0.24169	0.0785	0.0026	1135	26	1137	25	1123	67	1123	67	-1.06857	0.175901
	MV1_9	-	-	-	1.875	0.063	0.1751	0.0045	0.78979	0.0776	0.0021	1040	25	1070	22	1125	53	1125	53	7.55556	2.80374
	MV1_54	-	-	-	3.929	0.11	0.292	0.007	0.50632	0.0977	0.0021	1650	35	1618	22	1576	39	1576	39	-4.69543	-1.97775
	MV1_101	-	-	-	3.944	0.11	0.2876	0.0073	0.71533	0.0995	0.002	1628	37	1620	23	1608	39	1608	39	-1.24378	-0.493827
	MV1_43	-	-	-	3.906	0.11	0.2792	0.0069	0.49733	0.1016	0.0023	1586	35	1612	23	1645	41	1645	41	3.58663	1.6129
	MV1_55	-	-	-	5.73	0.17	0.3374	0.0087	0.54653	0.1227	0.0029	1880	45	1931	26	1985	43	1985	43	5.28967	2.64112
	MV1_28	-	-	-	7.33	0.23	0.376	0.01	0.75136	0.1415	0.0032	2056	49	2149	28	2240	38	2240	38	8.21429	4.32759
	MV1_111	-	-	-	9.52	0.3	0.424	0.014	0.69849	0.1624	0.0041	2278	63	2388	29	2477	43	2477	43	8.03391	4.60637
	U-Pb LA-ICPMS detrital zircon data
	Sample Location: Maryborough, Queensland (sample name: QMF_MV2; Maryborough, Queensland)
	Formation: Myrtle Creek Sandstone
	Sample #	Th (PPM)	U (PPM)	Th/U	Pb207	±	Pb206	±	Error	Pb207	±	Pb206	± 2σ	Pb207	± 2σ	Pb207	± 2σ	Preferred	± 2σ	Pb-Pb/U-Pb Discordance (%)	U-Pb/U-Pb Discordance (%)
	MV2				/U235	2σ	/U238	2σ	Corr.	/Pb206	2σ	/U238 (Ma)	(Ma)	/U235	(Ma)	/Pb206	(Ma)	Age	(Ma)
	MV2_92	-	-	-	0.1699	0.0059	0.025	0.00044	0.08061	0.0499	0.002	159.1	2.8	159	5.1	158	84	159.1	2.8	0.696203	-0.0628931
	MV2_7	-	-	-	0.2111	0.0096	0.03041	0.00057	0.060754	0.0507	0.0025	193.1	3.6	193.6	8	180	100	193.1	3.6	7.27778	0.258264
	MV2_58	-	-	-	0.218	0.021	0.0305	0.0012	-0.078576	0.0535	0.0059	193.4	7.5	197	18	190	210	193.4	7.5	1.78947	1.82741
	MV2_84	-	-	-	0.213	0.011	0.03046	0.00064	0.091096	0.0506	0.0026	193.4	4	194.8	9.2	180	110	193.4	4	7.44444	0.718686
	MV2_5	-	-	-	0.2113	0.009	0.03047	0.00055	0.05471	0.0504	0.0024	193.5	3.5	194.1	7.6	185	100	193.5	3.5	4.59459	0.309119
	MV2_46	-	-	-	0.2138	0.007	0.03078	0.00053	0.23212	0.0504	0.0018	195.4	3.3	197.2	6.1	203	78	195.4	3.3	-3.74384	0.912779
	MV2_76	-	-	-	0.243	0.01	0.03475	0.00071	0.3254	0.0512	0.0022	220.1	4.4	219.9	8.3	208	89	220.1	4.4	5.81731	-0.0909504
	MV2_83	-	-	-	0.2648	0.0095	0.03726	0.0006	0.33277	0.0514	0.0018	235.8	3.7	237.7	7.6	239	77	235.8	3.7	-1.33891	0.799327
	MV2_56	-	-	-	0.289	0.029	0.0385	0.0013	0.15794	0.0548	0.0057	243.6	8.2	253	23	240	200	243.6	8.2	1.5	3.71542
	MV2_21	-	-	-	0.284	0.031	0.0393	0.0018	0.20108	0.051	0.0052	248	11	252	24	240	230	248	11	3.33333	1.5873
	MV2_65	-	-	-	0.294	0.029	0.0394	0.0013	0.05523	0.0553	0.0058	248.8	8.3	256	23	240	200	248.8	8.3	3.66667	2.8125
	MV2_94	-	-	-	0.289	0.018	0.03948	0.00092	0.10661	0.0535	0.0035	249.6	5.7	254	14	240	140	249.6	5.7	4	1.73228
	MV2_32	-	-	-	0.2867	0.0092	0.04043	0.00063	0.27913	0.0511	0.0017	255.4	3.9	256	7.4	233	74	255.4	3.9	9.61373	0.234375
	MV2_23	-	-	-	0.303	0.023	0.0417	0.0012	-0.0037373	0.0534	0.0046	263.5	7.2	267	18	260	170	263.5	7.2	1.34615	1.31086
	MV2_43	-	-	-	0.311	0.031	0.0428	0.0017	0.16651	0.0544	0.0056	270	10	275	25	270	210	270	10	0	1.81818
	MV2_8	-	-	-	0.315	0.021	0.0432	0.0012	0.075621	0.0526	0.0037	272.4	7.4	276	16	260	140	272.4	7.4	4.76923	1.30435
	MV2_124	-	-	-	0.324	0.017	0.0451	0.0012	0.21354	0.0525	0.003	284.4	7.4	284	13	260	120	284.4	7.4	9.38462	-0.140845
	MV2_62	-	-	-	0.327	0.019	0.0453	0.0019	0.13346	0.0529	0.0035	285	12	286	15	290	140	285	12	-1.72414	0.34965
	MV2_111	-	-	-	0.334	0.013	0.04586	0.00098	0.32385	0.0525	0.0019	289	6.1	291.3	9.5	280	82	289	6.1	3.21429	0.789564
	MV2_113	-	-	-	0.341	0.018	0.0465	0.00089	0.15515	0.0529	0.0028	292.9	5.5	296	13	290	110	292.9	5.5	1	1.0473
	MV2_60	-	-	-	0.3479	0.01	0.04768	0.00082	0.23964	0.0531	0.0017	300.2	5	303.3	8	307	72	300.2	5	-2.21498	1.02209
	MV2_22	-	-	-	0.352	0.012	0.0479	0.00079	0.24097	0.0533	0.002	301.6	4.8	306.4	9.6	310	80	301.6	4.8	-2.70968	1.56658
	MV2_119	-	-	-	0.351	0.015	0.04792	0.0009	0.12598	0.0529	0.0025	301.7	5.5	303	12	283	100	301.7	5.5	6.60777	0.429043
	MV2_19	-	-	-	0.3611	0.01	0.04939	0.00069	0.28151	0.0531	0.0016	310.7	4.2	312.2	7.6	307	67	310.7	4.2	1.20521	0.480461
	MV2_106	-	-	-	0.373	0.015	0.05046	0.00092	0.1777	0.0539	0.0023	317.3	5.7	321	11	321	91	317.3	5.7	-1.15265	1.15265
	MV2_35	-	-	-	0.484	0.019	0.0633	0.0012	0.06313	0.0561	0.0025	395.7	7.1	400	13	394	95	395.7	7.1	0.431472	1.075
	MV2_98	-	-	-	0.474	0.017	0.0634	0.0014	0.16431	0.0548	0.0023	396.5	8.6	393	12	378	93	396.5	8.6	4.89418	-0.890585
	MV2_14	-	-	-	0.513	0.026	0.0664	0.0015	0.19946	0.0563	0.003	414.4	9	418	17	400	120	414.4	9	3.6	0.861244
	MV2_68	-	-	-	0.512	0.024	0.0665	0.0014	0.28001	0.0558	0.0026	414.8	8.5	417	16	390	98	414.8	8.5	6.35897	0.527578
	MV2_82	-	-	-	0.511	0.017	0.06696	0.00095	0.21518	0.0557	0.002	417.7	5.7	417	11	398	77	417.7	5.7	4.94975	-0.167866
	MV2_16	-	-	-	0.51	0.012	0.0674	0.001	0.26529	0.0549	0.0015	420.4	6.1	417.4	8.3	385	61	420.4	6.1	9.19481	-0.718735
	MV2_39	-	-	-	0.586	0.023	0.075	0.0015	0.34092	0.0567	0.0022	466.1	8.9	466	14	438	84	466.1	8.9	6.41553	-0.0214592
	MV2_44	-	-	-	0.639	0.025	0.0794	0.0016	0.27493	0.0586	0.0024	492.5	9.7	499	15	498	87	492.5	9.7	-1.10442	1.30261
	MV2_112	-	-	-	0.652	0.018	0.0812	0.0012	0.25696	0.0581	0.0018	503.3	7.1	508	11	508	67	503.3	7.1	-0.925197	0.925197
	MV2_85	-	-	-	0.652	0.019	0.0821	0.0014	0.37447	0.0577	0.0017	508.6	8.2	508	12	485	67	508.6	8.2	4.86598	-0.11811
	MV2_88	-	-	-	0.654	0.012	0.0825	0.001	0.44152	0.05745	0.0012	511.2	6.1	510.3	7.6	494	46	511.2	6.1	3.48178	-0.176367
	MV2_78	-	-	-	0.665	0.026	0.0837	0.0016	0.02375	0.0578	0.0026	518	9.6	516	16	481	97	518	9.6	7.69231	-0.387597
	MV2_45	-	-	-	0.693	0.028	0.0847	0.0014	0.27441	0.0593	0.0024	524.2	8	530	17	531	86	524.2	8	-1.2806	1.09434
	MV2_90	-	-	-	0.708	0.015	0.0878	0.0011	0.35897	0.0583	0.0013	542.3	6.7	542.6	9	525	51	542.3	6.7	3.29524	0.0552893
	MV2_127	-	-	-	0.7455	0.0096	0.08853	0.00091	0.58644	0.06107	0.00099	546.8	5.4	565.3	5.6	637	35	546.8	5.4	-14.1601	3.2726
	MV2_114	-	-	-	0.727	0.03	0.089	0.0018	0.31725	0.0596	0.0025	549	11	553	18	527	91	549	11	4.17457	0.723327
	MV2_97	-	-	-	0.739	0.017	0.0901	0.0013	0.19721	0.0596	0.0016	556.3	7.9	560.7	10	566	60	556.3	7.9	-1.71378	0.784733
	MV2_36	-	-	-	0.752	0.021	0.0911	0.0012	0.10357	0.0599	0.0019	561.7	7	568	12	570	70	561.7	7	-1.45614	1.10915
	MV2_77	-	-	-	0.748	0.015	0.0917	0.0012	0.27301	0.059	0.0013	565.7	7.1	567.4	8.6	563	48	565.7	7.1	0.479574	0.299612
	MV2_51	-	-	-	0.766	0.02	0.0919	0.0015	0.25942	0.0604	0.0017	566.4	9.1	576	11	596	63	566.4	9.1	-4.96644	1.66667
	MV2_74	-	-	-	0.76	0.027	0.0926	0.0017	0.13381	0.059	0.0022	570.5	9.7	572	15	552	86	570.5	9.7	3.35145	0.262238
	MV2_17	-	-	-	0.785	0.028	0.0939	0.0017	0.15474	0.0601	0.0021	579	10	587	16	621	75	579	10	-6.76329	1.36286
	MV2_63	-	-	-	0.798	0.024	0.0947	0.0019	0.44829	0.0611	0.0019	583	11	595	14	627	65	583	11	-7.01754	2.01681
	MV2_75	-	-	-	0.781	0.04	0.0949	0.0023	-0.093773	0.0602	0.0035	584	13	582	23	540	130	584	13	8.14815	-0.343643
	MV2_54	-	-	-	0.805	0.019	0.0967	0.0014	0.34384	0.0602	0.0015	595	8	598	11	597	58	595	8	-0.335008	0.501672
	MV2_117	-	-	-	0.802	0.02	0.0976	0.0022	0.61636	0.0597	0.0014	600	13	597	11	591	49	600	13	1.52284	-0.502513
	MV2_129	-	-	-	0.828	0.044	0.0982	0.0027	0.093501	0.0621	0.0036	603	16	606	24	580	120	603	16	3.96552	0.49505
	MV2_79	-	-	-	0.846	0.041	0.1005	0.0022	0.14829	0.0613	0.0031	617	13	618	23	590	110	617	13	4.57627	0.161812
	MV2_80	-	-	-	0.865	0.037	0.1035	0.0026	0.34206	0.0607	0.0026	635	15	630	20	595	94	635	15	6.72269	-0.793651
	MV2_1	-	-	-	0.946	0.029	0.1109	0.0018	0.21192	0.0621	0.0021	678	11	676	14	648	71	678	11	4.62963	-0.295858
	MV2_31	-	-	-	1.164	0.045	0.1254	0.0036	0.70534	0.0672	0.002	761	21	781	21	831	63	761	21	-8.42359	2.56082
	MV2_69	-	-	-	1.391	0.06	0.1489	0.0031	0.13009	0.0678	0.0031	894	17	879	25	809	100	894	17	10.5068	-1.70648
	MV2_87	-	-	-	1.629	0.04	0.1628	0.0024	0.35221	0.0724	0.0018	972	13	978	15	980	54	972	13	-0.816327	0.613497
	MV2_12	-	-	-	1.569	0.037	0.1572	0.0025	0.50118	0.0729	0.0017	941	14	956	15	1000	48	1000	48	-5.9	1.56904
	MV2_34	-	-	-	1.817	0.055	0.1763	0.0036	0.27495	0.0751	0.0025	1046	20	1048	20	1046	68	1046	68	0	0.19084
	MV2_115	-	-	-	1.855	0.036	0.18	0.0027	0.32388	0.0749	0.0018	1066	15	1063	13	1055	49	1055	49	1.04265	-0.28222
	MV2_116	-	-	-	2.111	0.081	0.2004	0.0038	0.42348	0.0764	0.0028	1177	20	1142	26	1066	72	1066	72	10.4128	-3.0648
	MV2_121	-	-	-	1.886	0.056	0.181	0.0035	0.39298	0.0759	0.0023	1071	19	1074	19	1076	62	1076	62	-0.464684	0.27933
	MV2_13	-	-	-	2.2	0.27	0.199	0.011	-0.041512	0.082	0.011	1169	61	1156	85	1080	290	1080	290	8.24074	-1.12457
	MV2_41	-	-	-	2.071	0.076	0.1941	0.004	0.20699	0.0777	0.0031	1142	22	1133	25	1093	81	1093	81	4.48307	-0.794351
	MV2_89	-	-	-	2.013	0.04	0.1908	0.0028	0.41398	0.0765	0.0017	1125	15	1117	14	1093	45	1093	45	2.92772	-0.716204
	MV2_126	-	-	-	2.003	0.066	0.1889	0.004	0.3873	0.0772	0.0026	1114	22	1112	23	1093	71	1093	71	1.92132	-0.179856
	MV2_30	-	-	-	1.926	0.028	0.1831	0.0021	0.50032	0.0762	0.0014	1083	11	1089	9.7	1094	36	1094	36	-1.00548	0.550964
	MV2_20	-	-	-	1.862	0.035	0.176	0.0022	0.50503	0.076	0.0015	1045	12	1066	12	1098	41	1098	41	-4.82696	1.96998
	MV2_61	-	-	-	2.079	0.067	0.1955	0.0034	0.078081	0.0774	0.0029	1150	18	1136	22	1105	73	1105	73	4.0724	-1.23239
	MV2_125	-	-	-	2.174	0.075	0.2017	0.0037	0.27755	0.0785	0.0028	1184	20	1164	24	1109	74	1109	74	6.76285	-1.71821
	MV2_29	-	-	-	2.051	0.058	0.1918	0.003	0.21163	0.0777	0.0024	1130	16	1127	19	1113	61	1113	61	1.5274	-0.266193
	MV2_110	-	-	-	2.099	0.07	0.1959	0.004	0.40697	0.0779	0.0026	1152	21	1143	23	1115	68	1115	68	3.31839	-0.787402
	MV2_3	-	-	-	2.017	0.051	0.1882	0.0026	0.40307	0.0776	0.002	1111	14	1119	17	1119	53	1119	53	-0.714924	0.714924
	MV2_26	-	-	-	1.794	0.042	0.168	0.0034	0.48553	0.0774	0.0019	1001	19	1042	15	1122	50	1122	50	-10.7843	3.93474
	MV2_38	-	-	-	2.111	0.09	0.1919	0.0043	0.087424	0.0802	0.0038	1130	23	1139	30	1122	100	1122	100	0.713012	0.790167
	MV2_96	-	-	-	2.041	0.049	0.1903	0.0029	0.27238	0.0782	0.0022	1122	16	1128	17	1128	55	1128	55	-0.531915	0.531915
	MV2_27	-	-	-	2.058	0.055	0.1906	0.0029	0.3233	0.0784	0.0023	1124	16	1132	19	1129	59	1129	59	-0.44287	0.706714
	MV2_48	-	-	-	2.09	0.12	0.1939	0.0062	0.15036	0.0786	0.0048	1141	33	1144	37	1130	120	1130	120	0.973451	0.262238
	MV2_33	-	-	-	2.052	0.042	0.1912	0.0024	0.3664	0.0777	0.0018	1128	13	1130	14	1131	44	1131	44	-0.265252	0.176991
	MV2_55	-	-	-	2.056	0.057	0.1905	0.0034	0.20847	0.0786	0.0025	1123	18	1132	18	1135	62	1135	62	-1.05727	0.795053
	MV2_28	-	-	-	2.027	0.04	0.1881	0.0027	0.28462	0.0782	0.0019	1111	15	1122	14	1136	47	1136	47	-2.2007	0.980392
	MV2_49	-	-	-	2.16	0.14	0.1922	0.0064	0.016863	0.0818	0.0057	1131	35	1148	46	1170	150	1170	150	-3.33333	1.48084
	MV2_95	-	-	-	2.169	0.048	0.1985	0.003	0.3116	0.0796	0.002	1167	16	1169	15	1174	51	1174	51	-0.596252	0.171086
	MV2_93	-	-	-	2.255	0.054	0.2038	0.0034	0.21899	0.0803	0.0023	1195	18	1195	17	1182	57	1182	57	1.09983	0
	MV2_107	-	-	-	1.963	0.061	0.1763	0.0035	0.29563	0.0806	0.0028	1047	19	1104	19	1206	63	1206	63	-13.1841	5.16304
	MV2_99	-	-	-	2.177	0.042	0.1951	0.0027	0.42722	0.081	0.0017	1148	15	1172	13	1209	43	1209	43	-5.04549	2.04778
	MV2_66	-	-	-	2.874	0.082	0.2338	0.0046	0.74587	0.0889	0.002	1353	24	1371	21	1392	43	1392	43	-2.80172	1.31291
	MV2_109	-	-	-	3.192	0.063	0.254	0.0041	0.2852	0.0917	0.0023	1458	21	1455	16	1447	47	1447	47	0.760194	-0.206186
	MV2_86	-	-	-	3.228	0.055	0.2534	0.0034	0.55398	0.0922	0.0017	1455	17	1462	13	1471	36	1455	17	-1.0877	0.478796
	MV2_102	-	-	-	3.316	0.082	0.257	0.004	0.34482	0.0937	0.0025	1474	20	1481	19	1486	50	1486	50	-0.807537	0.472654
	MV2_15	-	-	-	3.25	0.11	0.2501	0.0052	0.56265	0.0942	0.0028	1438	27	1469	25	1507	54	1507	54	-4.57863	2.11028
	MV2_81	-	-	-	3.443	0.078	0.2611	0.0045	0.52719	0.0953	0.0025	1495	23	1512	18	1524	52	1524	52	-1.90289	1.12434
	MV2_103	-	-	-	3.525	0.09	0.2637	0.0058	0.099929	0.0963	0.0029	1508	29	1531	20	1544	58	1544	58	-2.33161	1.50229
	MV2_10	-	-	-	3.54	0.15	0.2646	0.0065	0.52181	0.098	0.0041	1511	33	1523	34	1559	77	1559	77	-3.0789	0.787919
	MV2_122	-	-	-	3.641	0.058	0.2718	0.0037	0.67767	0.097	0.0017	1549	19	1557	13	1563	32	1563	32	-0.895713	0.513809
	MV2_72	-	-	-	3.694	0.064	0.2749	0.0039	0.41753	0.0973	0.002	1565	19	1568	14	1568	39	1568	39	-0.191327	0.191327
	MV2_59	-	-	-	3.694	0.053	0.2756	0.0037	0.68222	0.0974	0.0016	1568	19	1568.6	12	1569	32	1569	32	-0.0637349	0.0382507
	MV2_24	-	-	-	3.681	0.058	0.2719	0.0032	0.42542	0.0981	0.0019	1550	16	1565	13	1584	36	1584	36	-2.14646	0.958466
	MV2_6	-	-	-	3.71	0.057	0.2737	0.0029	0.37405	0.0983	0.0019	1559	14	1573	13	1585	36	1585	36	-1.64038	0.890019
	MV2_53	-	-	-	3.772	0.068	0.2771	0.004	0.35674	0.0989	0.0021	1576	20	1584	15	1595	40	1595	40	-1.19122	0.505051
	MV2_47	-	-	-	3.893	0.084	0.2825	0.004	0.37368	0.0996	0.0023	1603	20	1608	17	1603	43	1603	43	0	0.310945
	MV2_9	-	-	-	3.921	0.073	0.2851	0.0035	0.50746	0.0993	0.002	1616	17	1615	15	1606	38	1606	38	0.622665	-0.0619195
	MV2_130	-	-	-	3.962	0.093	0.289	0.0055	0.56996	0.0996	0.0024	1635	28	1623	19	1606	44	1606	44	1.80573	-0.739372
	MV2_105	-	-	-	3.931	0.091	0.2828	0.0047	0.33354	0.1011	0.0026	1604	24	1616	19	1628	49	1628	49	-1.4742	0.742574
	MV2_118	-	-	-	3.96	0.11	0.2833	0.0059	0.5441	0.1008	0.0026	1607	30	1621	23	1636	51	1636	51	-1.77262	0.863664
	MV2_128	-	-	-	4.375	0.083	0.303	0.005	0.44257	0.1051	0.0023	1704	25	1704	16	1708	42	1708	42	-0.234192	0
	MV2_123	-	-	-	3.875	0.099	0.2657	0.0052	0.59954	0.1054	0.0027	1524	29	1606	21	1714	48	1714	48	-11.0852	5.10585
	MV2_101	-	-	-	4.203	0.084	0.2866	0.0038	0.47255	0.1061	0.0023	1624	19	1671	16	1723	40	1723	40	-5.74579	2.81269
	MV2_71	-	-	-	4.622	0.079	0.3155	0.0044	0.53784	0.106	0.002	1766	22	1751	14	1725	35	1725	35	2.37681	-0.856653
	MV2_4	-	-	-	4.389	0.061	0.2999	0.0038	0.54327	0.106	0.0019	1690	19	1709.1	12	1727	33	1727	33	-2.14244	1.11755
	MV2_70	-	-	-	4.43	0.095	0.3019	0.0055	0.20538	0.1066	0.0029	1700	27	1716	18	1730	51	1730	51	-1.7341	0.932401
	MV2_52	-	-	-	4.53	0.075	0.3087	0.0045	0.486	0.1068	0.0022	1733	22	1736	14	1735	38	1735	38	-0.115274	0.172811
	MV2_18	-	-	-	4.501	0.063	0.3056	0.0036	0.64094	0.1066	0.0018	1718	18	1729.8	12	1738	31	1738	31	-1.15075	0.68216
	MV2_67	-	-	-	4.73	0.079	0.322	0.0044	0.67153	0.1067	0.0019	1798	22	1772	14	1738	33	1738	33	3.45224	-1.46727
	MV2_2	-	-	-	4.541	0.069	0.3067	0.0037	0.5932	0.107	0.0019	1724	18	1738	12	1744	32	1744	32	-1.14679	0.805524
	MV2_40	-	-	-	4.641	0.068	0.3132	0.0035	0.64658	0.1073	0.0018	1755	17	1755	12	1750	31	1750	31	0.285714	0
	MV2_100	-	-	-	4.676	0.071	0.3147	0.004	0.6468	0.1079	0.0018	1763	20	1761	13	1760	31	1760	31	0.170455	-0.113572
	MV2_57	-	-	-	4.773	0.085	0.3054	0.0046	0.61352	0.1133	0.0022	1717	23	1778	15	1847	35	1847	35	-7.03844	3.43082
	MV2_50	-	-	-	5.24	0.15	0.3253	0.0063	0.68459	0.1165	0.0027	1814	31	1854	24	1895	43	1895	43	-4.27441	2.1575
	MV2_73	-	-	-	5.83	0.22	0.3391	0.0073	0.87804	0.1234	0.0032	1879	36	1933	35	1999	46	1999	46	-6.003	2.79359
	MV2_91	-	-	-	10.1	0.19	0.4603	0.0071	0.667	0.159	0.003	2439	32	2441	17	2441	32	2441	32	-0.0819336	0.0819336
	MV2_108	-	-	-	10.99	0.18	0.4686	0.0072	0.65827	0.1699	0.003	2476	32	2520	15	2555	31	2555	31	-3.09198	1.74603
	MV2_64	-	-	-	14.15	0.26	0.5339	0.0086	0.75564	0.1923	0.0034	2755	36	2761	18	2757	29	2757	29	-0.0725426	0.217313
	MV2_120	-	-	-	17.18	0.27	0.5717	0.0079	0.78152	0.2179	0.0035	2912	32	2942	15	2962	26	2962	26	-1.68805	1.01971
	U-Pb LA-ICPMS detrital zircon data
	Sample Location: Coolum, Queensland (sample name: NM2; Coolum, Queensland)
	Formation: Myrtle Creek Sandstone
	Sample #	Th (PPM)	U (PPM)	Th/U	Pb207	±	Pb206	±	Error	Pb207	±	Pb206	± 2σ	Pb207	± 2σ	Pb207	± 2σ	Preferred	± 2σ	Pb-Pb/U-Pb Discordance (%)	U-Pb/U-Pb Discordance (%)
	NM2				/U235	2σ	/U238	2σ	Corr.	/Pb206	2σ	/U238 (Ma)	(Ma)	/U235	(Ma)	/Pb206	(Ma)	Age	(Ma)
	NM2_43	-	-	-	0.2183	0.0076	0.03209	0.00051	0.18597	0.0495	0.0017	203.6	3.2	199.7	6.3	156	73	203.6	3.2	30.5128	-1.95293
	NM2_37	-	-	-	0.2801	0.0073	0.03956	0.00059	0.11317	0.0518	0.0014	250.1	3.7	250.1	5.7	249	58	250.1	3.7	0.441767	0
	NM2_47	-	-	-	0.2838	0.0065	0.04049	0.00058	0.21852	0.0508	0.0012	255.9	3.6	253.2	5.1	215	50	255.9	3.6	1.2605	-1.06635
	NM_112	-	-	-	0.2962	0.008	0.0411	0.00067	0.16659	0.0523	0.0014	259.6	4.1	262.6	6.2	279	61	259.6	4.1	-6.95341	1.14242
	NM_94	-	-	-	0.304	0.0061	0.04301	0.00062	-0.027286	0.051	0.0012	271.4	3.9	269	4.7	219	47	271.4	3.9	23.9269	-0.892193
	NM_109	-	-	-	0.3126	0.0073	0.04318	0.00069	0.35472	0.0525	0.0012	272.5	4.3	276.1	5.7	281	50	272.5	4.3	-3.02491	1.30388
	NM2_4	-	-	-	0.421	0.024	0.05513	0.0011	-0.18877	0.0546	0.0034	345.9	6.6	354	17	330	130	345.9	6.6	4.81818	2.28814
	NM_66	-	-	-	0.657	0.013	0.0832	0.0012	0.13389	0.0574	0.0011	515.1	6.9	511.7	7.7	488	44	515.1	6.9	5.55328	-0.664452
	NM_68	-	-	-	0.679	0.017	0.08382	0.0011	0.31507	0.0588	0.0012	518.8	6.7	525.1	9.6	546	40	518.8	6.7	-4.98168	1.19977
	NM2_21	-	-	-	0.654	0.02	0.08385	0.0013	0.21304	0.0578	0.0019	519	7.7	508	13	476	70	519	7.7	9.03361	-2.16535
	NM2_32	-	-	-	0.663	0.018	0.08445	0.0012	0.16961	0.0573	0.0016	522.5	7.1	514	11	464	60	522.5	7.1	12.6078	-1.6537
	NM_86	-	-	-	0.679	0.017	0.0853	0.0014	0.13709	0.0582	0.0015	527.6	8.1	524	10	502	57	527.6	8.1	5.0996	-0.687023
	NM_80	-	-	-	0.688	0.014	0.08568	0.0013	0.237	0.0586	0.0012	529.8	7.7	530.2	8.3	531	44	529.8	7.7	-0.225989	0.0754432
	NM2_15	-	-	-	0.666	0.015	0.08606	0.0011	0.26974	0.0579	0.0012	532.2	6.6	517.5	8.9	511	48	532.2	6.6	4.14873	-2.84058
	NM_64	-	-	-	0.6959	0.008	0.08678	0.0011	0.26193	0.0583	0.00069	536.4	6.4	535.8	4.8	531	26	536.4	6.4	1.01695	-0.111982
	NM_77	-	-	-	0.692	0.01	0.08728	0.0013	0.43892	0.05766	0.0008	539.4	7.6	532.9	6.2	507	31	539.4	7.6	6.39053	-1.21974
	NM_79	-	-	-	0.715	0.019	0.0878	0.0015	0.2099	0.0596	0.0017	542.4	8.8	546	12	546	62	542.4	8.8	-0.659341	0.659341
	NM_95	-	-	-	0.708	0.012	0.0883	0.0013	0.48349	0.05822	0.00088	545.4	7.9	542.3	7.1	526	33	545.4	7.9	3.68821	-0.571639
	NM_53	-	-	-	0.724	0.015	0.08882	0.0012	0.15169	0.0592	0.0012	548.5	7	551.1	8.8	551	46	548.5	7	-0.453721	0.471784
	NM2_16	-	-	-	0.701	0.02	0.0892	0.0015	0.11546	0.0588	0.0018	550.9	8.8	539	12	539	67	550.9	8.8	2.20779	-2.20779
	NM_85	-	-	-	0.718	0.011	0.0893	0.0013	0.37224	0.05835	0.00087	551.3	7.8	548.7	6.6	531	33	551.3	7.8	3.82298	-0.473847
	NM2_42	-	-	-	0.72	0.01	0.09017	0.0011	0.39064	0.05789	0.00082	556.5	6.5	550.2	6.2	519	31	556.5	6.5	7.22543	-1.14504
	NM_105	-	-	-	0.742	0.013	0.0905	0.0014	0.39241	0.0595	0.001	558.4	8.3	562.4	7.8	570	37	558.4	8.3	-2.03509	0.711238
	NM_84	-	-	-	0.738	0.017	0.0905	0.0013	0.41296	0.0593	0.0013	558.5	7.6	561	9.3	572	41	558.5	7.6	-2.36014	0.445633
	NM2_17	-	-	-	0.72	0.018	0.0908	0.0014	-0.024349	0.0584	0.0015	560	8.6	549	11	514	57	560	8.6	8.94942	-2.00364
	NM2_24	-	-	-	0.7264	0.011	0.0908	0.0011	0.25695	0.05811	0.0009	560.2	6.7	554	6.5	524	34	560.2	6.7	6.9084	-1.11913
	NM2_18	-	-	-	0.734	0.017	0.09124	0.0013	0.26246	0.0587	0.0013	562.8	7.5	558	9.6	536	49	562.8	7.5	5	-0.860215
	NM2_25	-	-	-	0.758	0.052	0.0913	0.0025	0.14197	0.0592	0.0041	563	15	565	31	500	150	563	15	12.6	0.353982
	NM_73	-	-	-	0.7515	0.0099	0.09244	0.0013	0.5509	0.05915	0.00065	569.9	7.5	568.4	5.8	564	24	569.9	7.5	1.0461	-0.263899
	NM_98	-	-	-	0.7549	0.0097	0.0924	0.0014	0.64589	0.05926	0.00064	569.9	8.5	570.4	5.6	568	24	569.9	8.5	0.334507	0.0876578
	NM_59	-	-	-	0.777	0.045	0.0926	0.002	0.093292	0.0616	0.0036	570	12	573	26	520	130	570	12	9.61538	0.52356
	NM_69	-	-	-	0.767	0.013	0.0926	0.0013	0.29583	0.0603	0.001	570.8	7.7	577.4	7.4	599	36	570.8	7.7	-4.70785	1.14306
	NM2_9	-	-	-	0.7383	0.012	0.09268	0.0011	0.013641	0.05819	0.00097	571.3	6.6	560.8	6.9	525	36	571.3	6.6	8.81905	-1.87233
	NM2_48	-	-	-	0.732	0.013	0.09272	0.0012	0.4163	0.05787	0.00095	571.5	7.1	557.8	7.7	520	36	571.5	7.1	9.90385	-2.45608
	NM2_39	-	-	-	0.731	0.049	0.0921	0.0031	0.31262	0.0593	0.0042	572	16	560	31	520	150	572	16	10	-2.14286
	NM_70	-	-	-	0.778	0.0097	0.0931	0.0013	0.56858	0.06086	0.00073	573.8	7.6	583.8	5.7	628	25	573.8	7.6	-8.63057	1.71292
	NM_88	-	-	-	0.769	0.015	0.0936	0.0014	0.25229	0.0596	0.0011	576.7	8	577.9	8.4	569	42	576.7	8	1.35325	0.207648
	NM2_40	-	-	-	0.76	0.018	0.09427	0.0013	0.06793	0.0585	0.0015	580.7	7.8	573.9	10	521	55	580.7	7.8	11.4587	-1.18488
	NM2_51	-	-	-	0.757	0.024	0.0944	0.0016	0.17946	0.0585	0.0019	581.5	9.5	570	14	508	72	581.5	9.5	14.4685	-2.01754
	NM_58	-	-	-	0.794	0.013	0.0964	0.0015	0.65162	0.05978	0.00072	592.9	8.7	592	7.5	585	26	592.9	8.7	1.35043	-0.152027
	NM2_33	-	-	-	0.801	0.025	0.0965	0.0017	0.36551	0.0612	0.0017	594	9.8	595	14	619	61	594	9.8	-4.03877	0.168067
	NM_96	-	-	-	0.815	0.015	0.09688	0.0013	0.2958	0.0609	0.0011	596	7.9	603.6	8.2	615	39	596	7.9	-3.08943	1.25911
	NM_108	-	-	-	0.796	0.011	0.097	0.0016	0.76925	0.0596	0.00058	596.7	9.5	595.5	6.6	582	21	596.7	9.5	2.52577	-0.201511
	NM2_13	-	-	-	0.7931	0.012	0.09701	0.0012	0.16109	0.05944	0.00088	596.8	7.1	592.4	6.6	581	32	596.8	7.1	2.71945	-0.742741
	NM_110	-	-	-	0.805	0.012	0.0971	0.0015	0.63288	0.06006	0.00071	597.3	8.9	598.4	6.6	595	26	597.3	8.9	0.386555	0.183824
	NM_61	-	-	-	0.796	0.012	0.09714	0.0013	0.19303	0.05955	0.00097	597.5	7.6	593.7	7	573	36	597.5	7.6	4.27574	-0.640054
	NM_107	-	-	-	0.811	0.014	0.0973	0.0015	0.47138	0.06056	0.00094	598.6	8.6	601.9	7.7	607	34	598.6	8.6	-1.38386	0.548264
	NM_75	-	-	-	0.822	0.014	0.0975	0.0014	0.34406	0.061	0.00095	599.6	7.8	608	7.8	623	34	599.6	7.8	-3.75602	1.38158
	NM2_35	-	-	-	0.808	0.017	0.0977	0.0014	0.083422	0.06	0.0013	600.5	8.4	600	9.6	580	49	600.5	8.4	3.53448	-0.0833333
	NM2_46	-	-	-	0.81	0.017	0.09797	0.0012	0.59766	0.0602	0.0012	602.5	7.1	601.2	9.3	595	43	602.5	7.1	1.2605	-0.216234
	NM_76	-	-	-	0.81	0.01	0.0993	0.0014	0.37474	0.0591	0.00069	610	8.1	601.6	5.7	565	26	610	8.1	7.9646	-1.39628
	NM_56	-	-	-	0.8186	0.0067	0.09973	0.0012	0.32199	0.05944	0.00047	612.8	6.9	607	3.7	581	17	612.8	6.9	5.47332	-0.955519
	NM_102	-	-	-	0.832	0.015	0.0999	0.0016	-0.051623	0.0605	0.001	613.5	9.2	613.3	8.1	603	37	613.5	9.2	1.74129	-0.0326105
	NM_87	-	-	-	0.875	0.019	0.1025	0.0018	0.74338	0.06177	0.0009	628.8	10	636	10	652	32	628.8	10	-3.55828	1.13208
	NM_83	-	-	-	0.887	0.017	0.103	0.0019	0.82516	0.06232	0.00068	631.6	11	643.4	9.1	682	23	631.6	11	-7.39003	1.83401
	NM_97	-	-	-	0.872	0.011	0.1041	0.0016	0.5839	0.06078	0.00068	638.3	9.2	635.9	6	623	24	638.3	9.2	2.45586	-0.377418
	NM_100	-	-	-	0.87	0.028	0.1046	0.0019	0.67556	0.0608	0.0022	641	11	634	14	615	57	641	11	4.22764	-1.1041
	NM_57	-	-	-	0.899	0.013	0.10558	0.0013	0.22944	0.06184	0.0009	647	7.5	650	6.9	654	32	647	7.5	-1.07034	0.461538
	NM_103	-	-	-	1.11	0.38	0.1101	0.0031	-0.01266	0.072	0.023	672	17	658	12	639	95	672	17	5.16432	-2.12766
	NM2_2	-	-	-	0.949	0.015	0.11019	0.0014	0.24299	0.06295	0.00095	673.8	7.9	677	7.7	700	33	673.8	7.9	-3.74286	0.472674
	NM_90	-	-	-	0.952	0.026	0.1125	0.0019	0.25398	0.0617	0.0016	687	11	675	14	613	59	687	11	12.0718	-1.77778
	NM2_19	-	-	-	0.955	0.014	0.11296	0.0014	0.17785	0.06104	0.00094	689.9	8.1	681	7.3	633	34	689.9	8.1	8.98894	-1.3069
	NM2_1	-	-	-	1.186	0.026	0.1228	0.0017	0.61551	0.06864	0.0012	746.7	9.5	793	12	881	37	746.7	9.5	-15.244	5.83859
	NM2_5	-	-	-	1.17	0.031	0.1307	0.0023	0.54319	0.0653	0.0015	793	13	784	15	771	50	793	13	2.85344	-1.14796
	NM_82	-	-	-	1.311	0.021	0.1338	0.002	0.41331	0.0711	0.001	809	11	849	9.5	948	29	809	11	-14.6624	4.71143
	NM_74	-	-	-	1.379	0.019	0.1423	0.0021	0.34581	0.0704	0.00093	858	12	879	8	929	27	858	12	-7.64263	2.38908
	NM_81	-	-	-	1.385	0.015	0.1472	0.002	0.64911	0.06827	0.00057	885.3	11	881.5	6.4	874	17	885.3	11	1.29291	-0.431083
	NM_60	-	-	-	1.474	0.027	0.1507	0.0025	0.22854	0.071	0.001	904.8	14	919	11	942	30	904.8	14	-3.94904	1.54516
	NM2_38	-	-	-	1.44	0.022	0.152	0.002	0.084702	0.06863	0.0011	911.8	11	904.9	9.1	878	33	911.8	11	3.84966	-0.762515
	NM_104	-	-	-	1.494	0.019	0.1524	0.0026	0.72449	0.07117	0.00072	914	15	926.8	7.7	955	21	914	15	-4.29319	1.3811
	NM2_3	-	-	-	1.517	0.028	0.1592	0.0021	0.13077	0.0699	0.0013	952.1	11	936.3	11	910	38	952.1	11	4.62637	-1.68749
	NM2_20	-	-	-	1.562	0.026	0.1592	0.002	0.16881	0.07115	0.0012	952.2	11	953.9	10	954	35	952.2	11	-0.188679	0.178216
	NM2_28	-	-	-	1.501	0.052	0.1596	0.0031	0.11771	0.0702	0.0026	954	17	929	21	881	79	954	17	8.28604	-2.69107
	NM2_41	-	-	-	1.695	0.026	0.1694	0.0022	0.4374	0.07355	0.0011	1008.7	12	1005.9	9.8	1023	31	1023	31	-1.39785	-0.278358
	NM2_26	-	-	-	1.848	0.027	0.182	0.0024	0.28741	0.07376	0.0011	1077.6	13	1062.5	9.8	1027	31	1027	31	4.92697	-1.42118
	NM_99	-	-	-	1.703	0.022	0.1674	0.0026	0.43424	0.07384	0.00092	997	14	1008.1	8.2	1030	25	1030	25	-3.20388	1.10108
	NM2_45	-	-	-	1.608	0.035	0.1577	0.0024	0.17144	0.0743	0.0017	943.6	13	973	13	1033	47	1033	47	-8.6544	3.02158
	NM2_30	-	-	-	1.733	0.043	0.1764	0.0028	0.095647	0.0717	0.0019	1047	15	1016	16	940	54	1047	15	11.383	-3.05118
	NM_89	-	-	-	1.815	0.051	0.1768	0.0025	0.49704	0.0746	0.0022	1049	14	1049	17	1048	48	1048	48	0.0954198	0
	NM_54	-	-	-	1.803	0.015	0.1752	0.0021	0.3831	0.0746	0.0006	1040.6	11	1046	5.5	1053	16	1053	16	-1.17759	0.516252
	NM_78	-	-	-	1.951	0.021	0.1872	0.0026	0.62832	0.07562	0.00067	1105.8	14	1098.3	7.4	1084	18	1084	18	2.01107	-0.682874
	NM2_29	-	-	-	1.824	0.048	0.1794	0.0029	0.50155	0.0765	0.0016	1064	16	1052	17	1100	40	1100	40	-3.27273	-1.14068
	NM2_7	-	-	-	2.112	0.033	0.1979	0.0025	0.026181	0.07791	0.0012	1163.9	13	1151.4	11	1136	32	1136	32	2.45599	-1.08563
	NM2_36	-	-	-	2.914	0.074	0.2296	0.0041	0.89556	0.09043	0.0013	1332	21	1380	19	1432	28	1432	28	-6.98324	3.47826
	NM2_12	-	-	-	3.402	0.071	0.2645	0.0039	0.2509	0.0936	0.0019	1512	20	1502	17	1490	41	1490	41	1.47651	-0.665779
	NM2_49	-	-	-	3.721	0.049	0.2816	0.0034	0.4552	0.09638	0.0012	1599.3	17	1575.6	10	1552	23	1552	23	3.04768	-1.50419
	NM2_11	-	-	-	3.925	0.056	0.2871	0.0035	0.21563	0.0991	0.0014	1626.9	18	1618.7	12	1601	27	1601	27	1.61774	-0.506579
	NM_111	-	-	-	4.448	0.045	0.3022	0.0044	0.58607	0.1069	0.001	1701	22	1719.9	8.5	1744	18	1701	22	-2.4656	1.0989
	NM_72	-	-	-	4.483	0.043	0.3078	0.0041	0.5998	0.10578	0.00083	1729	20	1726.5	7.9	1724	14	1724	14	0.290023	-0.144802
	NM_55	-	-	-	4.668	0.026	0.3168	0.0036	0.38802	0.10661	0.00051	1774.1	18	1761.2	4.5	1740	8.8	1740	8.8	1.95977	-0.732455
	NM2_34	-	-	-	5.081	0.065	0.3308	0.0042	0.32819	0.11152	0.0014	1842	20	1831.9	11	1823	24	1823	24	1.04224	-0.55134
	NM_93	-	-	-	5.997	0.072	0.3556	0.0051	0.49415	0.1224	0.0014	1960	24	1974	10	1984	20	1984	20	-1.20968	0.70922
	NM2_50	-	-	-	12.574	0.15	0.498	0.0066	0.53025	0.1835	0.0022	2604	28	2647.3	11	2682	20	2682	20	-2.90828	1.63563
	NM2_27	-	-	-	13.47	0.19	0.5305	0.0067	0.33756	0.184	0.0025	2743	28	2711.2	13	2686	23	2686	23	2.12211	-1.17291
	NM2_31	-	-	-	17.95	0.46	0.5535	0.0089	0.84001	0.233	0.0035	2837	37	2976	25	3067	24	3067	24	-192.501	4.6707
	NM2_10	-	-	-	17.08	0.36	0.5277	0.0096	0.50641	0.2352	0.0043	2728	40	2933	21	3084	30	3084	30	-11.5435	6.98943
	NM_101	-	-	-	91	11	0.92	0.11	0.64254	0.627	0.037	3830	360	4030	200	4440	120	3830	360	-13.7387	4.96278
	U-Pb LA-ICPMS detrital zircon data
	Sample Location: Noosa Headland, Queensland (sample name: NM3; Noosa Headland, Queensland)
	Formation: Myrtle Creek Sandstone
	Sample #	Th (PPM)	U (PPM)	Th/U	Pb207	±	Pb206	±	Error	Pb207	±	Pb206	± 2σ	Pb207	± 2σ	Pb207	± 2σ	Preferred	± 2σ	Pb-Pb/U-Pb Discordance (%)	U-Pb/U-Pb Discordance (%)
	NM3				/U235	2σ	/U238	2σ	Corr.	/Pb206	2σ	/U238 (Ma)	(Ma)	/U235	(Ma)	/Pb206	(Ma)	Age	(Ma)
	NM3_70	-	-	-	0.2121	0.0081	0.03058	0.00053	0.075963	0.0506	0.002	194.2	3.3	194.5	6.8	190	84	194.2	3.3	-2.21053	0.154242
	NM3_60	-	-	-	0.2142	0.0058	0.03077	0.00045	0.24641	0.0506	0.0014	195.4	2.8	196.7	4.8	204	60	195.4	2.8	4.21569	0.660905
	NM3_104	-	-	-	0.2129	0.0078	0.03088	0.00054	0.1148	0.0503	0.0019	196	3.4	195.3	6.6	179	81	196	3.4	-9.49721	-0.358423
	NM3_94	-	-	-	0.222	0.0074	0.03174	0.00064	0.36795	0.0507	0.0017	201.4	4	203.2	6.2	217	74	201.4	4	7.18894	0.885827
	NM3_68	-	-	-	0.221	0.0079	0.03194	0.00073	0.36837	0.0505	0.0018	202.6	4.6	202.4	6.5	212	80	202.6	4.6	4.43396	-0.0988142
	NM3_86	-	-	-	0.2367	0.0071	0.03372	0.00059	0.40646	0.0507	0.0015	213.7	3.7	215.3	5.8	214	67	213.7	3.7	0.140187	0.743149
	NM3_79	-	-	-	0.241	0.012	0.03434	0.00084	0.45544	0.0504	0.0025	217.6	5.3	219.3	9.6	190	110	217.6	5.3	-14.5263	0.775194
	NM3_35	-	-	-	0.2633	0.006	0.03723	0.00052	0.36927	0.05098	0.0012	235.7	3.2	237.2	4.8	232	53	235.7	3.2	-1.59483	0.632378
	NM3_116	-	-	-	0.2746	0.0077	0.03877	0.00055	0.085001	0.0518	0.0015	245.2	3.4	245.8	6.1	251	63	245.2	3.4	2.31076	0.244101
	NM3_23	-	-	-	0.2759	0.0081	0.03878	0.00054	0.26142	0.0513	0.0015	245.3	3.3	247	6.4	237	65	245.3	3.3	-3.50211	0.688259
	NM3_72	-	-	-	0.289	0.012	0.04079	0.0008	0.37592	0.0511	0.0021	257.7	5	256.9	9.5	222	89	257.7	5	-16.0811	-0.311405
	NM3_99	-	-	-	0.3995	0.011	0.05445	0.00086	0.52471	0.053	0.0014	341.8	5.2	340.5	7.7	313	60	341.8	5.2	-9.20128	-0.381791
	NM3_29	-	-	-	0.468	0.018	0.06216	0.00093	0.066908	0.0545	0.0022	388.7	5.6	390	13	361	85	388.7	5.6	-7.67313	0.333333
	NM3_28	-	-	-	0.4768	0.0096	0.06353	0.00076	0.51324	0.05394	0.0011	397	4.6	395.7	6.6	363	46	397	4.6	-9.36639	-0.328532
	NM3_31	-	-	-	0.622	0.016	0.07837	0.001	0.27736	0.057	0.0015	486.3	6.1	489.9	10	466	59	486.3	6.1	-4.35622	0.734844
	NM3_9	-	-	-	0.613	0.015	0.07907	0.00096	-0.020268	0.0569	0.0015	490.5	5.7	484.4	9.4	463	57	490.5	5.7	-5.93952	-1.25929
	NM3_6	-	-	-	0.646	0.015	0.08222	0.001	0.12896	0.05783	0.0014	509.3	5.9	504.9	9	505	52	509.3	5.9	-0.851485	-0.87146
	NM3_8	-	-	-	0.6461	0.012	0.08341	0.00093	0.27504	0.05663	0.0012	516.4	5.5	505.8	7.7	470	45	516.4	5.5	-9.87234	-2.09569
	NM3_117	-	-	-	0.678	0.018	0.0836	0.0015	0.57554	0.0593	0.0014	517.7	8.7	525.7	10	564	54	517.7	8.7	8.20922	1.52178
	NM3_114	-	-	-	0.673	0.017	0.0846	0.0014	0.43887	0.0579	0.0015	523.4	8.1	521.6	10	515	55	523.4	8.1	-1.63107	-0.345092
	NM3_5	-	-	-	0.6537	0.014	0.08473	0.0011	0.48141	0.05667	0.0012	524.3	6.5	510.3	8.6	472	48	524.3	6.5	-11.0805	-2.74348
	NM3_118	-	-	-	0.675	0.016	0.08478	0.0012	0.29	0.058	0.0014	524.5	7.1	522.5	9.5	512	55	524.5	7.1	-2.44141	-0.382775
	NM3_71	-	-	-	0.677	0.016	0.08532	0.0012	0.29329	0.0579	0.0014	527.7	7.4	523.6	10	506	55	527.7	7.4	-4.28854	-0.78304
	NM3_20	-	-	-	0.6733	0.013	0.08535	0.00099	0.63172	0.05678	0.0011	528	5.9	522.5	7.9	483	42	528	5.9	-9.31677	-1.05263
	NM3_10	-	-	-	0.674	0.015	0.08563	0.001	0.15371	0.0575	0.0014	529.6	6.2	522	9.4	500	53	529.6	6.2	-5.92	-1.45594
	NM3_77	-	-	-	0.677	0.015	0.08575	0.0013	0.50317	0.05716	0.0012	530.2	7.5	524.9	9.2	492	51	530.2	7.5	-7.76423	-1.00972
	NM3_73	-	-	-	0.705	0.024	0.0875	0.0015	0.21205	0.0589	0.0021	540.3	9.1	538	14	508	77	540.3	9.1	-6.35827	-0.427509
	NM3_52	-	-	-	0.725	0.025	0.08759	0.0013	0.1396	0.0603	0.0022	541.2	7.7	552	15	585	77	541.2	7.7	7.48718	1.95652
	NM3_105	-	-	-	0.6947	0.014	0.08764	0.0012	0.35861	0.05766	0.0013	541.5	7	535	8.6	515	48	541.5	7	-5.14563	-1.21495
	NM3_76	-	-	-	0.706	0.018	0.08837	0.0013	0.23545	0.0583	0.0015	545.8	7.6	541.3	10	517	55	545.8	7.6	-5.5706	-0.831332
	NM3_81	-	-	-	0.732	0.025	0.0889	0.0017	0.2462	0.0603	0.0021	549	9.9	556	15	565	78	549	9.9	2.83186	1.25899
	NM3_64	-	-	-	0.719	0.017	0.08997	0.0012	0.27936	0.05828	0.0014	555.3	6.9	548.8	9.9	525	54	555.3	6.9	-5.77143	-1.1844
	NM3_109	-	-	-	0.738	0.019	0.0903	0.0017	0.52459	0.05954	0.0014	557.1	10	561.8	11	577	54	557.1	10	3.44887	0.836597
	NM3_18	-	-	-	0.737	0.02	0.09051	0.0012	0.088623	0.0588	0.0016	558.5	7	558.6	12	534	63	558.5	7	-4.58801	0.0179019
	NM3_13	-	-	-	0.747	0.019	0.09126	0.0013	0.10958	0.0598	0.0016	562.9	7.5	565.9	11	566	61	562.9	7.5	0.547703	0.530129
	NM3_66	-	-	-	0.74	0.016	0.09138	0.0012	0.45348	0.05919	0.0013	563.6	7.2	562.6	9.4	561	48	563.6	7.2	-0.463458	-0.177746
	NM3_11	-	-	-	0.744	0.034	0.0915	0.0018	-0.036644	0.0593	0.0028	564.1	11	560	20	523	99	564.1	11	-7.85851	-0.732143
	NM3_91	-	-	-	0.738	0.016	0.0917	0.0015	0.6406	0.05832	0.0012	565.4	8.6	560.2	9.5	534	48	565.4	8.6	-5.88015	-0.92824
	NM3_39	-	-	-	0.7478	0.014	0.0919	0.0011	0.43291	0.05888	0.0012	566.7	6.5	567.1	7.9	557	43	566.7	6.5	-1.74147	0.0705343
	NM3_42	-	-	-	0.7455	0.014	0.09211	0.001	0.3654	0.059	0.0012	567.9	6.2	565.8	8.2	561	43	567.9	6.2	-1.22995	-0.371156
	NM3_2	-	-	-	0.7349	0.015	0.09231	0.0011	0.23553	0.05854	0.0013	569.1	6.5	558.8	8.7	539	47	569.1	6.5	-5.58442	-1.84324
	NM3_48	-	-	-	0.751	0.016	0.09231	0.0011	0.20001	0.05922	0.0013	569.1	6.6	568.1	9.1	562	48	569.1	6.6	-1.26335	-0.176025
	NM3_43	-	-	-	0.7524	0.014	0.09235	0.0011	0.44572	0.0592	0.0012	569.4	6.3	569.3	8.2	571	41	569.4	6.3	0.28021	-0.0175654
	NM3_3	-	-	-	0.738	0.021	0.0926	0.0014	0.1916	0.0588	0.0018	570.6	8.2	560	12	538	68	570.6	8.2	-6.05948	-1.89286
	NM3_113	-	-	-	0.7552	0.015	0.0931	0.0014	0.63346	0.05918	0.0012	573.8	8.1	570.6	8.9	567	45	573.8	8.1	-1.19929	-0.560813
	NM3_1	-	-	-	0.7552	0.015	0.09348	0.0011	0.24982	0.05923	0.0013	576.1	6.4	570.8	8.7	568	47	576.1	6.4	-1.42606	-0.928521
	NM3_101	-	-	-	0.77	0.028	0.0936	0.0018	0.13014	0.0602	0.0023	576.3	11	575	16	548	85	576.3	11	-5.16423	-0.226087
	NM3_33	-	-	-	0.81	0.031	0.094	0.0022	0.69743	0.0621	0.0018	579	13	601	17	678	68	579	13	14.6018	3.66057
	NM3_38	-	-	-	0.793	0.02	0.09411	0.0013	-0.086331	0.0612	0.0016	579.7	7.5	592.5	11	618	58	579.7	7.5	6.19741	2.16034
	NM3_41	-	-	-	0.7608	0.014	0.09417	0.0011	0.35195	0.05868	0.0012	580.1	6.5	574.1	8.2	550	43	580.1	6.5	-5.47273	-1.04511
	NM3_7	-	-	-	0.7589	0.014	0.09435	0.0011	0.34376	0.05896	0.0012	581.2	6.4	573	8.2	564	41	581.2	6.4	-3.04965	-1.43106
	NM3_22	-	-	-	0.766	0.02	0.09434	0.0013	0.25513	0.0584	0.0015	581.8	7.6	576.2	11	534	60	581.8	7.6	-8.95131	-0.971885
	NM3_84	-	-	-	0.775	0.019	0.0951	0.0015	0.29114	0.0593	0.0015	585.3	9	581.3	11	558	54	585.3	9	-4.89247	-0.688113
	NM3_37	-	-	-	0.807	0.021	0.09514	0.0014	0.12672	0.0617	0.0018	585.7	8	599.8	12	629	62	585.7	8	6.88394	2.35078
	NM3_102	-	-	-	0.769	0.019	0.0954	0.0015	0.31784	0.059	0.0015	587.1	8.9	577.9	11	553	55	587.1	8.9	-6.16637	-1.59197
	NM3_4	-	-	-	0.79	0.028	0.0956	0.0014	-0.0013913	0.0605	0.0024	588.6	8.4	588	15	576	78	588.6	8.4	-2.1875	-0.102041
	NM3_88	-	-	-	0.778	0.019	0.0957	0.0018	0.75993	0.05867	0.0013	589.2	11	583.7	11	549	48	589.2	11	-7.3224	-0.942265
	NM3_40	-	-	-	0.797	0.018	0.09581	0.0011	0.25017	0.06032	0.0014	589.7	6.7	594.1	9.9	600	50	589.7	6.7	1.71667	0.740616
	NM3_95	-	-	-	0.802	0.018	0.0962	0.0015	0.73238	0.06055	0.0013	592	9	597.6	10	615	45	592	9	3.73984	0.937082
	NM3_56	-	-	-	0.774	0.018	0.09625	0.0014	0.33454	0.0588	0.0014	592.4	8	581.2	10	548	52	592.4	8	-8.10219	-1.92705
	NM3_80	-	-	-	0.794	0.017	0.0969	0.0014	0.5417	0.05943	0.0013	596.8	8.6	592.4	9.7	571	48	596.8	8.6	-4.51839	-0.742741
	NM3_85	-	-	-	0.795	0.017	0.0974	0.0015	0.49773	0.05937	0.0013	598.7	9.1	592.8	9.9	566	49	598.7	9.1	-5.77739	-0.995277
	NM3_14	-	-	-	0.8096	0.015	0.09799	0.0011	0.32477	0.05988	0.0012	602.6	6.5	601.9	8.3	596	43	602.6	6.5	-1.10738	-0.116298
	NM3_115	-	-	-	0.813	0.017	0.09804	0.0013	0.17819	0.06063	0.0013	602.8	7.7	603.1	9.5	614	47	602.8	7.7	1.8241	0.049743
	NM3_75	-	-	-	0.814	0.018	0.0982	0.0015	0.43514	0.05997	0.0013	603.6	8.6	603.6	10	600	52	603.6	8.6	-0.6	0
	NM3_19	-	-	-	0.857	0.026	0.0983	0.0015	0.31832	0.0629	0.0019	604.5	8.5	627	14	690	65	604.5	8.5	12.3913	3.58852
	NM3_59	-	-	-	0.8075	0.016	0.09885	0.0012	0.36722	0.05962	0.0012	607.6	7.2	600.5	8.9	581	45	607.6	7.2	-4.57831	-1.18235
	NM3_61	-	-	-	0.814	0.018	0.09891	0.0013	0.4288	0.05975	0.0013	607.9	7.6	604	9.8	585	49	607.9	7.6	-3.91453	-0.645695
	NM3_106	-	-	-	0.85	0.027	0.0994	0.0016	0.15171	0.0623	0.0021	610.6	9.6	621	15	639	73	610.6	9.6	4.44444	1.67472
	NM3_26	-	-	-	0.83	0.017	0.09959	0.0012	0.47744	0.06005	0.0013	612	6.7	613	9.2	595	46	612	6.7	-2.85714	0.163132
	NM3_90	-	-	-	0.825	0.024	0.1003	0.002	0.66287	0.0593	0.0015	616	12	610	13	571	57	616	12	-7.88091	-0.983607
	NM3_89	-	-	-	0.826	0.021	0.1003	0.0017	0.48919	0.0596	0.0015	616.1	9.9	610.5	12	589	50	616.1	9.9	-4.60102	-0.917281
	NM3_15	-	-	-	0.843	0.023	0.1005	0.0016	0.83234	0.06062	0.0013	617.3	9.6	618	13	617	46	617.3	9.6	-0.0486224	0.113269
	NM3_96	-	-	-	0.839	0.02	0.1011	0.0016	0.42333	0.0604	0.0015	621.9	9.6	616.9	11	597	54	621.9	9.6	-4.17085	-0.810504
	NM3_63	-	-	-	0.862	0.019	0.10162	0.0013	0.16395	0.0618	0.0015	623.8	7.6	630.3	10	649	49	623.8	7.6	3.8829	1.03125
	NM3_93	-	-	-	0.831	0.018	0.1016	0.0015	0.50232	0.05925	0.0013	623.8	8.9	613.8	9.9	563	48	623.8	8.9	-10.7993	-1.6292
	NM3_111	-	-	-	0.839	0.018	0.1019	0.0015	0.59531	0.05997	0.0012	625.2	8.8	617.8	10	602	48	625.2	8.8	-3.85382	-1.1978
	NM3_34	-	-	-	0.873	0.02	0.1032	0.0015	0.68067	0.06089	0.0013	632.9	8.9	635.8	11	625	46	632.9	8.9	-1.264	0.456118
	NM3_110	-	-	-	0.859	0.027	0.1034	0.0023	0.62126	0.0606	0.0017	634	14	628	15	617	62	634	14	-2.75527	-0.955414
	NM3_30	-	-	-	0.887	0.018	0.10433	0.0012	0.24136	0.0612	0.0013	639.7	7.1	643.9	9.5	638	45	639.7	7.1	-0.266458	0.652275
	NM3_45	-	-	-	0.887	0.02	0.1057	0.0013	0.25849	0.06097	0.0014	647.7	7.4	643.5	11	621	51	647.7	7.4	-4.29952	-0.652681
	NM3_49	-	-	-	0.88	0.019	0.1063	0.0017	0.81444	0.06005	0.0012	651.2	10	640.3	10	602	42	651.2	10	-8.17276	-1.70233
	NM3_65	-	-	-	0.8833	0.017	0.1078	0.0015	0.68246	0.05991	0.0011	659.9	8.7	642.3	9	597	42	659.9	8.7	-10.536	-2.74015
	NM3_92	-	-	-	0.908	0.021	0.1081	0.002	0.78316	0.06083	0.0012	661.7	12	655.4	11	629	44	661.7	12	-5.19873	-0.961245
	NM3_98	-	-	-	0.917	0.02	0.1087	0.0016	0.24188	0.06115	0.0014	665.2	9.1	659.4	11	634	51	665.2	9.1	-4.92114	-0.879588
	NM3_103	-	-	-	0.975	0.02	0.1115	0.0015	0.59109	0.0636	0.0013	681.1	9	690.1	10	720	44	681.1	9	5.40278	1.30416
	NM3_21	-	-	-	1.0279	0.019	0.11629	0.0013	0.43668	0.06371	0.0012	709.1	7.7	717.4	9.6	729	42	709.1	7.7	2.72977	1.15696
	NM3_87	-	-	-	1.247	0.026	0.136	0.0021	0.63465	0.06634	0.0014	821.6	12	821	12	810	45	821.6	12	-1.4321	-0.0730816
	NM3_50	-	-	-	1.359	0.027	0.1416	0.0018	0.63272	0.0699	0.0013	853.5	10	870.2	12	921	40	853.5	10	7.32899	1.9191
	NM3_69	-	-	-	1.407	0.037	0.1439	0.0029	0.77432	0.07122	0.0016	866	17	889	16	953	45	866	17	9.12907	2.58718
	NM3_44	-	-	-	1.424	0.027	0.15127	0.0017	0.10464	0.06859	0.0013	908	9.6	899.5	11	881	41	908	9.6	-3.0647	-0.944969
	NM3_108	-	-	-	1.523	0.04	0.1568	0.003	0.71151	0.0707	0.0016	938	17	936	16	940	47	938	17	0.212766	-0.213675
	NM3_16	-	-	-	1.604	0.031	0.1598	0.002	0.21883	0.07255	0.0015	955.4	11	971.1	12	996	43	955.4	11	4.07631	1.61672
	NM3_78	-	-	-	1.565	0.038	0.1611	0.0027	0.56093	0.0705	0.0016	963	15	954	15	927	49	963	15	-3.8835	-0.943396
	NM3_32	-	-	-	1.646	0.04	0.1632	0.0027	0.88327	0.0725	0.0014	974	15	985	16	996	42	974	15	2.20884	1.11675
	NM3_24	-	-	-	1.656	0.032	0.16621	0.0019	0.34308	0.0717	0.0015	991.1	10	990.7	12	973	41	991.1	10	-1.86023	-0.0403755
	NM3_17	-	-	-	1.653	0.029	0.16451	0.0018	0.47528	0.07265	0.0014	981.8	10	990.9	11	1001	38	1001	38	1.91808	0.918357
	NM3_58	-	-	-	1.408	0.051	0.1394	0.0034	0.89719	0.0729	0.0017	840	19	885	21	1004	48	1004	48	16.3347	5.08475
	NM3_55	-	-	-	1.431	0.032	0.1429	0.0018	0.20441	0.0734	0.0017	860.7	10	901.3	13	1009	47	1009	47	14.6977	4.5046
	NM3_47	-	-	-	1.651	0.03	0.1642	0.002	0.54032	0.07301	0.0014	979.9	11	989.2	12	1010	38	1010	38	2.9802	0.940154
	NM3_46	-	-	-	1.697	0.036	0.1675	0.0024	0.7343	0.07348	0.0015	997.8	13	1005.6	14	1023	39	1023	39	2.46334	0.775656
	NM3_57	-	-	-	1.781	0.036	0.1754	0.0021	0.1411	0.07401	0.0015	1041.6	11	1037.1	13	1035	41	1035	41	-0.637681	-0.433902
	NM3_53	-	-	-	1.836	0.039	0.18	0.0025	0.4009	0.0747	0.0017	1066.6	14	1057.5	14	1047	45	1047	45	-1.87202	-0.86052
	NM3_12	-	-	-	1.776	0.039	0.1701	0.0025	0.63143	0.07574	0.0016	1012	14	1035.5	14	1083	42	1083	42	6.55586	2.26944
	NM3_25	-	-	-	2.194	0.042	0.2013	0.0024	0.45569	0.07855	0.0015	1182.1	13	1178.1	13	1155	40	1155	40	-2.34632	-0.33953
	NM3_54	-	-	-	3.598	0.069	0.271	0.0037	0.82036	0.09685	0.0018	1545	19	1548.5	15	1562	35	1562	35	1.08835	0.226025
	NM3_82	-	-	-	3.616	0.075	0.2708	0.0041	0.2335	0.0974	0.002	1544	21	1551	17	1568	38	1568	38	1.53061	0.451322
	NM3_62	-	-	-	4.389	0.079	0.3081	0.0039	0.6936	0.10383	0.0019	1732	19	1709.3	15	1692	35	1692	35	-2.36407	-1.32803
	NM3_83	-	-	-	5.35	0.15	0.3258	0.0097	0.69548	0.1207	0.0033	1816	47	1874	24	1958	49	1958	49	7.2523	3.09498
	NM3_97	-	-	-	5.955	0.12	0.3523	0.0051	0.69106	0.1226	0.0024	1945	24	1968.5	16	1992	35	1992	35	2.35944	1.1938
	NM3_27	-	-	-	6.233	0.11	0.3624	0.0042	0.61586	0.12395	0.0023	1993	20	2008.3	15	2013	34	2013	34	0.993542	0.761838
	NM3_51	-	-	-	11.552	0.2	0.4576	0.0055	0.70263	0.18406	0.0034	2428	24	2567.9	16	2687.9	30	2687.9	30	9.66926	5.44803
	NM3_67	-	-	-	14.17	0.26	0.5007	0.0061	0.56836	0.206	0.0039	2616	26	2760.3	17	2872	31	2872	31	8.91365	5.22769
	NM3_112	-	-	-	16.41	0.31	0.5791	0.0088	0.79477	0.2077	0.004	2943	36	2901	19	2886	31	2886	31	-1.97505	-1.44778
	U-Pb LA-ICPMS detrital zircon data
	Sample Location: Alexandra Headland, Queensland (sample name: NM5; Alexandra Headland, Queensland)
	Formation: Myrtle Creek Sandstone
	Sample #	Th (PPM)	U (PPM)	Th/U	Pb207	±	Pb206	±	Error	Pb207	±	Pb206	± 2σ	Pb207	± 2σ	Pb207	± 2σ	Preferred	± 2σ	Pb-Pb/U-Pb Discordance (%)	U-Pb/U-Pb Discordance (%)
	NM5				/U235	2σ	/U238	2σ	Corr.	/Pb206	2σ	/U238 (Ma)	(Ma)	/U235	(Ma)	/Pb206	(Ma)	Age	(Ma)
	NM5_24	-	-	-	0.202	0.014	0.02919	0.00077	0.05807	0.0515	0.0039	185.4	4.8	186	13	150	150	185.4	4.8	23.6	0.322581
	NM5_63	-	-	-	0.206	0.011	0.02922	0.00068	0.13259	0.0513	0.0028	185.6	4.2	190.7	8.6	190	110	185.6	4.2	-2.31579	2.67436
	NM5_66	-	-	-	0.2019	0.008	0.02928	0.00062	0.22534	0.05	0.002	186	3.9	186.2	6.8	166	83	186	3.9	12.0482	0.107411
	NM5_78	-	-	-	0.207	0.01	0.02936	0.00063	0.20217	0.051	0.0025	186.5	4	190.1	8.5	190	100	186.5	4	-1.84211	1.89374
	NM5_54	-	-	-	0.201	0.011	0.02945	0.00064	0.11333	0.0496	0.0027	187.1	4	185.2	9	130	110	187.1	4	43.9231	-1.02592
	NM5_5	-	-	-	0.2055	0.0094	0.02947	0.00059	0.015527	0.0508	0.0024	187.2	3.7	189.2	8	210	110	187.2	3.7	-10.8571	1.05708
	NM5_53	-	-	-	0.2027	0.0089	0.02972	0.00061	0.29937	0.0496	0.0021	188.8	3.8	186.6	7.5	145	89	188.8	3.8	30.2069	-1.17899
	NM5_87	-	-	-	0.2062	0.0098	0.03003	0.00079	0.23346	0.05	0.0024	190.7	4.9	189.4	8.3	153	98	190.7	4.9	24.6405	-0.686378
	NM5_9	-	-	-	0.215	0.019	0.03016	0.001	-0.084728	0.0525	0.005	191.5	6.3	195	16	200	190	191.5	6.3	-4.25	1.79487
	NM5_74	-	-	-	0.2117	0.007	0.03044	0.00064	0.41437	0.05	0.0015	193.2	4	194.5	5.9	183	67	193.2	4	5.57377	0.66838
	NM5_70	-	-	-	0.223	0.01	0.03049	0.00079	0.2146	0.0529	0.0026	193.6	4.9	204.2	8.7	290	110	193.6	4.9	-33.2414	5.19099
	NM5_33	-	-	-	0.2471	0.01	0.03503	0.00066	0.076701	0.0507	0.0021	221.9	4.1	224.3	8.5	210	92	221.9	4.1	5.66667	1.07
	NM5_1	-	-	-	0.264	0.011	0.03708	0.0007	0.082298	0.0518	0.0023	234.7	4.4	236.8	8.9	237	94	234.75	4.4	-0.970464	0.886824
	NM5_19	-	-	-	0.3	0.012	0.04119	0.00073	0.16848	0.0528	0.0022	260.2	4.5	266.2	9.8	279	89	260.2	4.5	-6.73835	2.25394
	NM5_15	-	-	-	0.319	0.02	0.0441	0.0015	0.1549	0.0531	0.0035	278.2	9	279	15	260	140	278.2	9	7	0.286738
	NM5_60	-	-	-	0.4	0.015	0.05273	0.0011	0.28869	0.0547	0.002	331.2	6.8	342.7	10	372	82	331.2	6.8	-10.9677	3.3557
	NM5_77	-	-	-	0.646	0.023	0.0812	0.0016	0.35012	0.0576	0.0019	502.9	9.6	503	14	472	73	502.9	9.6	6.54661	0.0198807
	NM5_52	-	-	-	0.653	0.017	0.0818	0.0015	0.30581	0.0575	0.0015	506.7	9.1	509.2	10	492	58	506.7	9.1	2.9878	0.490966
	NM5_95	-	-	-	0.674	0.024	0.0824	0.0015	0.16979	0.0596	0.0023	510.5	9.2	521	15	535	82	510.5	9.2	-4.57944	2.01536
	NM5_26	-	-	-	0.699	0.033	0.0848	0.0018	0.075574	0.0601	0.003	524.5	11	533	20	520	110	524.5	11	0.865385	1.59475
	NM5_97	-	-	-	0.6779	0.012	0.08489	0.0013	0.44082	0.0578	0.001	525.2	7.6	525	7.5	512	38	525.2	7.6	2.57813	-0.0380952
	NM5_13	-	-	-	0.685	0.024	0.0851	0.0017	0.2737	0.0585	0.0021	526.4	10	528	15	520	78	526.4	10	1.23077	0.30303
	NM5_4	-	-	-	0.71	0.032	0.0863	0.0018	0.11444	0.0596	0.0027	533.3	11	543	19	542	99	533.3	11	-1.60517	1.78637
	NM5_69	-	-	-	0.715	0.024	0.0875	0.0021	0.34155	0.0592	0.002	541	12	546	14	549	74	541	12	-1.45719	0.915751
	NM5_90	-	-	-	0.712	0.021	0.0884	0.002	0.48231	0.0579	0.0016	546	12	544	13	503	63	546	12	8.54871	-0.367647
	NM5_75	-	-	-	0.727	0.017	0.0891	0.0016	0.54866	0.0585	0.0012	549.8	9.8	553.4	10	538	46	549.8	9.8	2.19331	0.650524
	NM5_100	-	-	-	0.722	0.019	0.0891	0.0017	0.19826	0.0588	0.0016	549.9	9.8	550	11	538	61	549.9	9.8	2.2119	0.0181818
	NM5_12	-	-	-	0.728	0.02	0.0891	0.0014	0.16725	0.0592	0.0017	550.2	8.5	554	12	544	62	550.2	8.5	1.13971	0.685921
	NM5_48	-	-	-	0.716	0.016	0.0891	0.0016	0.54122	0.05811	0.0012	551	9.7	547	9.5	519	44	551	9.7	6.1657	-0.731261
	NM5_7	-	-	-	0.729	0.032	0.0902	0.002	0.18652	0.0592	0.0028	557	12	552	19	524	100	557	12	6.29771	-0.905797
	NM5_43	-	-	-	0.752	0.039	0.0905	0.002	0.084376	0.0606	0.0032	558	12	569	23	580	110	558	12	-3.7931	1.93322
	NM5_81	-	-	-	0.738	0.02	0.0905	0.002	0.39426	0.0589	0.0016	559	12	559	12	543	59	559	12	2.94659	0
	NM5_25	-	-	-	0.727	0.026	0.0911	0.002	0.068954	0.0581	0.0022	561	12	551	15	486	85	561	12	15.4321	-1.81488
	NM5_65	-	-	-	0.742	0.023	0.0915	0.0019	0.20789	0.059	0.0019	564	11	561	14	524	72	564	11	7.63359	-0.534759
	NM5_36	-	-	-	0.745	0.018	0.0918	0.0015	0.42052	0.0586	0.0012	565.8	8.6	563.8	10	538	48	565.8	8.6	5.16729	-0.354736
	NM5_98	-	-	-	0.757	0.023	0.0926	0.0016	0.00053093	0.0595	0.0019	570.5	9.3	570	13	541	73	570.5	9.3	5.45287	-0.0877193
	NM5_8	-	-	-	0.779	0.038	0.0936	0.0019	0.01929	0.06	0.0031	576	11	579	22	540	110	576	11	6.66667	0.518135
	NM5_82	-	-	-	0.767	0.024	0.094	0.0024	0.51567	0.0594	0.0017	579	14	579	14	557	62	579	14	3.94973	0
	NM5_20	-	-	-	0.797	0.016	0.0958	0.0016	0.49881	0.06044	0.0011	589.6	9.4	593.9	9.2	606	42	589.6	9.4	-2.70627	0.724028
	NM5_88	-	-	-	0.78	0.022	0.0961	0.002	0.29571	0.0595	0.0018	591	12	583	12	556	64	591	12	6.29496	-1.37221
	NM5_42	-	-	-	0.783	0.017	0.0961	0.0019	0.52141	0.0592	0.0012	591.6	11	587.2	9.7	557	46	591.6	11	6.21185	-0.749319
	NM5_96	-	-	-	0.795	0.016	0.09613	0.0014	0.32655	0.0598	0.0012	591.6	8.2	594.2	9.6	587	45	591.6	8.2	0.783646	0.437563
	NM5_45	-	-	-	0.79	0.018	0.0963	0.0019	0.48729	0.0594	0.0012	592.6	11	590.2	10	570	45	592.6	11	3.96491	-0.406642
	NM5_67	-	-	-	0.825	0.031	0.097	0.003	0.53593	0.0613	0.0021	596	18	609	17	629	74	596	18	-5.24642	2.13465
	NM5_10	-	-	-	0.798	0.016	0.0972	0.0015	0.14285	0.0597	0.0013	597.9	8.6	595	9.2	574	49	597.9	8.6	4.16376	-0.487395
	NM5_62	-	-	-	0.834	0.034	0.0987	0.0026	0.47763	0.0616	0.0024	607	15	611	19	602	82	607	15	0.830565	0.654664
	NM5_44	-	-	-	0.82	0.017	0.0993	0.0016	0.39501	0.0598	0.0012	610.3	9.3	607.2	9.6	583	44	610.3	9.3	4.68268	-0.51054
	NM5_23	-	-	-	0.84	0.031	0.0998	0.0026	0.71911	0.0609	0.0016	613	15	615	17	607	59	613	15	0.988468	0.325203
	NM5_59	-	-	-	0.865	0.038	0.1034	0.0025	0.25607	0.0605	0.0026	634	14	627	20	577	94	634	14	9.87868	-1.11643
	NM5_93	-	-	-	0.92	0.028	0.1081	0.0028	0.78788	0.0614	0.0013	664	15	660	15	642	46	664	15	3.42679	-0.606061
	NM5_55	-	-	-	1.187	0.03	0.1261	0.0025	0.54436	0.0678	0.0015	765	14	794	14	846	46	765	14	-9.57447	3.65239
	NM5_76	-	-	-	1.188	0.034	0.1261	0.003	0.58715	0.0681	0.0016	765	17	792	16	862	50	765	17	-11.2529	3.40909
	NM5_92	-	-	-	1.215	0.032	0.1282	0.0026	0.44758	0.0683	0.0017	777	15	806	15	860	54	777	15	-9.65116	3.59801
	NM5_68	-	-	-	1.198	0.04	0.1299	0.003	0.49885	0.0671	0.0021	787	17	800	20	821	66	787	17	-4.14129	1.625
	NM5_86	-	-	-	1.48	0.13	0.144	0.01	0.89768	0.0713	0.0022	861	56	885	49	933	60	861	56	-7.71704	2.71186
	NM5_79	-	-	-	1.364	0.044	0.1431	0.0034	0.24123	0.0692	0.0023	862	19	870	19	868	73	862	19	-0.691244	0.91954
	NM5_41	-	-	-	1.349	0.043	0.1441	0.0029	0.59103	0.0681	0.0018	868	16	863	19	857	56	868	16	1.28355	-0.579374
	NM5_14	-	-	-	1.454	0.097	0.1485	0.0074	0.91113	0.0692	0.0022	888	42	885	43	861	68	888	42	3.13589	-0.338983
	NM5_73	-	-	-	1.464	0.079	0.1495	0.0059	0.8243	0.07	0.0024	895	33	898	35	890	73	895	33	0.561798	0.334076
	NM5_49	-	-	-	1.419	0.037	0.1494	0.0029	0.54922	0.0683	0.0016	897	16	895	15	866	47	897	16	3.57968	-0.223464
	NM5_94	-	-	-	1.53	0.07	0.1558	0.0037	0.2748	0.0712	0.0032	933	21	937	29	920	100	933	21	1.41304	0.426894
	NM5_16	-	-	-	1.562	0.06	0.1587	0.0051	0.8837	0.0712	0.0014	948	29	946	25	950	40	948	29	-0.210526	-0.211416
	NM5_31	-	-	-	1.567	0.052	0.1609	0.0038	0.65907	0.0705	0.0018	961	21	952	21	925	51	961	21	3.89189	-0.945378
	NM5_29	-	-	-	1.589	0.041	0.1614	0.0034	0.71058	0.0712	0.0014	964	19	964	16	953	42	964	19	1.15425	0
	NM5_85	-	-	-	1.64	0.039	0.1638	0.0035	0.29918	0.0723	0.002	977	19	983	15	978	53	977	19	-0.102249	0.610376
	NM5_28	-	-	-	1.553	0.034	0.1532	0.0026	0.4125	0.0734	0.0016	919	15	950	14	1015	45	1015	45	-9.45813	3.26316
	NM5_50	-	-	-	1.818	0.067	0.1775	0.0054	0.85397	0.0736	0.0015	1052	29	1044	25	1023	43	1023	43	2.8348	-0.766284
	NM5_91	-	-	-	1.758	0.042	0.1745	0.0039	0.65119	0.0727	0.0015	1036	21	1027	16	998	41	1036	21	3.80762	-0.876339
	NM5_84	-	-	-	1.811	0.046	0.1752	0.0038	0.61351	0.0748	0.0017	1040	21	1047	17	1050	44	1050	44	-0.952381	0.668577
	NM5_57	-	-	-	1.893	0.05	0.1812	0.0033	0.36639	0.0759	0.002	1073	18	1077	18	1066	53	1066	53	0.65666	0.371402
	NM5_99	-	-	-	2.08	0.077	0.1921	0.0058	0.85816	0.078	0.0017	1131	31	1133	26	1138	42	1138	42	-0.615114	0.176523
	NM5_64	-	-	-	2.985	0.073	0.2435	0.0048	0.46167	0.0887	0.002	1404	25	1399	19	1380	45	1380	45	1.73913	-0.357398
	NM5_2	-	-	-	3.774	0.079	0.2787	0.0043	0.30647	0.0983	0.002	1584	21	1584	17	1584	38	1584	21	0	0
	NM5_37	-	-	-	3.84	0.12	0.2809	0.0076	0.74237	0.0993	0.0021	1593	38	1594	24	1597	40	1597	40	-0.25047	0.0627353
	NM5_22	-	-	-	4.431	0.094	0.3074	0.0055	0.79029	0.1044	0.0016	1727	27	1714	18	1699	27	1699	27	1.64803	-0.75846
	NM5_17	-	-	-	6.164	0.1	0.3554	0.0059	0.72657	0.1249	0.0017	1959	28	1997	15	2027	25	2027	25	-3.35471	1.90285
	NM5_46	-	-	-	8.44	0.15	0.4219	0.0072	0.73045	0.1446	0.0022	2271	34	2277	16	2279	26	2279	26	-0.351031	0.263505
	NM5_56	-	-	-	13.05	0.25	0.4982	0.0096	0.56798	0.1897	0.0035	2604	41	2681	18	2734	30	2734	30	-4.75494	2.87206
	NM5_51	-	-	-	12.96	0.4	0.482	0.013	0.89186	0.1944	0.0033	2535	56	2673	30	2776	28	2776	28	-8.68156	5.16274
	U-Pb LA-ICPMS detrital zircon data
	Sample Location: Stawallton Station, Queensland (sample name: DINO_TRACK; Stawellton, Queensland)
	Formation: Blantyre Sandstone / Eulo Queen Group
	Sample #	Th (PPM)	U (PPM)	Th/U	Pb207	±	Pb206	±	Error	Pb207	±	Pb206	± 2σ	Pb207	± 2σ	Pb207	± 2σ	Preferred	± 2σ	Pb-Pb/U-Pb Discordance (%)	U-Pb/U-Pb Discordance (%)
	DINO_TRACK				/U235	2σ	/U238	2σ	Corr.	/Pb206	2σ	/U238 (Ma)	(Ma)	/U235	(Ma)	/Pb206	(Ma)	Age	(Ma)
	DT_115	413	200.6	0.476	0.14	0.0083	0.02084	0.00042	0.033812	0.0491	0.003	133	2.7	132.2	7.4	90	120	133	2.7	-47.7778	-0.605144
	DT_114	469	205	0.4275	0.1454	0.0087	0.02104	0.00047	0.038314	0.0503	0.0031	134.2	3	136.9	7.7	150	130	134.2	3	10.5333	1.97224
	DT_112	330	326	1.081	0.1761	0.0073	0.02539	0.00051	0.099325	0.0506	0.0022	161.6	3.2	164.1	6.3	184	90	161.6	3.2	12.1739	1.52346
	DINO_TRACK_18	1158	619.1	0.525	0.17	0.0061	0.02555	0.00048	0.25633	0.0481	0.0016	162.6	3	159.1	5.3	96	73	162.6	3	-69.375	-2.19987
	DT_109	188.2	191.8	1.017	0.1793	0.0084	0.02593	0.00055	0.041013	0.0511	0.0026	165	3.5	167.6	7.4	180	100	165	3.5	8.33333	1.55131
	DT_39	299	146.6	0.4954	0.175	0.011	0.026	0.00056	0.20456	0.0485	0.0029	165.4	3.5	162.6	9.4	80	120	165.4	3.5	-106.75	-1.72202
	DT_96	320	553	1.757	0.1817	0.0058	0.02601	0.00035	0.19211	0.0503	0.0016	165.5	2.2	169.1	5	194	69	165.5	2.2	14.6907	2.12892
	DT_89	129.4	91.4	0.706	0.18	0.014	0.02608	0.00067	0.12147	0.0496	0.0038	165.9	4.2	165	12	100	150	165.9	4.2	-65.9	-0.545455
	DT_106	201	251	1.228	0.1834	0.009	0.02646	0.00044	-0.024188	0.0506	0.0026	168.3	2.8	170.1	7.7	160	110	168.3	2.8	-5.1875	1.0582
	DINO_TRACK_22	379	152	0.4003	0.189	0.013	0.02657	0.00069	0.30566	0.0516	0.0034	169	4.3	174	11	190	130	169	4.3	11.0526	2.87356
	DT_75	121.1	105.2	0.858	0.188	0.014	0.02659	0.0007	0.10668	0.0514	0.0039	169.1	4.4	173	12	170	150	169.1	4.4	0.529412	2.25434
	DT_17	169.7	90.37	0.5317	0.197	0.016	0.02774	0.00077	-0.068552	0.0509	0.0044	176.4	4.8	181	14	180	170	176.4	4.8	2	2.54144
	DT_2	37.34	33.78	0.91	0.2	0.027	0.029	0.0012	0.074095	0.0479	0.0063	183.9	7.8	183	23	60	250	183.9	7.8	-206.5	-0.491803
	DT_67	833	255	0.376	0.225	0.01	0.02985	0.00052	0.10987	0.0546	0.0024	189.6	3.3	205	8.4	344	96	189.6	3.3	44.8837	7.5122
	DT_48	545	366	0.675	0.2093	0.0085	0.03003	0.00052	0.36561	0.0506	0.002	190.7	3.2	193.5	7.4	195	83	190.7	3.2	2.20513	1.44703
	DT_36	212.8	138.9	0.661	0.204	0.011	0.03024	0.00063	0.062151	0.0494	0.0029	192	3.9	188.7	9.9	120	120	192	3.9	-60	-1.74881
	DT_110	370.8	870	2.317	0.2228	0.0073	0.03187	0.00067	0.29345	0.0508	0.0016	202.2	4.2	204	6	226	73	202.2	4.2	10.531	0.882353
	DT_97	353.9	203.9	0.564	0.248	0.0095	0.03595	0.00081	0.36343	0.0505	0.0018	227.6	5	225	7.9	187	76	227.6	5	-21.7112	-1.15556
	DINO_TRACK_21	365.7	133	0.3611	0.268	0.016	0.03803	0.00082	0.20302	0.0512	0.003	240.5	5.1	239	12	180	110	240.5	5.1	-33.6111	-0.627615
	DINO_TRACK_1	357	153.9	0.457	0.268	0.015	0.03881	0.00087	0.096238	0.0504	0.0027	245.4	5.4	239	12	170	120	245.4	5.4	-44.3529	-2.67782
	DINO_TRACK_15	192	140.8	0.7188	0.287	0.015	0.03902	0.00088	0.18515	0.0535	0.0027	246.7	5.4	256	12	300	110	246.7	5.4	17.7667	3.63281
	DT_102	318	248.7	0.8	0.295	0.011	0.04216	0.00075	0.16765	0.0506	0.0019	266.2	4.6	261.1	8.4	188	80	266.2	4.6	-41.5957	-1.95327
	DT_44	294.1	141.6	0.475	0.319	0.016	0.04389	0.00088	-0.0087847	0.0532	0.0028	276.9	5.4	282	13	290	110	276.9	5.4	4.51724	1.80851
	DT_16	101	121.2	1.202	0.316	0.014	0.04487	0.00087	0.12389	0.0508	0.0022	282.9	5.4	277	11	218	94	282.9	5.4	-29.7706	-2.12996
	DT_104	176.5	142	0.808	0.32	0.014	0.0457	0.001	-0.049214	0.051	0.0026	287.7	6.4	280	11	210	110	287.7	6.4	-37	-2.75
	DT_105	167.8	211.3	1.237	0.353	0.013	0.04886	0.00082	0.067691	0.0527	0.002	307.4	5	307.1	9.4	273	82	307.4	5	-12.6007	-0.097688
	DT_34	643.4	450.2	0.6948	0.3911	0.0094	0.0534	0.00071	0.13387	0.053	0.0013	335.3	4.3	334.5	6.9	311	54	335.3	4.3	-7.8135	-0.239163
	DT_10	268.8	163.3	0.605	0.395	0.015	0.05351	0.00098	0.12887	0.0539	0.0022	335.9	6	339	11	323	86	335.9	6	-3.99381	0.914454
	DINO_TRACK_24	340	227	0.669	0.408	0.015	0.05415	0.00087	0.18377	0.0547	0.0019	339.9	5.3	347.6	10	356	76	339.9	5.3	4.52247	2.21519
	DINO_TRACK_27	424.6	297.3	0.697	0.438	0.015	0.0587	0.0011	0.44238	0.0542	0.0017	367.6	6.8	367.1	11	355	65	367.6	6.8	-3.5493	-0.136203
	DT_45	188.7	136.7	0.7228	0.456	0.015	0.0602	0.0011	0.062314	0.0553	0.002	376.8	6.4	381	11	383	79	376.8	6.4	1.6188	1.10236
	DT_42	168.2	358.3	2.227	0.52	0.012	0.0684	0.00089	0.37424	0.0552	0.0012	426.5	5.4	424.4	8.2	398	48	426.5	5.4	-7.1608	-0.494816
	DT_101	149.7	42.63	0.2828	0.639	0.04	0.0795	0.0019	0.1179	0.0588	0.0039	493	12	493	25	450	140	493	12	-9.55556	0
	DT_99	131.8	106.8	0.814	0.638	0.028	0.0799	0.0014	0.090923	0.0577	0.0025	495.2	8.5	500	17	489	93	495.2	8.5	-1.26789	0.96
	DT_80	111.6	138.8	1.264	0.627	0.022	0.0801	0.0013	0.17035	0.0567	0.002	496.5	7.6	491	14	438	76	496.5	7.6	-13.3562	-1.12016
	DT_4	214	181.8	0.907	0.638	0.02	0.0801	0.0011	0.18963	0.0579	0.0017	496.6	6.6	499	12	496	64	496.6	6.6	-0.120968	0.480962
	DINO_TRACK_29	301	273.2	0.97	0.645	0.018	0.0805	0.0014	0.28078	0.058	0.0015	499.1	8.3	503.8	11	516	59	499.1	8.3	3.27519	0.93291
	DT_21	557	646	1.159	0.827	0.023	0.0845	0.0017	0.24282	0.0719	0.0022	522.8	9.9	610	12	944	60	522.8	9.9	44.6186	14.2951
	DT_113	54.7	166.3	3.033	0.696	0.022	0.0855	0.0014	0.35921	0.0591	0.0018	528.9	8.6	533	13	528	66	528.9	8.6	-0.170455	0.769231
	DINO_TRACK_2	172.8	305.2	1.807	0.702	0.02	0.0857	0.0013	0.22824	0.0596	0.0015	529.7	7.5	539	12	572	56	529.7	7.5	7.3951	1.72542
	DT_87	116.4	104.5	0.919	0.686	0.026	0.0857	0.0016	0.33612	0.0585	0.0022	530.2	9.2	529	16	494	81	530.2	9.2	-7.32794	-0.226843
	DT_5	510	487	0.9506	0.699	0.021	0.0859	0.0016	0.49679	0.059	0.0015	531.1	9.6	537	13	560	55	531.1	9.6	5.16071	1.0987
	DINO_TRACK_7	140.6	156.7	1.087	0.679	0.022	0.0865	0.0014	0.1563	0.0573	0.0019	534.8	8.5	525	14	462	72	534.8	8.5	-15.7576	-1.86667
	DINO_TRACK_20	472	34	0.0755	0.714	0.05	0.089	0.0025	0.018001	0.0595	0.0043	549	15	542	31	450	150	549	15	-22	-1.29151
	DT_43	29.49	35.81	1.216	0.741	0.045	0.0893	0.002	0.11558	0.0611	0.0038	551	12	558	27	520	130	551	12	-5.96154	1.25448
	DT_32	204.8	461	2.194	0.787	0.016	0.09027	0.0011	0.38978	0.063	0.0011	557.1	6.6	588.1	9	705	37	557.1	6.6	20.9787	5.27121
	DT_83	90.5	90.6	1.037	0.858	0.072	0.0906	0.0021	0.7611	0.0681	0.0044	559	12	613	30	760	100	559	12	26.4474	8.80914
	DT_30	9.8	30.55	4.01	0.737	0.055	0.091	0.0022	0.050854	0.058	0.0042	563	13	549	33	430	150	563	13	-30.9302	-2.55009
	DT_11	156.5	48.8	0.312	0.738	0.039	0.0926	0.0019	0.0784	0.0577	0.0031	571	11	554	23	440	120	571	11	-29.7727	-3.06859
	DINO_TRACK_10	142.9	39.7	0.2742	0.717	0.043	0.0927	0.0021	0.13355	0.0567	0.0034	571	13	542	26	380	120	571	13	-50.2632	-5.35055
	DT_68	109	52.42	0.4769	0.767	0.036	0.0929	0.0018	0.10081	0.0603	0.0029	572.5	10	571	21	540	110	572.5	10	-6.01852	-0.262697
	DINO_TRACK_23	268.3	89.8	0.3314	0.766	0.032	0.0942	0.0021	0.27344	0.0587	0.0024	580	13	573	19	509	86	580	13	-13.9489	-1.22164
	DT_33	369.6	129.1	0.3477	0.801	0.023	0.0954	0.0014	0.16818	0.061	0.0018	587.5	8.2	595	13	597	63	587.5	8.2	1.59129	1.2605
	DINO_TRACK_5	294.5	110.3	0.3667	0.797	0.029	0.097	0.0017	0.11884	0.06	0.0022	596.4	10	594	16	560	77	596.4	10	-6.5	-0.40404
	DT_9	122.5	519.2	4.244	0.803	0.012	0.09699	0.0012	0.35821	0.06015	0.00089	596.7	6.8	598.7	6.8	602	32	596.7	6.8	0.880399	0.334057
	DT_103	60.8	18.86	0.3079	0.752	0.063	0.0975	0.0029	-0.018359	0.0575	0.0053	599	17	553	38	310	180	599	17	-93.2258	-8.31826
	DT_15	255	245	0.934	0.816	0.02	0.0978	0.0015	0.35638	0.0604	0.0014	601.2	8.8	604	11	598	51	601.2	8.8	-0.535117	0.463576
	DINO_TRACK_16	87.9	79.5	0.893	0.771	0.029	0.0983	0.002	0.13991	0.0578	0.0024	604	12	579	17	463	85	604	12	-30.4536	-4.31779
	DINO_TRACK_26	342.5	646	1.881	0.815	0.019	0.0983	0.0013	0.56462	0.06004	0.0011	604.3	7.8	604.1	11	593	39	604.3	7.8	-1.90556	-0.0331071
	DT_71	186.4	116.7	0.6207	0.801	0.028	0.0986	0.0018	0.28567	0.0591	0.002	606	10	594	16	525	75	606	10	-15.4286	-2.0202
	DT_107	167.4	249.1	1.5	0.811	0.022	0.0987	0.0016	0.33651	0.0593	0.0016	606.8	9.3	601	13	561	58	606.8	9.3	-8.16399	-0.965058
	DT_50	76.3	251.5	3.282	0.896	0.025	0.1005	0.002	0.57235	0.065	0.0015	617	12	649	13	757	48	617	12	18.4941	4.93066
	DT_3	411	833	2.13	0.946	0.016	0.1026	0.0015	0.45015	0.06711	0.00098	629.5	8.6	675.1	8.4	831	30	629.5	8.6	24.2479	6.75455
	DINO_TRACK_9	63.4	79.7	1.67	0.872	0.038	0.1032	0.0024	0.159	0.0616	0.0027	633	14	631	20	599	94	633	14	-5.67613	-0.316957
	DT_53	352	654	1.887	0.915	0.014	0.1073	0.0013	0.35259	0.06185	0.00086	657.2	7.5	658.9	7.2	663	30	657.2	7.5	0.874811	0.258006
	DT_51	43.4	265.7	6.68	1.002	0.045	0.1091	0.0035	0.89384	0.0659	0.0015	667	21	697	23	786	49	667	21	15.1399	4.30416
	DT_92	53	170.1	3.36	0.948	0.046	0.1095	0.0034	0.81203	0.0622	0.0019	669	19	669	24	660	62	669	19	-1.36364	0
	DT_8	71	108.4	1.519	0.971	0.035	0.1102	0.0019	0.1897	0.0641	0.0024	674	11	685	18	713	78	674	11	5.46985	1.60584
	DT_61	379.5	380.3	0.984	0.929	0.019	0.1104	0.0015	0.34549	0.0611	0.0012	674.7	8.5	666	9.8	633	40	674.7	8.5	-6.58768	-1.30631
	DINO_TRACK_12	29.8	55.6	3.14	1.078	0.073	0.1199	0.0038	0.32713	0.0653	0.0043	729	22	729	38	700	150	729	22	-4.14286	0
	DT_28	366	351	0.984	1.048	0.02	0.1205	0.0014	0.33064	0.0629	0.0011	733.5	8	726.7	10	698	37	733.5	8	-5.08596	-0.935737
	DINO_TRACK_25	165.8	189.6	1.13	1.04	0.028	0.1217	0.0018	0.33807	0.0622	0.0015	740	11	722	14	654	53	740	11	-13.1498	-2.49307
	DT_95	246.4	243.9	0.991	1.356	0.027	0.1428	0.0018	0.43344	0.0687	0.0012	860.3	10	868	11	881	35	860.3	10	2.3496	0.887097
	DT_111	90	95	1.032	1.71	0.048	0.17	0.0031	0.21232	0.0733	0.0021	1014	17	1010	18	994	59	994	59	-2.01207	-0.39604
	DINO_TRACK_14	421	97.9	0.2336	1.752	0.058	0.171	0.0029	0.25124	0.0747	0.0024	1017	16	1026	23	1022	66	1022	66	0.489237	0.877193
	DT_76	109.7	35.4	0.3247	2.093	0.078	0.2012	0.004	0.20225	0.0758	0.0029	1181	21	1137	26	1029	80	1029	80	-14.7716	-3.86983
	DT_70	246.7	538	2.154	1.771	0.026	0.1735	0.0021	0.57106	0.07398	0.00087	1031.2	11	1033.6	9.6	1034	24	1034	24	0.270793	0.232198
	DT_6	71.9	432	7.36	1.798	0.041	0.1749	0.0033	0.81509	0.07424	0.00086	1038	18	1042	15	1048	25	1048	25	0.954198	0.383877
	DT_100	98.6	147.8	1.492	1.744	0.036	0.1695	0.0031	0.35924	0.0747	0.0015	1009	17	1023	13	1049	41	1049	41	3.81316	1.36852
	DT_40	158	123	0.7742	1.87	0.043	0.1813	0.0025	0.21802	0.0749	0.0017	1074	13	1067	15	1051	45	1051	45	-2.18839	-0.656045
	DT_66	206.4	240	1.153	1.896	0.039	0.1806	0.0028	0.53019	0.0761	0.0013	1070	15	1077	13	1086	35	1086	35	1.4733	0.649954
	DINO_TRACK_30	137.2	52.2	0.3819	2.059	0.081	0.192	0.0045	0.37575	0.0782	0.0028	1131	24	1126	27	1108	73	1108	73	-2.07581	-0.44405
	DT_29	148.3	43.6	0.2907	2.125	0.069	0.1988	0.0033	0.22015	0.0777	0.0025	1168	18	1153	22	1109	65	1109	65	-5.32011	-1.30095
	DT_78	147.5	443.9	3	1.915	0.03	0.1805	0.0024	0.59296	0.07677	0.00091	1069	13	1085	10	1109	24	1109	24	3.60685	1.47465
	DT_14	666	113.6	0.1705	2.13	0.049	0.1988	0.0031	0.12578	0.0779	0.0019	1168	17	1156	16	1122	50	1122	50	-4.09982	-1.03806
	DT_47	153	105.6	0.6782	2.103	0.047	0.1964	0.0028	0.30558	0.078	0.0016	1155	15	1146	16	1128	42	1128	42	-2.39362	-0.78534
	DT_12	64.5	16.69	0.2566	2.22	0.11	0.2011	0.0047	0.14515	0.0809	0.0042	1180	25	1177	35	1130	110	1130	110	-4.42478	-0.254885
	DT_74	384	211	0.5597	2.091	0.04	0.1949	0.0026	0.34588	0.0779	0.0014	1147	14	1145	13	1130	35	1130	35	-1.50442	-0.174672
	DT_55	143.9	61.4	0.4311	2.075	0.06	0.1931	0.0031	0.20234	0.0782	0.0023	1138	17	1137	19	1140	54	1140	54	0.175439	-0.0879507
	DINO_TRACK_8	226.1	95.1	0.4109	2.117	0.063	0.1947	0.0032	0.19764	0.0793	0.0022	1146	17	1150	20	1150	58	1150	58	0.347826	0.347826
	DT_19	315.2	163.5	0.525	2.18	0.045	0.2019	0.003	0.47096	0.0784	0.0014	1185	16	1175	14	1151	34	1151	34	-2.95395	-0.851064
	DT_54	329	158.6	0.523	2.078	0.037	0.1925	0.0027	0.39554	0.0784	0.0012	1134	14	1139	12	1151	30	1151	30	1.47698	0.438982
	DT_13	350.9	180.8	0.5103	2.157	0.038	0.1978	0.0024	0.32145	0.0788	0.0013	1163	13	1165	12	1160	33	1160	33	-0.258621	0.171674
	DT_22	113.1	50.71	0.4455	2.186	0.063	0.2009	0.0035	0.15653	0.0795	0.0024	1179	19	1174	20	1162	62	1162	62	-1.46299	-0.425894
	DT_85	34.6	273.3	8.03	2.153	0.035	0.1958	0.0025	0.47496	0.08	0.0012	1152	13	1166	12	1186	29	1186	29	2.86678	1.20069
	DT_84	168.4	111.9	0.666	3.093	0.065	0.2479	0.0039	0.42067	0.0906	0.0017	1427	20	1427	16	1429	37	1429	37	0.139958	0
	DT_90	129.7	433	3.44	3.093	0.055	0.2479	0.0037	0.58307	0.0907	0.0013	1427	19	1430	13	1432	27	1432	27	0.349162	0.20979
	DT_73	205.5	190.9	0.941	3.325	0.058	0.2611	0.0035	0.61153	0.0925	0.0012	1495	18	1486	13	1474	26	1474	26	-1.42469	-0.605653
	DT_98	793	346	0.4367	3.406	0.054	0.2642	0.0032	0.61583	0.0932	0.0011	1511	16	1504	12	1486	22	1486	22	-1.68237	-0.465426
	DT_77	218	249	1.213	3.585	0.052	0.2738	0.0038	0.50051	0.0953	0.0012	1559	19	1546	12	1526	25	1526	25	-2.16252	-0.84088
	DT_52	105.9	61.7	0.575	3.513	0.077	0.2662	0.0042	0.22763	0.096	0.0022	1521	21	1527	17	1537	42	1537	42	1.04099	0.392927
	DT_60	502.4	196.1	0.3858	3.747	0.063	0.2802	0.0043	0.46741	0.0972	0.0015	1591	21	1582	14	1564	30	1564	30	-1.72634	-0.5689
	DT_20	235.6	163.8	0.681	3.708	0.056	0.276	0.0035	0.40529	0.0976	0.0013	1570	18	1571	12	1570	26	1570	26	0	0.0636537
	DT_35	227	136	0.5954	3.926	0.064	0.287	0.0035	0.37936	0.0991	0.0014	1626	18	1617	13	1602	28	1602	28	-1.49813	-0.556586
	DT_63	1520	455	0.2929	4.1	0.076	0.294	0.0059	0.75977	0.1014	0.0011	1660	30	1651	15	1646	20	1646	20	-0.850547	-0.545124
	DT_7	255.4	204.8	0.807	4.076	0.064	0.2888	0.0036	0.53505	0.102	0.0012	1635	18	1647	13	1658	23	1658	23	1.38721	0.728597
	DT_49	127	203	1.574	4.323	0.064	0.3014	0.0037	0.46612	0.1043	0.0013	1698	18	1697	13	1698	24	1698	24	0	-0.0589275
	DT_1	152.1	187.9	1.267	4.694	0.064	0.3191	0.0036	0.55139	0.1067	0.0011	1785	17	1765	11	1739	19	1739	19	-2.6452	-1.13314
	DT_86	237.8	219.6	0.928	4.685	0.061	0.3164	0.0038	0.48404	0.1074	0.0012	1772	19	1763.2	11	1750	20	1750	20	-1.25714	-0.499093
	DINO_TRACK_19	302	212	0.722	4.728	0.1	0.3172	0.0057	0.62451	0.1076	0.0017	1775	28	1770	18	1757	31	1757	31	-1.02447	-0.282486
	DT_24	150.6	321	2.23	4.96	0.11	0.3092	0.0044	0.66513	0.1158	0.0018	1736	22	1809	19	1884	28	1884	28	7.85563	4.03538
	DT_27	100.9	90.8	0.88	6.26	0.11	0.3687	0.0047	0.453	0.1232	0.0019	2025	23	2011	16	1994	28	1994	28	-1.55466	-0.696171
	DT_64	914	688	0.783	6.004	0.084	0.334	0.0049	0.70274	0.1303	0.0013	1856	24	1975	12	2097	18	2097	18	11.4926	6.02532
	DT_31	9	28.4	6.17	7.61	0.7	0.352	0.025	0.95317	0.1412	0.0083	1910	130	1990	130	2100	140	2100	140	9.04762	4.0201
	DT_46	186	157	0.899	12.22	0.21	0.4832	0.0076	0.76737	0.1841	0.002	2539	33	2618	17	2688	17	2688	17	5.54315	3.01757
	DT_38	211	250	1.187	13.46	0.15	0.5258	0.0065	0.71559	0.1857	0.0014	2722	28	2711.6	10	2702	13	2702	13	-0.740192	-0.383537
	DT_56	142.9	881	5.95	11.12	0.22	0.4317	0.0077	0.93773	0.1864	0.0013	2311	35	2534	18	2709	11	2709	11	14.6918	8.80032
	DINO_TRACK_28	38.2	55.6	1.441	12.77	0.28	0.4702	0.0082	0.45872	0.1977	0.0038	2486	37	2662	21	2798	31	2798	31	11.1508	6.61157
	DT_58	88	172.2	1.93	14.43	0.17	0.5257	0.0066	0.62302	0.1991	0.0019	2725	29	2777.1	11	2815	16	2815	16	3.19716	1.87606
	U-Pb LA-ICPMS detrital zircon data
	Sample Location: Lakefield 1 Well, Queensland (sample name: 081018-6; Lakefield, Queensland)
	Formation: Gilbert River Formation
	Sample #	Th (PPM)	U (PPM)	Th/U	Pb207	±	Pb206	±	Error	Pb207	±	Pb206	± 2σ	Pb207	± 2σ	Pb207	± 2σ	Preferred	± 2σ	Pb-Pb/U-Pb Discordance (%)	U-Pb/U-Pb Discordance (%)
	081018-6				/U235	2σ	/U238	2σ	Corr.	/Pb206	2σ	/U238 (Ma)	(Ma)	/U235	(Ma)	/Pb206	(Ma)	Age	(Ma)
	081018_6_70	144.2	105	0.722	0.138	0.011	0.02088	0.0006	0.033521	0.048	0.0038	133.2	3.8	130.7	9.9	50	150	133.2	3.8	-166.4	-1.91278
	081018_6_48	80.4	81.1	0.983	0.172	0.016	0.02428	0.0008	-0.067287	0.053	0.0052	154.6	5	159	14	170	190	154.6	5	9.05882	2.7673
	081018_6_103	319.3	201.3	0.6349	0.1641	0.0086	0.02451	0.00049	0.0035619	0.0489	0.0026	156.1	3.1	153.5	7.5	100	110	156.1	3.1	-56.1	-1.69381
	081018_6_74	946	413.4	0.4387	0.1756	0.0063	0.02564	0.00046	0.17528	0.0493	0.0017	163.2	2.9	163.9	5.4	149	73	163.2	2.9	-9.5302	0.42709
	081018_6_78	1080	339	0.3185	0.1833	0.0075	0.02667	0.00052	0.026253	0.0499	0.0021	169.7	3.2	170.3	6.4	164	89	169.7	3.2	-3.47561	0.352319
	081018_6_71	386.9	195.9	0.5054	0.183	0.0091	0.0271	0.00056	0.087468	0.049	0.0024	172.3	3.5	169.8	7.7	110	100	172.3	3.5	-56.6364	-1.47232
	081018_6_69	423	257	0.5997	0.1902	0.0099	0.02742	0.00054	0.098223	0.0504	0.0026	174.4	3.4	176.8	8.2	170	100	174.4	3.4	-2.58824	1.35747
	081018_6_50	460	215.7	0.4612	0.1846	0.0089	0.02749	0.00058	0.24276	0.0488	0.0023	174.8	3.6	172.1	7.8	104	96	174.8	3.6	-68.0769	-1.56886
	081018_6_14	1332	552.7	0.412	0.2095	0.0087	0.02752	0.00059	0.37905	0.055	0.0021	175	3.7	192.6	7.3	375	83	175	3.7	53.3333	9.13811
	081018_6_84	213.5	151.2	0.7029	0.204	0.012	0.0281	0.00068	-0.0427	0.0523	0.0031	178.6	4.3	187.1	9.7	250	120	178.6	4.3	28.56	4.54303
	081018_6_26	365	274.2	0.74	0.1989	0.0079	0.02852	0.00058	0.25681	0.0506	0.0019	181.2	3.6	183.6	6.7	191	81	181.2	3.6	5.13089	1.30719
	081018_6_95	151.8	92.5	0.615	0.195	0.012	0.02858	0.00071	0.083424	0.0499	0.0032	181.6	4.5	179	10	130	130	181.6	4.5	-39.6923	-1.45251
	081018_6_97	186.1	210.7	1.145	0.1975	0.0088	0.02869	0.00059	0.14125	0.0502	0.0023	182.3	3.7	182.2	7.4	163	92	182.3	3.7	-11.8405	-0.0548847
	081018_6_66	111.6	87.23	0.783	0.206	0.014	0.02923	0.00079	0.11762	0.0509	0.0035	185.7	5	188	12	160	140	185.7	5	-16.0625	1.2234
	081018_6_59	128.4	119.6	0.915	0.204	0.013	0.02996	0.00078	0.31487	0.0488	0.0029	190.2	4.9	187	11	100	120	190.2	4.9	-90.2	-1.71123
	081018_6_80	77.3	72.5	0.943	0.2	0.018	0.03008	0.00084	0.042372	0.0488	0.0044	191	5.3	182	15	20	160	191	5.3	-855	-4.94505
	081018_6_10	268.3	177.2	0.646	0.2146	0.0093	0.03076	0.00066	0.085113	0.051	0.0024	195.3	4.1	196.5	7.8	185	94	195.3	4.1	-5.56757	0.610687
	081018_6_73	427.8	203.4	0.4785	0.2117	0.0097	0.03077	0.00064	0.015848	0.0502	0.0024	195.3	4	194	8.1	157	97	195.3	4	-24.3949	-0.670103
	081018_6_94	220	248	1.151	0.2421	0.0091	0.03362	0.0006	-0.049123	0.0524	0.0021	213.1	3.7	219.5	7.4	259	85	213.1	3.7	17.722	2.91572
	081018_6_45	502	396	0.786	0.2468	0.0085	0.03497	0.00068	0.16959	0.0505	0.0017	221.6	4.2	224.2	6.7	218	73	221.6	4.2	-1.65138	1.15968
	081018_6_52	205	170	0.825	0.264	0.012	0.03663	0.00087	0.15317	0.0528	0.0024	231.9	5.4	237.6	9.7	264	99	231.9	5.4	12.1591	2.39899
	081018_6_17	300.8	215.9	0.723	0.2556	0.0098	0.0369	0.00075	0.26059	0.0495	0.0018	233.6	4.6	230.3	7.8	162	78	233.6	4.6	-44.1975	-1.43291
	081018_6_102	83.2	72.8	0.881	0.268	0.017	0.03811	0.001	0.1109	0.0512	0.0032	241	6.2	238	14	180	130	241	6.2	-33.8889	-1.2605
	081018_6_82	563.7	559.6	0.9868	0.2751	0.0078	0.03916	0.00065	0.15174	0.0508	0.0014	247.6	4	247	6	225	62	247.6	4	-10.0444	-0.242915
	081018_6_38	460	402	0.883	0.279	0.01	0.03956	0.00081	0.20548	0.0508	0.0018	250	5	249	8.1	206	77	250	5	-21.3592	-0.401606
	081018_6_88	280.9	230	0.8	0.281	0.011	0.03988	0.00071	0.19793	0.0511	0.002	252	4.4	250.5	8.9	217	84	252	4.4	-16.129	-0.598802
	081018_6_43	272.9	302.9	1.107	0.2895	0.011	0.04002	0.00083	0.27344	0.0523	0.0019	252.9	5.1	257.2	8.4	267	76	252.9	5.1	5.2809	1.67185
	081018_6_56	155.2	119.1	0.803	0.283	0.014	0.04003	0.00091	0.10352	0.0514	0.0027	252.9	5.6	253	12	210	110	252.9	5.6	-20.4286	0.0395257
	081018_6_55	817	590	0.716	0.2896	0.0092	0.04006	0.00078	0.23388	0.0524	0.0016	253.2	4.8	257.7	7.2	278	68	253.2	4.8	8.92086	1.74622
	081018_6_58	136.1	96.4	0.706	0.28	0.016	0.04074	0.00098	-0.081462	0.05	0.003	257.4	6	249	12	140	120	257.4	6	-83.8571	-3.37349
	081018_6_92	244	152.1	0.6207	0.296	0.013	0.04067	0.00084	-0.11237	0.0533	0.0026	257.5	5.3	262	10	277	99	257.5	5.3	7.03971	1.71756
	081018_6_36	406.1	586	1.444	0.2927	0.0079	0.0409	0.00083	0.41726	0.0517	0.0013	258.3	5.2	260.2	6.2	250	55	258.3	5.2	-3.32	0.730208
	081018_6_83	159.5	103.6	0.6411	0.303	0.016	0.04119	0.00086	0.13116	0.0538	0.0029	260.2	5.3	266	13	290	110	260.2	5.3	10.2759	2.18045
	081018_6_99	73.4	157.8	2.216	0.317	0.015	0.04173	0.0008	-0.0049822	0.0554	0.0028	263.5	5	278	12	360	110	263.5	5	26.8056	5.21583
	081018_6_79	140.1	170	1.209	0.286	0.013	0.04208	0.00089	0.073782	0.0495	0.0023	265.7	5.5	254.1	10	137	94	265.7	5.5	-93.9416	-4.56513
	081018_6_75	317	126.8	0.42	0.309	0.016	0.04252	0.00094	0.15776	0.0528	0.0026	268.4	5.8	271	12	270	100	268.4	5.8	0.592593	0.95941
	081018_6_12	238	220.1	0.921	0.3	0.012	0.04264	0.00086	0.11125	0.0507	0.002	269.2	5.3	265.2	9	203	82	269.2	5.3	-32.6108	-1.5083
	081018_6_28	402.3	319	0.779	0.3181	0.01	0.04284	0.00091	0.042262	0.0538	0.0019	270.3	5.6	279.7	7.8	327	75	270.3	5.6	17.3394	3.36074
	081018_6_53	367	222.1	0.596	0.313	0.012	0.04288	0.00091	0.23003	0.0527	0.002	270.6	5.6	275.3	9.1	284	81	270.6	5.6	4.71831	1.70723
	081018_6_98	79.8	54.4	0.6803	0.291	0.022	0.043	0.0012	0.1097	0.0498	0.0039	271.3	7.2	255	18	110	150	271.3	7.2	-146.636	-6.39216
	081018_6_34	272	174.6	0.701	0.316	0.015	0.04316	0.0011	0.10862	0.0533	0.0027	272.3	6.7	277	11	290	110	272.3	6.7	6.10345	1.69675
	081018_6_21	126.5	77.7	0.614	0.331	0.021	0.0433	0.0012	0.054463	0.0557	0.0038	273.1	7.3	288	17	330	140	273.1	7.3	17.2424	5.17361
	081018_6_60	270.3	229	0.837	0.319	0.014	0.04372	0.00095	0.37646	0.0525	0.0021	275.8	5.9	280	11	273	86	275.8	5.9	-1.02564	1.5
	081018_6_81	100	101.6	1.102	0.328	0.026	0.0439	0.0015	-0.1358	0.0552	0.005	276.6	9	285	20	310	180	276.6	9	10.7742	2.94737
	081018_6_5	270	199.5	0.747	0.314	0.013	0.04416	0.00085	-0.01798	0.0514	0.0022	278.5	5.3	275.8	10	230	93	278.5	5.3	-21.087	-0.97897
	081018_6_104	174	200.1	1.156	0.328	0.014	0.04427	0.00078	0.24141	0.0534	0.0021	279.2	4.8	286	11	310	89	279.2	4.8	9.93548	2.37762
	081018_6_96	263	360	1.372	0.325	0.013	0.04433	0.00093	0.18219	0.0533	0.0021	279.6	5.7	284.9	9.7	309	85	279.6	5.7	9.51456	1.8603
	081018_6_7	190	175.3	0.944	0.321	0.013	0.04436	0.00098	0.35659	0.052	0.0019	279.7	6	282.4	10	278	84	279.7	6	-0.611511	0.956091
	081018_6_16	220.1	223.3	0.999	0.335	0.013	0.04441	0.00094	0.076288	0.0549	0.0023	280.1	5.8	292	10	365	92	280.1	5.8	23.2603	4.07534
	081018_6_8	221.6	181.3	0.817	0.328	0.013	0.04446	0.0009	0.20995	0.0534	0.0022	280.4	5.5	286.9	10	299	86	280.4	5.5	6.22074	2.2656
	081018_6_33	300.3	314.3	1.066	0.326	0.011	0.04446	0.00083	0.23411	0.0531	0.0018	280.4	5.1	285.7	8.7	294	72	280.4	5.1	4.62585	1.85509
	081018_6_101	126.7	402.7	3.208	0.3162	0.0093	0.0445	0.00078	0.21158	0.0514	0.0014	280.6	4.8	278.3	7.1	241	62	280.6	4.8	-16.4315	-0.826446
	081018_6_86	1067	1013	0.9458	0.316	0.0076	0.04471	0.00064	0.25075	0.05132	0.0011	281.9	3.9	278.5	5.8	240	48	281.9	3.9	-17.4583	-1.22083
	081018_6_76	740	614	0.828	0.3273	0.0089	0.04474	0.00072	0.26267	0.0531	0.0014	282.1	4.5	287.7	7	318	56	282.1	4.5	11.2893	1.94647
	081018_6_6	241	105.3	0.4408	0.331	0.017	0.04478	0.0011	0.029546	0.0535	0.0028	282.3	6.5	288	13	290	110	282.3	6.5	2.65517	1.97917
	081018_6_67	86.2	95.8	1.119	0.324	0.017	0.0448	0.0011	0.011426	0.0521	0.0027	282.4	7	282	13	250	110	282.4	7	-12.96	-0.141844
	081018_6_41	168.6	172.6	1.025	0.328	0.016	0.04483	0.00097	0.23286	0.053	0.0024	282.7	6	287	12	281	99	282.7	6	-0.604982	1.49826
	081018_6_57	105.2	121	1.113	0.313	0.018	0.0449	0.0012	0.126	0.0508	0.003	282.9	7.1	274	14	180	120	282.9	7.1	-57.1667	-3.24818
	081018_6_37	144.4	141.1	0.971	0.331	0.016	0.04492	0.001	0.13417	0.0537	0.0026	283.2	6.2	288	12	289	100	283.2	6.2	2.00692	1.66667
	081018_6_39	213	212	1.013	0.314	0.014	0.04492	0.001	0.30636	0.0503	0.0021	283.2	6.2	276	11	183	89	283.2	6.2	-54.7541	-2.6087
	081018_6_22	143.2	130	0.902	0.33	0.015	0.04493	0.0011	0.20136	0.0533	0.0025	283.3	6.5	288	12	305	98	283.3	6.5	7.11475	1.63194
	081018_6_1	92	145.2	1.595	0.364	0.017	0.0451	0.0011	0.18468	0.0588	0.0028	284.2	7	313	13	489	100	284.2	7	41.8814	9.20128
	081018_6_9	285	239.3	0.85	0.325	0.012	0.04542	0.00091	0.063696	0.052	0.002	286.3	5.6	284.4	9	243	81	286.3	5.6	-17.8189	-0.668073
	081018_6_13	320	280	0.841	0.3239	0.01	0.04546	0.00099	0.28882	0.0516	0.0016	286.5	6.1	284	8	248	69	286.5	6.1	-15.5242	-0.880282
	081018_6_49	545	317.3	0.5755	0.323	0.011	0.04577	0.00095	0.33608	0.051	0.0016	288.4	5.9	283.2	8.6	223	70	288.4	5.9	-29.3274	-1.83616
	081018_6_27	192.7	171	0.859	0.342	0.017	0.0459	0.0014	0.16274	0.0544	0.003	289	8.6	298	13	340	120	289	8.6	15	3.02013
	081018_6_2	218.9	183	0.854	0.328	0.014	0.04589	0.0011	0.22573	0.0519	0.0022	289.1	6.7	286	11	233	89	289.1	6.7	-24.0773	-1.08392
	081018_6_100	125.1	81.9	0.6591	0.32	0.023	0.0461	0.0012	0.24397	0.0499	0.0033	290.3	7.2	278	18	140	140	290.3	7.2	-107.357	-4.42446
	081018_6_51	208	207	0.964	0.353	0.015	0.04699	0.00096	0.068833	0.0537	0.0022	296	5.9	305	11	335	89	296	5.9	11.6418	2.95082
	081018_6_64	777	775.6	0.992	0.3536	0.008	0.04919	0.00083	0.23969	0.0521	0.0012	309.5	5.1	307.8	6.2	282	51	309.5	5.1	-9.75177	-0.552307
	081018_6_19	161.1	183.4	1.128	0.434	0.019	0.0573	0.0012	0.21461	0.0544	0.0022	359.3	7.5	364	13	355	88	359.3	7.5	-1.21127	1.29121
	081018_6_90	74.4	82.6	1.097	0.519	0.024	0.0634	0.0013	0.24628	0.0599	0.0028	396.2	7.9	423	17	525	99	396.2	7.9	24.5333	6.3357
	081018_6_105	285	528	1.977	0.503	0.013	0.06633	0.0011	0.41625	0.0554	0.0013	413.9	6.8	412.6	8.8	407	53	413.9	6.8	-1.69533	-0.315075
	081018_6_87	296.5	515	1.712	0.526	0.012	0.06905	0.0011	0.35962	0.0552	0.0012	430.4	6.6	428.4	8.3	402	48	430.4	6.6	-7.06468	-0.466853
	081018_6_91	116.8	128.9	1.082	0.553	0.022	0.0693	0.0014	0.24728	0.058	0.0023	431.6	8.2	444	15	473	84	431.6	8.2	8.75264	2.79279
	081018_6_46	50.9	187	3.64	0.681	0.021	0.0839	0.0016	0.31627	0.0586	0.0017	520.5	9.9	526	13	519	64	520.5	9.9	-0.289017	1.04563
	081018_6_77	59.8	106	1.864	0.735	0.031	0.0892	0.0021	0.25603	0.0596	0.0024	550	12	556	18	542	90	550	12	-1.47601	1.07914
	081018_6_61	66.8	48.8	0.765	0.767	0.038	0.0917	0.0023	0.23519	0.0603	0.0029	567	14	571	22	540	100	567	14	-5	0.700525
	081018_6_54	69.9	104.3	1.472	0.77	0.027	0.0929	0.002	0.21898	0.06	0.0021	572	12	577	16	558	76	572	12	-2.50896	0.866551
	081018_6_63	128.3	105.4	0.817	0.781	0.026	0.0942	0.0021	0.27486	0.0602	0.002	580	12	583	15	565	72	580	12	-2.65487	0.51458
	081018_6_3	102.1	51.74	0.5094	0.807	0.053	0.0949	0.0023	0.22516	0.0617	0.0038	584	13	592	29	560	130	584	13	-4.28571	1.35135
	081018_6_20	646	101.4	0.1554	0.801	0.029	0.095	0.002	0.28611	0.0606	0.0021	584.8	12	594	16	596	72	584.8	12	1.87919	1.54882
	081018_6_44	37.2	61	1.631	0.817	0.041	0.0969	0.0023	0.2033	0.0612	0.003	596	13	600	23	570	110	596	13	-4.5614	0.666667
	081018_6_65	41.71	103	2.49	0.824	0.029	0.0993	0.002	0.10013	0.0606	0.0023	609.9	12	607	16	566	80	609.9	12	-7.75618	-0.477759
	081018_6_23	41.6	325	7.68	1.022	0.025	0.1161	0.0022	0.58957	0.0633	0.0015	708	13	714	13	700	50	708	13	-1.14286	0.840336
	081018_6_31	100.5	47.73	0.474	1.4	0.059	0.1451	0.0035	0.20624	0.0698	0.0029	873	20	884	25	873	91	873	20	0	1.24434
	081018_6_62	64.4	12.4	0.2086	2.03	0.14	0.1976	0.006	0.042071	0.0754	0.0053	1161	32	1117	43	990	140	990	140	-17.2727	-3.93912
	081018_6_89	184.2	140.1	0.757	1.959	0.052	0.1849	0.0035	0.37536	0.077	0.0019	1093	19	1098	18	1102	49	1102	49	0.816697	0.455373
	081018_6_47	280	44	0.1638	2.1	0.082	0.1927	0.0049	0.33052	0.0793	0.003	1134	27	1139	27	1121	78	1121	78	-1.15968	0.438982
	081018_6_85	136.8	62.1	0.457	2.072	0.064	0.1915	0.0034	0.08083	0.0787	0.0025	1129	18	1134	21	1134	63	1134	63	0.440917	0.440917
	081018_6_72	168.1	100.7	0.598	2.088	0.052	0.1933	0.0034	0.22048	0.0781	0.0019	1139	18	1143	17	1139	48	1139	48	0	0.349956
	081018_6_42	218.6	180.9	0.827	2.155	0.048	0.198	0.004	0.55771	0.0789	0.0015	1164	22	1168	16	1158	40	1158	40	-0.518135	0.342466
	081018_6_18	86.9	60.81	0.692	2.431	0.087	0.2098	0.0041	0.3729	0.0833	0.0027	1227	22	1245	25	1258	62	1258	62	2.46423	1.44578
	081018_6_68	44	383.5	10.74	3.438	0.067	0.2632	0.0044	0.6536	0.09463	0.0014	1506	23	1512	16	1517	28	1517	28	0.725115	0.396825
	081018_6_15	238.9	359.7	1.486	3.6	0.075	0.2702	0.0046	0.53252	0.0958	0.0016	1543	23	1547	16	1537	32	1537	32	-0.390371	0.258565
	081018_6_24	61	417.9	6.81	3.759	0.079	0.2793	0.0051	0.85255	0.0969	0.0015	1587	26	1581	17	1559	29	1559	29	-1.79602	-0.379507
	081018_6_40	192.9	99.6	0.5199	3.736	0.094	0.2755	0.0053	0.37306	0.0981	0.0023	1568	27	1577	19	1572	44	1572	44	0.254453	0.570704
	081018_6_35	154.3	906	5.76	3.885	0.086	0.2834	0.0056	0.75872	0.0987	0.0016	1607	28	1608	18	1596	30	1596	30	-0.689223	0.0621891
	081018_6_4	234.6	111.9	0.4806	4.238	0.11	0.2962	0.0065	0.57662	0.1036	0.0022	1671	32	1677	21	1678	40	1678	40	0.417163	0.357782
	081018_6_30	345.8	343	0.98	4.484	0.11	0.31	0.0063	0.71781	0.1044	0.0018	1739	31	1726	19	1696	32	1696	32	-2.53538	-0.753187
	081018_6_93	236.1	158.3	0.6644	4.644	0.089	0.3087	0.0047	0.41744	0.1091	0.0018	1734	23	1755	16	1778	31	1778	31	2.47469	1.19658
	081018_6_32	430	345	0.825	11.64	0.26	0.4859	0.0097	0.80904	0.1728	0.0025	2551	42	2573	21	2582	25	2582	25	1.20062	0.855033
	U-Pb LA-ICPMS detrital zircon data
	Sample Location: GSQ Dobbyn 1 Well, Queensland (sample name: 101018-2; Dobbyn, Queensland)
	Formation: Normanton Formation
	Sample #	Th (PPM)	U (PPM)	Th/U	Pb207	±	Pb206	±	Error	Pb207	±	Pb206	± 2σ	Pb207	± 2σ	Pb207	± 2σ	Preferred	± 2σ	Pb-Pb/U-Pb Discordance (%)	U-Pb/U-Pb Discordance (%)
	101018-2				/U235	2σ	/U238	2σ	Corr.	/Pb206	2σ	/U238 (Ma)	(Ma)	/U235	(Ma)	/Pb206	(Ma)	Age	(Ma)
	101018_2_1	177.6	153.7	0.845	0.0899	0.0065	0.01359	0.00043	-0.015428	0.049	0.0037	87	2.7	86.8	6	80	150	87	2.7	-8.75	-0.230415
	101018_2_69	38.98	37.67	0.969	0.092	0.016	0.01497	0.00072	-0.024809	0.0448	0.0081	95.8	4.6	86	14	-260	280	95.8	4.6	136.846	-11.3953
	101018_2_10	151	104.9	0.766	0.1037	0.0094	0.01514	0.00049	0.22339	0.0511	0.005	96.9	3.1	99.1	8.6	80	180	96.9	3.1	-21.125	2.21998
	101018_2_28	108.8	84.3	0.772	0.108	0.013	0.01529	0.00066	0.037172	0.0512	0.0064	97.8	4.2	102	12	120	240	97.8	4.2	18.5	4.11765
	101018_2_87	247	148	0.5957	0.1069	0.0083	0.01541	0.00051	0.091953	0.0508	0.0041	98.5	3.2	102.3	7.6	140	160	98.5	3.2	29.6429	3.71457
	101018_2_36	136.3	101.4	0.743	0.101	0.011	0.01544	0.00047	-0.058374	0.0488	0.0055	98.7	3	96.4	9.6	-40	200	98.7	3	346.75	-2.38589
	101018_2_20	148.5	86.3	0.58	0.104	0.01	0.01548	0.00057	0.067858	0.0495	0.0047	99	3.6	99.1	9.3	60	180	99	3.6	-65	0.100908
	101018_2_9	229.7	190.7	0.832	0.1081	0.0072	0.01549	0.00041	0.11874	0.0508	0.0035	99.1	2.6	103.6	6.5	150	130	99.1	2.6	33.9333	4.34363
	101018_2_60	129.7	97.3	0.746	0.106	0.011	0.01554	0.00049	-0.087705	0.0512	0.0055	99.4	3.1	100.7	10	50	200	99.4	3.1	-98.8	1.29096
	101018_2_66	527	316.6	0.5991	0.1076	0.0059	0.01555	0.0004	-0.049551	0.0508	0.003	99.5	2.5	103.3	5.4	170	120	99.5	2.5	41.4706	3.67861
	101018_2_48	356.1	298.4	0.844	0.1035	0.0063	0.0156	0.00038	0.096895	0.0484	0.0029	99.8	2.4	99.5	5.8	60	120	99.8	2.4	-66.3333	-0.301508
	101018_2_65	805	319	0.3895	0.1075	0.0057	0.01562	0.00039	0.085855	0.0499	0.0027	99.9	2.5	103.3	5.2	150	110	99.9	2.5	33.4	3.29138
	101018_2_43	434	204	0.49	0.1078	0.0082	0.01571	0.00044	-0.046189	0.0499	0.004	100.5	2.8	103.4	7.4	120	160	100.5	2.8	16.25	2.80464
	101018_2_2	129	87.1	0.738	0.1	0.011	0.01576	0.00053	0.10731	0.0454	0.005	100.8	3.3	97	10	-60	200	100.8	3.3	268	-3.91753
	101018_2_61	583	343	0.5942	0.1172	0.0068	0.01582	0.00037	0.022832	0.054	0.0032	101.2	2.3	112	6.1	290	130	101.2	2.3	65.1034	9.64286
	101018_2_12	94.5	82.9	0.879	0.1	0.011	0.01594	0.00061	0.093833	0.0475	0.0055	101.9	3.8	97	10	-70	200	101.9	3.8	245.571	-5.05155
	101018_2_6	453	390.1	0.864	0.1102	0.0054	0.01597	0.00038	0.11094	0.0499	0.0025	102.2	2.4	105.9	5	160	110	102.2	2.4	36.125	3.49386
	101018_2_75	85.9	60.29	0.704	0.104	0.014	0.016	0.00067	-0.023175	0.0487	0.0065	102.3	4.2	98	12	-70	230	102.3	4.2	246.143	-4.38776
	101018_2_90	59.5	32.35	0.539	0.101	0.021	0.01608	0.00098	0.065883	0.0467	0.0099	102.8	6.2	93	18	-320	320	102.8	6.2	132.125	-10.5376
	101018_2_14	131	105	0.863	0.1134	0.01	0.01612	0.00049	0.045681	0.0513	0.0047	103.1	3.1	107.9	9.1	130	180	103.1	3.1	20.6923	4.44856
	101018_2_71	430	310	0.7235	0.1121	0.0066	0.01615	0.00042	0.30228	0.0499	0.0028	103.3	2.7	107.4	6	150	110	103.3	2.7	31.1333	3.8175
	101018_2_89	164.5	141.4	0.848	0.1071	0.0092	0.01615	0.00044	0.070431	0.0486	0.0043	103.3	2.8	102.2	8.4	10	160	103.3	2.8	-933	-1.07632
	101018_2_15	184.6	163.2	0.882	0.1107	0.0082	0.01626	0.00046	0.27732	0.0496	0.0036	104	2.9	105.7	7.5	90	140	104	2.9	-15.5556	1.60833
	101018_2_47	499	335	0.701	0.1108	0.0058	0.01646	0.00038	0.049597	0.0487	0.0026	105.2	2.4	106.2	5.3	120	110	105.2	2.4	12.3333	0.94162
	101018_2_45	250.4	120.3	0.4888	0.1119	0.0095	0.01647	0.00051	0.18736	0.0512	0.0044	105.3	3.3	108.8	9.1	110	160	105.3	3.3	4.27273	3.21691
	101018_2_99	104.1	79.1	0.755	0.128	0.012	0.01652	0.00064	0.03787	0.0575	0.0058	105.6	4.1	122	11	320	200	105.6	4.1	67	13.4426
	101018_2_85	77.4	50.89	0.657	0.117	0.016	0.01654	0.00079	-0.031398	0.0524	0.0077	105.7	5	110	15	50	260	105.7	5	-111.4	3.90909
	101018_2_26	301.2	231.3	0.782	0.1157	0.0069	0.0166	0.0004	0.070515	0.0509	0.0032	106.1	2.6	110.7	6.2	160	120	106.1	2.6	33.6875	4.15537
	101018_2_41	118.4	71.8	0.5993	0.114	0.01	0.01674	0.00066	-0.024727	0.0507	0.0051	107	4.2	108	9.3	90	180	107	4.2	-18.8889	0.925926
	101018_2_78	320	224.7	0.706	0.1062	0.0069	0.01677	0.00044	0.051179	0.0466	0.0032	107.2	2.8	102.9	6.6	0	130	107.2	2.8	#DIV/0!	-4.17881
	101018_2_21	119.3	125.8	1.073	0.1076	0.0087	0.01686	0.00048	0.054116	0.0478	0.0041	107.7	3.1	102.8	7.9	-10	160	107.7	3.1	1177	-4.76654
	101018_2_52	233.7	117.8	0.5108	0.118	0.011	0.01687	0.00052	0.1461	0.0515	0.0047	107.8	3.3	112.2	9.6	110	170	107.8	3.3	2	3.92157
	101018_2_67	45.07	56.13	1.24	0.134	0.015	0.01714	0.00067	0.094355	0.0576	0.007	109.5	4.3	125	13	250	220	109.5	4.3	56.2	12.4
	101018_2_74	135.3	82.7	0.642	0.116	0.011	0.01713	0.00058	-0.098059	0.0525	0.0058	109.5	3.7	111	11	70	200	109.5	3.7	-56.4286	1.35135
	101018_2_50	78.4	70.1	0.908	0.11	0.013	0.01721	0.00068	0.16265	0.0475	0.0056	110	4.3	104	12	-80	210	110	4.3	237.5	-5.76923
	101018_2_64	207.7	225	1.048	0.1175	0.0073	0.01737	0.00043	0.13168	0.0489	0.003	111	2.7	112.2	6.6	100	120	111	2.7	-11	1.06952
	101018_2_27	102.6	72.3	0.703	0.12	0.011	0.01751	0.00062	0.11881	0.0489	0.0046	111.9	3.9	113	10	80	190	111.9	3.9	-39.875	0.973451
	101018_2_39	202	160.1	0.798	0.1167	0.0088	0.01777	0.00051	0.045892	0.0484	0.0037	113.6	3.2	111.1	8	60	150	113.6	3.2	-89.3333	-2.25023
	101018_2_68	475	319	0.695	0.1277	0.0071	0.01863	0.00044	-0.0095698	0.0498	0.0029	119	2.8	121.5	6.3	130	110	119	2.8	8.46154	2.05761
	101018_2_63	500.1	265.2	0.5243	0.1274	0.0075	0.01915	0.00045	-0.027053	0.0483	0.003	122.3	2.8	121	6.7	70	120	122.3	2.8	-74.7143	-1.07438
	101018_2_98	369	161.4	0.439	0.1453	0.0095	0.01956	0.00056	0.059586	0.0543	0.0038	124.8	3.5	136.9	8.4	280	140	124.8	3.5	55.4286	8.83857
	101018_2_82	202.5	132.1	0.6495	0.141	0.0099	0.02008	0.00058	0.0047271	0.0512	0.0037	128.2	3.7	132.7	8.8	180	150	128.2	3.7	28.7778	3.39111
	101018_2_56	362	277	0.752	0.1346	0.0079	0.02025	0.00045	0.16716	0.0483	0.0028	129.2	2.9	127.5	7	70	110	129.2	2.9	-84.5714	-1.33333
	101018_2_42	217	178	0.91	0.1388	0.01	0.02028	0.00054	0.0020494	0.0501	0.0036	129.4	3.4	132.2	9.2	140	150	129.4	3.4	7.57143	2.118
	101018_2_84	260.6	207.1	0.784	0.1396	0.0082	0.02034	0.00046	0.11136	0.0503	0.0031	129.8	2.9	132.8	7.5	130	120	129.8	2.9	0.153846	2.25904
	101018_2_76	258	138.1	0.5457	0.139	0.01	0.02079	0.00064	-0.039302	0.0481	0.0037	132.6	4	130.5	9.1	60	150	132.6	4	-121	-1.6092
	101018_2_18	218.5	112.1	0.5192	0.158	0.014	0.02126	0.00065	0.2997	0.0552	0.0047	135.6	4.1	147	12	270	170	135.6	4.1	49.7778	7.7551
	101018_2_96	414.2	360.8	0.867	0.1773	0.0075	0.02503	0.00051	0.11771	0.0512	0.0022	159.4	3.2	165.2	6.5	211	90	159.4	3.2	24.455	3.5109
	101018_2_95	64.1	33	0.536	0.195	0.024	0.0281	0.0013	0.10749	0.0521	0.0065	178.2	8	175	21	100	240	178.2	8	-78.2	-1.82857
	101018_2_13	761	250.3	0.378	0.2037	0.0088	0.02967	0.00066	0.067786	0.0503	0.0022	188.5	4.1	187.5	7.4	175	94	188.5	4.1	-7.71429	-0.533333
	101018_2_79	122	40.4	0.398	0.21	0.023	0.0305	0.0012	0.010917	0.0533	0.0064	193.7	7.3	190	19	100	220	193.7	7.3	-93.7	-1.94737
	101018_2_58	278	380	1.353	0.212	0.0081	0.03069	0.00062	0.20424	0.0501	0.0019	194.8	3.8	194.6	6.8	170	79	194.8	3.8	-14.5882	-0.102775
	101018_2_5	69.6	78.5	1.12	0.214	0.015	0.03075	0.00086	-0.047245	0.0517	0.0039	195.2	5.4	195	12	180	150	195.2	5.4	-8.44444	-0.102564
	101018_2_35	96.1	89.5	0.965	0.223	0.018	0.03093	0.00097	0.16133	0.0519	0.0041	196.3	6	202	15	200	150	196.3	6	1.85	2.82178
	101018_2_59	272.5	330.4	1.205	0.2184	0.0087	0.03101	0.00062	0.16858	0.0511	0.002	196.9	3.8	199.8	7.3	207	84	196.9	3.8	4.87923	1.45145
	101018_2_34	794	580	0.758	0.2165	0.0073	0.03122	0.0006	0.21829	0.05	0.0016	198.1	3.7	198.5	6.1	179	70	198.1	3.7	-10.6704	0.201511
	101018_2_49	565	254.4	0.4616	0.2241	0.0092	0.03123	0.00064	0.093372	0.0523	0.0023	198.2	4	204.5	7.6	248	91	198.2	4	20.0806	3.08068
	101018_2_30	368	261.9	0.7049	0.2266	0.0095	0.03147	0.00062	0.22998	0.0522	0.0021	199.7	3.9	206.5	7.9	252	85	199.7	3.9	20.754	3.29298
	101018_2_80	249.4	188.2	0.751	0.226	0.012	0.03161	0.00074	0.2143	0.0519	0.0026	200.6	4.7	207.2	9.5	250	100	200.6	4.7	19.76	3.18533
	101018_2_92	317.2	354.6	1.109	0.2285	0.0079	0.03196	0.00061	0.19232	0.0523	0.0019	202.8	3.8	209.2	6.7	260	77	202.8	3.8	22	3.05927
	101018_2_11	572	271.2	0.4737	0.246	0.011	0.03266	0.00074	0.32709	0.0548	0.0023	207.2	4.6	222.4	8.7	368	91	207.2	4.6	43.6957	6.83453
	101018_2_38	658	458	0.66	0.2427	0.0082	0.0341	0.00072	0.19944	0.0514	0.0017	216.1	4.5	220.1	6.7	238	72	216.1	4.5	9.20168	1.81736
	101018_2_4	596	395.7	0.662	0.2505	0.01	0.0349	0.00074	0.1682	0.0523	0.0022	221.1	4.6	227.6	8	268	91	221.1	4.6	17.5	2.85589
	101018_2_3	494	311.2	0.631	0.2595	0.01	0.03622	0.0008	0.19748	0.0522	0.0021	229.3	5	233.7	8.3	266	86	229.3	5	13.797	1.88276
	101018_2_23	1121	613	0.5439	0.2716	0.0079	0.03798	0.00068	0.17687	0.0519	0.0015	240.7	4.4	243.5	6.2	255	62	240.7	4.4	5.60784	1.1499
	101018_2_29	84.3	74.46	0.887	0.254	0.02	0.03808	0.00098	0.042514	0.0487	0.0039	240.8	6.1	227	16	50	150	240.8	6.1	-381.6	-6.0793
	101018_2_8	151	118	0.846	0.265	0.015	0.03817	0.0009	0.156	0.0508	0.0029	241.4	5.6	238	12	170	120	241.4	5.6	-42	-1.42857
	101018_2_22	156	89.9	0.5736	0.263	0.016	0.03818	0.00093	-0.0038925	0.0511	0.0033	241.5	5.8	237	13	180	130	241.5	5.8	-34.1667	-1.89873
	101018_2_77	142.1	91.2	0.6351	0.27	0.018	0.03831	0.00093	0.021797	0.0514	0.0034	242.3	5.8	242	14	200	130	242.3	5.8	-21.15	-0.123967
	101018_2_62	185	116.9	0.6254	0.278	0.016	0.03922	0.00087	0.0038608	0.0516	0.0031	247.9	5.4	248	13	200	120	247.9	5.4	-23.95	0.0403226
	101018_2_73	200.4	231.2	1.153	0.304	0.015	0.04135	0.00091	0.16451	0.0533	0.0026	261.1	5.6	268	11	290	100	261.1	5.6	9.96552	2.57463
	101018_2_86	94	97.5	1.015	0.321	0.021	0.04493	0.001	-0.04773	0.0517	0.0036	283.2	6.3	279	16	180	130	283.2	6.3	-57.3333	-1.50538
	101018_2_72	56.7	32.55	0.5752	0.355	0.032	0.047	0.0017	0.33133	0.0547	0.0047	296	11	300	23	230	170	296	11	-28.6957	1.33333
	101018_2_19	324.7	311.8	0.942	0.63	0.019	0.0798	0.0016	0.38632	0.0574	0.0015	494.6	9.7	494	11	477	59	494.6	9.7	-3.68973	-0.121457
	101018_2_91	150.5	77.9	0.516	0.669	0.039	0.0808	0.0024	0.21885	0.0603	0.0035	502	15	512	24	510	120	502	15	1.56863	1.95312
	101018_2_54	46.9	91.9	1.968	0.674	0.029	0.085	0.0019	0.24073	0.0575	0.0024	525.7	11	523	19	470	94	525.7	11	-11.8511	-0.516252
	101018_2_40	43.6	69.6	1.608	0.682	0.035	0.0853	0.0019	0.22979	0.0577	0.0028	527.6	11	522	21	450	110	527.6	11	-17.2444	-1.0728
	101018_2_25	86.4	81.1	0.963	0.684	0.032	0.0854	0.0019	0.066991	0.0583	0.0028	528.2	11	530	19	504	100	528.2	11	-4.80159	0.339623
	101018_2_51	167.8	281	1.68	0.734	0.022	0.0897	0.0018	0.41741	0.059	0.0016	553.7	11	558	13	547	62	553.7	11	-1.22486	0.770609
	101018_2_55	21.31	31.17	1.535	0.751	0.051	0.0899	0.0026	-0.051135	0.0619	0.0046	554	15	556	30	500	150	554	15	-10.8	0.359712
	101018_2_31	2.21	8.35	4.03	0.752	0.088	0.0924	0.0041	0.055363	0.0645	0.0078	569	24	540	54	370	240	569	24	-53.7838	-5.37037
	101018_2_17	368	247	0.659	0.876	0.027	0.1033	0.002	0.52976	0.0617	0.0015	633.3	12	638	14	649	51	633.3	12	2.41911	0.736677
	101018_2_57	98.4	574	6.58	1.255	0.034	0.1312	0.0027	0.75707	0.0692	0.0013	794	15	823	15	894	39	794	15	11.1857	3.52369
	101018_2_32	187.2	169.7	0.906	1.283	0.043	0.1352	0.0028	0.40886	0.0693	0.0022	817	16	836	19	896	63	817	16	8.81696	2.27273
	101018_2_81	100	72.8	0.761	1.737	0.069	0.166	0.0042	0.26773	0.0761	0.0027	989	23	1021	25	1061	77	989	23	6.78605	3.13418
	101018_2_44	23.79	39.7	1.696	1.825	0.076	0.1769	0.0039	0.14448	0.0751	0.0032	1049	21	1048	28	1010	89	1010	89	-3.86139	-0.0954198
	101018_2_33	186.3	58.9	0.3145	1.968	0.068	0.1858	0.0037	0.18377	0.0766	0.0026	1100	19	1098	23	1082	68	1082	68	-1.66359	-0.182149
	101018_2_53	218	107.4	0.4923	2.182	0.062	0.1986	0.0035	0.32286	0.0793	0.0021	1168	19	1171	20	1164	51	1164	51	-0.343643	0.256191
	101018_2_37	148.2	573.1	4.01	5.335	0.11	0.3073	0.0054	0.70586	0.1254	0.0019	1727	27	1872	17	2029	27	2029	27	14.8842	7.74573
	U-Pb LA-ICPMS detrital zircon data
	Sample Location: GSQ Ebagoola 1 Well, Queensland (sample name: 101018-4; Ebagoola, Queensland)
	Formation: Gilbert River Formation
	Sample #	Th (PPM)	U (PPM)	Th/U	Pb207	±	Pb206	±	Error	Pb207	±	Pb206	± 2σ	Pb207	± 2σ	Pb207	± 2σ	Preferred	± 2σ	Pb-Pb/U-Pb Discordance (%)	U-Pb/U-Pb Discordance (%)
	101018-4				/U235	2σ	/U238	2σ	Corr.	/Pb206	2σ	/U238 (Ma)	(Ma)	/U235	(Ma)	/Pb206	(Ma)	Age	(Ma)
	101018_4_63	67.9	112.7	1.694	0.153	0.011	0.02302	0.00054	-0.029418	0.0493	0.0039	146.7	3.4	145	10	70	150	146.7	3.4	-109.571	-1.17241
	101018_4_86	79.2	75.3	0.955	0.164	0.012	0.02331	0.0007	0.013811	0.0519	0.004	148.5	4.4	153	10	190	150	148.5	4.4	21.8421	2.94118
	101018_4_14	69.3	58.2	0.84	0.169	0.017	0.02358	0.00073	0.040979	0.0531	0.0056	150.2	4.6	155	15	130	190	150.2	4.6	-15.5385	3.09677
	101018_4_6	80.4	73.8	0.912	0.156	0.017	0.02359	0.00078	-0.13129	0.0477	0.0052	150.3	4.9	146	15	50	210	150.3	4.9	-200.6	-2.94521
	101018_4_12	98.2	76.1	0.7532	0.166	0.013	0.02363	0.00065	0.021436	0.052	0.0044	150.5	4.1	154	11	150	160	150.5	4.1	-0.333333	2.27273
	101018_4_50	53.6	49.74	0.994	0.156	0.019	0.02392	0.00078	0.082753	0.0479	0.0056	152.3	4.9	147	17	0	220	152.3	4.9	#DIV/0!	-3.60544
	101018_4_35	77.1	65.99	0.879	0.154	0.013	0.02392	0.00069	0.095995	0.0468	0.0041	152.4	4.3	143	12	-20	170	152.4	4.3	862	-6.57343
	101018_4_46	51.8	49.6	1.006	0.164	0.016	0.0241	0.00085	0.24322	0.0499	0.0046	153.5	5.4	153	14	90	180	153.5	5.4	-70.5556	-0.326797
	101018_4_25	198.2	175.1	0.868	0.1598	0.0084	0.02416	0.00048	0.15521	0.0478	0.0025	153.9	3	149.7	7.3	70	100	153.9	3	-119.857	-2.80561
	101018_4_42	219	191	0.901	0.1657	0.0088	0.0243	0.0005	0.017093	0.0501	0.0028	154.8	3.2	154.8	7.7	140	110	154.8	3.2	-10.5714	0
	101018_4_59	43.2	44.39	1.05	0.159	0.016	0.02436	0.0008	-0.12701	0.0496	0.0056	155.1	5.1	149	15	30	200	155.1	5.1	-417	-4.09396
	101018_4_75	42.77	54.58	1.247	0.154	0.016	0.02445	0.00082	-0.12101	0.0468	0.0052	155.7	5.1	143	14	-60	200	155.7	5.1	359.5	-8.88112
	101018_4_34	180.3	89.4	0.5081	0.17	0.013	0.02461	0.00068	0.01905	0.0518	0.0042	156.7	4.3	157	11	150	150	156.7	4.3	-4.46667	0.191083
	101018_4_68	669	440	0.6472	0.1731	0.0061	0.02496	0.00038	0.15268	0.0503	0.0018	158.9	2.4	161.7	5.3	191	76	158.9	2.4	16.8063	1.7316
	101018_4_51	595	303	0.5263	0.1727	0.0073	0.02544	0.00038	0.093011	0.0492	0.0021	162	2.4	161.1	6.3	136	87	162	2.4	-19.1176	-0.558659
	101018_4_4	1547	909	0.586	0.1861	0.0049	0.02569	0.00032	0.2779	0.0526	0.0013	163.5	2	173.1	4.2	287	57	163.5	2	43.0314	5.54593
	101018_4_69	244.3	250.6	1	0.1811	0.0086	0.02691	0.00045	0.11932	0.0495	0.0024	171.1	2.9	169.2	7.6	129	100	171.1	2.9	-32.6357	-1.12293
	101018_4_36	41.5	31.69	0.78	0.195	0.019	0.02748	0.00098	0.084031	0.0533	0.0054	174.7	6.1	177	16	150	190	174.7	6.1	-16.4667	1.29944
	101018_4_83	950	644	0.6717	0.188	0.0055	0.02752	0.00043	0.203	0.0497	0.0014	175	2.7	174.6	4.7	178	61	175	2.7	1.68539	-0.229095
	101018_4_18	52.9	51.2	0.944	0.197	0.022	0.0279	0.0011	0.11419	0.0523	0.0062	177	7	179	19	170	230	177	7	-4.11765	1.11732
	101018_4_61	333	195.3	0.5986	0.195	0.012	0.02788	0.00067	0.092291	0.0512	0.0033	177.2	4.2	180.1	10	220	130	177.2	4.2	19.4545	1.61022
	101018_4_81	461	375.1	0.8104	0.188	0.0067	0.0279	0.00042	0.27398	0.0493	0.0017	177.4	2.6	174.4	5.7	139	73	177.4	2.6	-27.6259	-1.72018
	101018_4_28	1360	894	0.6624	0.1936	0.0053	0.02832	0.00036	0.34449	0.0495	0.0012	180	2.3	179.4	4.5	162	56	180	2.3	-11.1111	-0.334448
	101018_4_40	182.7	68.4	0.3868	0.176	0.015	0.02857	0.00078	0.055326	0.0449	0.0039	181.5	4.9	163	13	-80	160	181.5	4.9	326.875	-11.3497
	101018_4_22	77	78.9	1.001	0.19	0.013	0.02866	0.0007	0.148	0.0479	0.0035	182.1	4.4	174	11	50	140	182.1	4.4	-264.2	-4.65517
	101018_4_3	133.2	77.9	0.5861	0.197	0.015	0.02877	0.00065	0.035566	0.0498	0.0037	182.8	4.1	180	12	110	150	182.8	4.1	-66.1818	-1.55556
	101018_4_20	70.8	65.3	0.9	0.198	0.016	0.02882	0.0007	0.031705	0.0501	0.0043	183.1	4.4	181	13	90	160	183.1	4.4	-103.444	-1.16022
	101018_4_30	82.8	77.2	0.952	0.199	0.013	0.02893	0.00082	0.065422	0.0504	0.0034	183.8	5.1	183	11	140	130	183.8	5.1	-31.2857	-0.437158
	101018_4_37	93.4	69.9	0.7642	0.204	0.015	0.02897	0.00082	-0.010897	0.0516	0.0041	184	5.2	186	13	190	160	184	5.2	3.15789	1.07527
	101018_4_67	204.4	135.5	0.6605	0.2	0.011	0.02904	0.0006	0.13428	0.0505	0.0029	184.5	3.8	185.2	9.7	160	120	184.5	3.8	-15.3125	0.37797
	101018_4_52	55.4	34.37	0.664	0.18	0.023	0.0292	0.0012	-0.026533	0.0469	0.0064	185.6	7.2	163	20	-120	230	185.6	7.2	254.667	-13.865
	101018_4_27	269.2	321.4	1.174	0.2038	0.0079	0.02929	0.00041	0.25335	0.0502	0.0018	186.1	2.6	187.6	6.6	185	79	186.1	2.6	-0.594595	0.799574
	101018_4_19	63.7	63.2	0.965	0.2	0.024	0.02932	0.001	0.15546	0.0508	0.0061	186.2	6.3	180	20	50	210	186.2	6.3	-272.4	-3.44444
	101018_4_54	177	160	1.106	0.205	0.013	0.02987	0.00084	-0.1241	0.0504	0.0036	189.7	5.2	187	11	150	140	189.7	5.2	-26.4667	-1.44385
	101018_4_72	90.8	115	1.285	0.204	0.012	0.02996	0.0006	0.07596	0.0496	0.0029	190.2	3.8	187.4	9.9	130	120	190.2	3.8	-46.3077	-1.49413
	101018_4_64	342	157.4	0.4668	0.214	0.011	0.03015	0.00059	0.033902	0.0525	0.0029	191.5	3.7	195.6	9.4	230	120	191.5	3.7	16.7391	2.09611
	101018_4_53	164	149.1	1.013	0.205	0.013	0.03035	0.00064	0.205	0.0494	0.0031	192.7	4	188	11	110	120	192.7	4	-75.1818	-2.5
	101018_4_23	22.6	27.28	1.204	0.202	0.027	0.0305	0.0013	0.04552	0.0488	0.0069	193.8	8.2	179	22	-70	240	193.8	8.2	376.857	-8.26816
	101018_4_73	223.1	112.3	0.4932	0.215	0.022	0.03055	0.00095	0.056854	0.0516	0.0055	193.9	6	196	18	180	210	193.9	6	-7.72222	1.07143
	101018_4_8	66	93.2	1.608	0.234	0.016	0.03307	0.00074	0.16875	0.0511	0.0035	209.7	4.6	211	13	160	130	209.7	4.6	-31.0625	0.616114
	101018_4_21	251	184.8	0.7229	0.246	0.01	0.03448	0.00052	0.13049	0.0517	0.0022	218.5	3.3	222.5	8.4	235	89	218.5	3.3	7.02128	1.79775
	101018_4_65	239.1	213.7	0.8895	0.244	0.011	0.03537	0.00057	0.066609	0.0505	0.0024	224	3.6	220.4	8.9	165	97	224	3.6	-35.7576	-1.63339
	101018_4_49	92.8	24.9	0.2924	0.268	0.031	0.0371	0.0014	0.06123	0.0517	0.0062	234.5	8.7	232	25	100	220	234.5	8.7	-134.5	-1.07759
	101018_4_66	129	104.6	0.811	0.282	0.018	0.03821	0.00084	0.0013158	0.0543	0.0037	241.7	5.2	250	14	280	130	241.7	5.2	13.6786	3.32
	101018_4_57	121.9	126.5	1.08	0.273	0.015	0.03912	0.00069	0.16898	0.0508	0.0027	247.3	4.3	243	12	170	110	247.3	4.3	-45.4706	-1.76955
	101018_4_1	421.4	459.8	1.0917	0.2766	0.0077	0.03928	0.00053	0.076364	0.0512	0.0015	248.4	3.3	247.5	6.1	226	64	248.4	3.3	-9.9115	-0.363636
	101018_4_74	176.7	216.4	1.197	0.285	0.012	0.04002	0.0005	0.18577	0.0516	0.0021	252.9	3.1	253.2	9.2	226	86	252.9	3.1	-11.9027	0.118483
	101018_4_48	215.5	187.9	0.913	0.2875	0.0097	0.04021	0.00057	-0.0090397	0.0524	0.0019	254.1	3.6	257.8	8.2	274	81	254.1	3.6	7.26277	1.43522
	101018_4_33	436	406	0.924	0.2801	0.0078	0.04023	0.0006	0.23473	0.0509	0.0013	254.3	3.7	251.2	5.9	218	55	254.3	3.7	-16.6514	-1.23408
	101018_4_10	71.1	85	1.138	0.293	0.017	0.04027	0.00089	0.087752	0.0529	0.0031	254.4	5.5	258	14	260	120	254.4	5.5	2.15385	1.39535
	101018_4_15	247.5	276.3	1.088	0.2908	0.0094	0.04053	0.0006	0.32682	0.0521	0.0016	256.1	3.7	258.4	7.4	258	67	256.1	3.7	0.736434	0.890093
	101018_4_47	133.1	192.9	1.518	0.289	0.013	0.0406	0.00062	0.13538	0.0519	0.0023	256.5	3.9	256	10	229	94	256.5	3.9	-12.0087	-0.195312
	101018_4_32	80	58.3	0.756	0.289	0.02	0.04067	0.001	0.085756	0.0517	0.0036	256.9	6.2	254	16	170	140	256.9	6.2	-51.1176	-1.14173
	101018_4_85	303	196	0.667	0.287	0.011	0.04067	0.00076	0.18436	0.0512	0.002	256.9	4.7	254.9	9	223	85	256.9	4.7	-15.2018	-0.784621
	101018_4_7	601	465	0.847	0.2929	0.008	0.04124	0.00052	0.35688	0.0515	0.0013	260.5	3.2	260.3	6.3	241	56	260.5	3.2	-8.09129	-0.0768344
	101018_4_56	151.1	189.1	1.289	0.283	0.013	0.04143	0.00062	0.26624	0.0497	0.0022	261.7	3.8	251	10	152	94	261.7	3.8	-72.1711	-4.26295
	101018_4_62	468	367	0.796	0.2931	0.0094	0.04176	0.00052	0.062398	0.0511	0.0017	263.7	3.2	262.1	7.4	225	73	263.7	3.2	-17.2	-0.610454
	101018_4_9	116.2	128.7	1.076	0.317	0.013	0.04395	0.0007	0.030846	0.0521	0.0021	277.2	4.3	279.5	10	267	90	277.2	4.3	-3.82022	0.822898
	101018_4_24	51	61.89	1.207	0.329	0.022	0.0441	0.001	0.014394	0.0542	0.0038	278.1	6.4	285	17	280	140	278.1	6.4	0.678571	2.42105
	101018_4_44	171	173	1.037	0.341	0.014	0.04464	0.0008	0.13866	0.0553	0.0023	281.5	4.9	297	11	387	93	281.5	4.9	27.261	5.21886
	101018_4_45	241.5	180.6	0.779	0.314	0.013	0.04468	0.0007	0.12762	0.0513	0.0021	281.7	4.3	275.9	10	215	88	281.7	4.3	-31.0233	-2.10221
	101018_4_70	142.9	163.6	1.141	0.329	0.014	0.04475	0.00066	0.1545	0.0535	0.0023	282.2	4.1	287	11	308	91	282.2	4.1	8.37662	1.67247
	101018_4_43	146.1	212.3	1.516	0.319	0.011	0.04503	0.00061	0.14467	0.0515	0.0018	283.9	3.7	279.9	8.6	230	76	283.9	3.7	-23.4348	-1.42908
	101018_4_29	381	649	1.71	0.3251	0.0078	0.04528	0.00052	0.27414	0.0521	0.0012	285.5	3.2	285.3	5.9	277	50	285.5	3.2	-3.06859	-0.0701016
	101018_4_80	331	318	0.925	0.333	0.011	0.04543	0.00066	0.049772	0.0535	0.0018	286.4	4.1	290.6	8	313	72	286.4	4.1	8.4984	1.44529
	101018_4_39	85.5	82.1	0.996	0.349	0.017	0.04776	0.00087	-0.037819	0.0533	0.0028	300.7	5.4	301	13	280	110	300.7	5.4	-7.39286	0.0996678
	101018_4_79	263	184	0.725	0.362	0.013	0.04987	0.0008	0.22659	0.0529	0.002	313.7	4.9	311.9	10	283	80	313.7	4.9	-10.8481	-0.577108
	101018_4_41	611	389	0.6685	0.364	0.011	0.05023	0.00061	0.094119	0.0528	0.0016	315.9	3.8	314.3	8	289	66	315.9	3.8	-9.30796	-0.509068
	101018_4_2	541	1551	2.99	0.4432	0.0072	0.05971	0.0006	0.33689	0.0539	0.00084	373.8	3.7	372.3	5.1	358	35	373.8	3.7	-4.41341	-0.402901
	101018_4_82	171.2	440.7	2.74	0.504	0.012	0.06644	0.00086	0.48395	0.0551	0.0012	414.6	5.2	414.2	8.4	406	49	414.6	5.2	-2.11823	-0.0965717
	101018_4_38	172.6	475.1	2.86	0.592	0.012	0.07561	0.0008	0.2062	0.0569	0.0011	470.4	4.6	471.6	7.6	472	45	470.4	4.6	0.338983	0.254453
	101018_4_58	13.71	22.88	1.761	0.695	0.051	0.0855	0.0021	-0.068732	0.0602	0.0047	529	13	522	31	460	160	529	13	-15	-1.341
	101018_4_16	94.6	119.7	1.249	0.797	0.027	0.086	0.0015	0.19126	0.0674	0.0023	533.2	8.3	592	15	819	72	533.2	8.3	34.8962	9.93243
	101018_4_78	99.5	79.5	0.789	0.722	0.03	0.088	0.0015	0.084539	0.0597	0.0025	543.6	9	547	17	530	90	543.6	9	-2.56604	0.621572
	101018_4_76	63.3	917	14.3	0.769	0.015	0.093	0.0011	0.44831	0.06006	0.0011	573.2	6.7	578.9	8.4	598	38	573.2	6.7	4.14716	0.984626
	101018_4_13	64.5	44.5	0.669	0.783	0.04	0.0935	0.0019	0.19016	0.0611	0.0032	576	11	580	23	550	110	576	11	-4.72727	0.689655
	101018_4_31	89.1	498.3	5.65	0.854	0.019	0.1001	0.0011	0.17931	0.0622	0.0014	615	6.7	627	11	671	51	615	6.7	8.34575	1.91388
	101018_4_11	196.1	204.3	1.021	1.389	0.031	0.1423	0.0016	0.26217	0.0708	0.0016	857.4	9	882	13	933	47	857.4	9	8.10289	2.78912
	101018_4_55	159.5	582	3.815	1.491	0.028	0.1518	0.0021	0.54762	0.07133	0.0012	911	12	925.9	11	962	34	911	12	5.30146	1.60925
	101018_4_60	156	186	1.228	1.546	0.039	0.1578	0.0024	0.61877	0.071	0.0014	944	13	946	16	947	43	944	13	0.31679	0.211416
	101018_4_84	130.8	213.9	1.628	1.954	0.048	0.1856	0.0035	0.72177	0.0767	0.0014	1097	19	1096	16	1106	37	1106	37	0.813743	-0.0912409
	101018_4_17	121.4	61.2	0.4846	2.246	0.067	0.2034	0.0032	0.24171	0.0802	0.0024	1193	17	1189	21	1167	61	1167	61	-2.22793	-0.336417
	101018_4_5	0.391	63.72	201	2.307	0.057	0.1989	0.0029	0.15175	0.0843	0.0022	1169	16	1210	18	1275	53	1275	53	8.31373	3.38843
	101018_4_77	544	248	0.4427	3.868	0.059	0.2763	0.003	0.46016	0.102	0.0015	1572	15	1606.8	13	1655	28	1655	28	5.01511	2.1658
	U-Pb LA-ICPMS detrital zircon data
	Sample Location: GSQ Rutland Plains 1 Well, Queensland (sample name: RP1-DZ-UGR; Rutland, Queensland)
	Formation: Gilbert River Formation
	Sample #	Th (PPM)	U (PPM)	Th/U	Pb207	±	Pb206	±	Error	Pb207	±	Pb206	± 2σ	Pb207	± 2σ	Pb207	± 2σ	Preferred	± 2σ	Pb-Pb/U-Pb Discordance (%)	U-Pb/U-Pb Discordance (%)
	RP1-DZ-UGR				/U235	2σ	/U238	2σ	Corr.	/Pb206	2σ	/U238 (Ma)	(Ma)	/U235	(Ma)	/Pb206	(Ma)	Age	(Ma)
	RP1_DZ_UGR_84	383	173.5	0.463	0.1279	0.0088	0.01882	0.00048	0.020362	0.0504	0.0033	120.2	3	121.3	7.8	150	130	120.2	3	19.8667	0.906843
	RP1_DZ_UGR_113	320	229	0.712	0.1264	0.0071	0.01883	0.00037	0.088484	0.0504	0.0029	120.2	2.4	120.3	6.4	170	110	120.2	2.4	29.2941	0.0831255
	RP1_DZ_UGR_102	862	688	0.8	0.1272	0.0036	0.01899	0.00029	0.37598	0.0484	0.0015	121.3	1.8	121.4	3.2	106	65	121.3	1.8	-14.434	0.0823723
	RP1_DZ_UGR_90	98.9	33.69	0.3374	0.136	0.018	0.01925	0.0009	-0.074902	0.0559	0.0076	122.8	5.7	127	15	160	250	122.8	5.7	23.25	3.30709
	RP1_DZ_UGR_56	619	510	0.812	0.1323	0.0036	0.01953	0.00027	0.17726	0.0498	0.0013	124.7	1.7	126	3.2	169	59	124.7	1.7	26.213	1.03175
	RP1_DZ_UGR_92	171.2	76.8	0.437	0.141	0.01	0.0198	0.00052	-0.11758	0.0537	0.0043	126.8	3.4	132.4	9	230	160	126.8	3.4	44.8696	4.22961
	RP1_DZ_UGR_112	255.4	147.3	0.572	0.14	0.013	0.02023	0.00059	0.041681	0.0542	0.0053	129.1	3.7	132	11	260	190	129.1	3.7	50.3462	2.19697
	RP1_DZ_UGR_86	166.2	106.8	0.643	0.149	0.011	0.0207	0.00057	0.22214	0.0516	0.0038	132.1	3.6	140	9.7	210	150	132.1	3.6	37.0952	5.64286
	RP1_DZ_UGR_95	243.4	144.5	0.5872	0.1452	0.0082	0.02139	0.00042	0.23355	0.0495	0.0027	136.4	2.6	136.8	7.3	140	110	136.4	2.6	2.57143	0.292398
	RP1_DZ_UGR_107	82.4	58.6	0.7076	0.17	0.015	0.02405	0.00079	0.076797	0.0519	0.0048	153.2	5	157	13	180	190	153.2	5	14.8889	2.42038
	RP1_DZ_UGR_101	522	462	0.916	0.1628	0.0045	0.02439	0.00036	0.18659	0.0482	0.0016	155.3	2.2	152.9	3.9	95	68	155.3	2.2	-63.4737	-1.56965
	RP1_DZ_UGR_91	332.8	226.2	0.688	0.1739	0.0072	0.02448	0.00042	0.092899	0.051	0.0022	155.9	2.6	162.2	6.2	220	97	155.9	2.6	29.1364	3.88409
	RP1_DZ_UGR_117	270.9	116.2	0.4257	0.161	0.009	0.02451	0.00053	-0.17484	0.0493	0.0034	156.1	3.3	152.1	8.3	100	130	156.1	3.3	-56.1	-2.62985
	RP1_DZ_UGR_82	318	169.4	0.541	0.1864	0.009	0.02647	0.00052	-0.069155	0.0518	0.0026	168.4	3.3	172.6	7.7	227	100	168.4	3.3	25.815	2.43337
	RP1_DZ_UGR_108	500	243.4	0.495	0.2029	0.0073	0.02968	0.00048	0.045503	0.0492	0.002	188.5	3	187	6.2	149	86	188.5	3	-26.5101	-0.802139
	RP1_DZ_UGR_99	76.5	84	1.113	0.209	0.019	0.02994	0.00093	0.083576	0.0526	0.0048	190.1	5.8	190	16	190	180	190.1	5.8	-0.0526316	-0.0526316
	RP1_DZ_UGR_98	403	198.9	0.5018	0.209	0.0088	0.03051	0.0005	0.05933	0.0502	0.0021	193.7	3.1	191.9	7.4	174	89	193.7	3.1	-11.3218	-0.937989
	RP1_DZ_UGR_29	2210	1191	0.558	0.264	0.0048	0.03434	0.00058	0.66146	0.05603	0.00078	217.6	3.6	237.6	3.8	442	31	217.6	3.6	50.7692	8.41751
	RP1_DZ_UGR_120	674	500	0.766	0.249	0.013	0.0351	0.00098	0.27408	0.055	0.0022	222.4	6.1	225	11	401	95	222.4	6.1	44.5387	1.15556
	RP1_DZ_UGR_103	113.2	108.3	0.954	0.241	0.016	0.03523	0.00074	0.16095	0.0486	0.0033	223.2	4.6	217	13	80	130	223.2	4.6	-179	-2.85714
	RP1_DZ_UGR_76	589	288.1	0.5	0.2524	0.0071	0.03557	0.00053	-0.018976	0.0519	0.0017	225.3	3.3	228	5.7	259	66	225.3	3.3	13.0116	1.18421
	RP1_DZ_UGR_94	181.8	113.5	0.6168	0.257	0.013	0.03586	0.0007	0.040916	0.0529	0.0027	227.1	4.4	233	10	270	100	227.1	4.4	15.8889	2.53219
	RP1_DZ_UGR_19	649	391.9	0.607	0.2697	0.0081	0.03659	0.00049	0.092892	0.0538	0.0017	231.7	3.1	242	6.5	336	68	231.7	3.1	31.0417	4.2562
	RP1_DZ_UGR_41	1356	1164	0.855	0.2664	0.0059	0.03723	0.00047	0.27824	0.05319	0.001	235.6	2.9	239.6	4.7	332	45	235.6	2.9	29.0361	1.66945
	RP1_DZ_UGR_24	577	286.4	0.504	0.274	0.01	0.03738	0.0005	0.016861	0.0531	0.0021	236.6	3.1	245.5	8.2	300	85	236.6	3.1	21.1333	3.62525
	RP1_DZ_UGR_23	1530	971	0.644	0.2741	0.0057	0.03844	0.00049	0.28568	0.0522	0.0011	243.1	3	245.7	4.5	281	47	243.1	3	13.4875	1.0582
	RP1_DZ_UGR_53	416	269	0.674	0.2692	0.0074	0.03838	0.00049	0.11166	0.0508	0.0014	243.1	3.1	241.4	5.9	204	59	243.1	3.1	-19.1667	-0.704225
	RP1_DZ_UGR_26	225.1	154.6	0.688	0.2755	0.0093	0.03915	0.00053	0.23211	0.0512	0.0017	247.5	3.3	245.9	7.4	209	70	247.5	3.3	-18.4211	-0.650671
	RP1_DZ_UGR_13	1432	1018	0.7103	0.2807	0.0046	0.0396	0.00038	0.43004	0.05167	0.00076	250.3	2.4	251	3.7	258	33	250.3	2.4	2.9845	0.278884
	RP1_DZ_UGR_81	681	365	0.574	0.286	0.0077	0.03967	0.00053	0.1329	0.052	0.0014	250.8	3.3	254.8	6.1	269	62	250.8	3.3	6.7658	1.56986
	RP1_DZ_UGR_104	446.9	317.9	0.702	0.2837	0.0084	0.0397	0.0006	0.0092461	0.0522	0.0017	251	3.7	252.9	6.7	261	70	251	3.7	3.83142	0.751285
	RP1_DZ_UGR_80	116.2	131.3	1.124	0.285	0.014	0.04026	0.00067	-0.0067648	0.0513	0.0025	254.4	4.2	253	11	226	100	254.4	4.2	-12.5664	-0.55336
	RP1_DZ_UGR_73	310	197.6	0.648	0.291	0.013	0.04028	0.0007	0.0093164	0.0539	0.0024	254.5	4.3	260.1	9.6	320	94	254.5	4.3	20.4688	2.15302
	RP1_DZ_UGR_51	237.4	161.6	0.676	0.2831	0.0099	0.04057	0.00049	0.037964	0.0515	0.0018	256.3	3.1	253.1	7.7	255	72	256.3	3.1	-0.509804	-1.26432
	RP1_DZ_UGR_69	568	500	0.862	0.2871	0.0055	0.04062	0.00036	0.0022107	0.05114	0.00096	256.6	2.2	255.9	4.3	235	42	256.6	2.2	-9.19149	-0.273544
	RP1_DZ_UGR_30	277.9	62.3	0.2231	0.294	0.02	0.04085	0.00095	0.10797	0.0521	0.0035	258.1	5.9	259	16	220	140	258.1	5.9	-17.3182	0.34749
	RP1_DZ_UGR_106	130	125.1	1.285	0.295	0.015	0.04092	0.0008	0.16426	0.0541	0.003	258.5	4.9	260	12	300	110	258.5	4.9	13.8333	0.576923
	RP1_DZ_UGR_60	290	217.1	0.76	0.2914	0.009	0.041	0.00055	0.015693	0.0501	0.0015	259	3.4	259	7.1	185	64	259	3.4	-40	0
	RP1_DZ_UGR_36	1360	745	0.5462	0.2935	0.0069	0.04109	0.00036	0.20377	0.0531	0.001	259.6	2.2	261	5.5	319	44	259.6	2.2	18.6207	0.536398
	RP1_DZ_UGR_74	251.9	159.7	0.6328	0.293	0.012	0.04144	0.00072	-0.080724	0.0514	0.0024	261.7	4.5	262.3	9.5	210	97	261.7	4.5	-24.619	0.228746
	RP1_DZ_UGR_75	327.6	163.3	0.4945	0.308	0.013	0.04323	0.00069	0.027692	0.0523	0.0023	272.8	4.2	271	10	260	90	272.8	4.2	-4.92308	-0.664207
	RP1_DZ_UGR_72	553	289	0.519	0.3109	0.0083	0.04374	0.00074	-0.56673	0.0521	0.0012	274.7	3.9	274.1	6.3	276	50	274.7	3.9	0.471014	-0.218898
	RP1_DZ_UGR_6	174.4	465	2.644	0.327	0.01	0.0436	0.0011	0.53706	0.0554	0.0015	275.1	6.6	286.9	7.9	404	61	275.1	6.6	31.9059	4.11293
	RP1_DZ_UGR_70	826	901	1.083	0.3101	0.005	0.04372	0.00037	0.17478	0.0513	0.00072	275.9	2.3	274	3.9	244	32	275.9	2.3	-13.0738	-0.693431
	RP1_DZ_UGR_121	450	422	0.936	0.323	0.011	0.0444	0.00071	0.38577	0.0509	0.0016	280	4.4	283.9	8.6	221	71	280	4.4	-26.6968	1.37372
	RP1_DZ_UGR_111	178	223	1.158	0.317	0.011	0.04454	0.00081	0.049744	0.0519	0.0021	280.9	5	279.4	8.9	245	87	280.9	5	-14.6531	-0.536865
	RP1_DZ_UGR_96	264.7	305.6	1.137	0.3221	0.0097	0.04477	0.00058	0.14535	0.0524	0.0015	282.3	3.6	282.7	7.4	277	64	282.3	3.6	-1.91336	0.141493
	RP1_DZ_UGR_63	172	1470	8.21	0.3274	0.0056	0.04537	0.00039	-0.21036	0.05178	0.00068	286	2.4	287.3	4.3	273	31	286	2.4	-4.7619	0.452489
	RP1_DZ_UGR_115	274	91.1	0.3405	0.332	0.016	0.04549	0.00082	0.08478	0.0541	0.0026	286.7	5	291	12	308	100	286.7	5	6.91558	1.47766
	RP1_DZ_UGR_62	256.1	369.3	1.5	0.3249	0.0081	0.04552	0.00041	0.24458	0.0516	0.0012	286.9	2.5	285.7	6.3	251	50	286.9	2.5	-14.3028	-0.420021
	RP1_DZ_UGR_35	165	155	0.94	0.331	0.017	0.04553	0.00078	0.018861	0.0534	0.0027	287	4.8	288	13	270	100	287	4.8	-6.2963	0.347222
	RP1_DZ_UGR_58	634	635	1.003	0.3252	0.0066	0.04552	0.00037	0.14495	0.0518	0.00091	287	2.3	285.5	5.1	271	39	287	2.3	-5.90406	-0.525394
	RP1_DZ_UGR_68	226.3	459	2.011	0.3231	0.0061	0.04558	0.00039	0.12588	0.05161	0.00094	287.3	2.4	284.4	4.8	252	40	287.3	2.4	-14.0079	-1.01969
	RP1_DZ_UGR_50	96.2	352	3.6	0.3297	0.0079	0.04561	0.00046	0.16491	0.0524	0.0012	287.5	2.8	289.4	6.1	287	51	287.5	2.8	-0.174216	0.656531
	RP1_DZ_UGR_110	347	512	1.89	0.3315	0.0092	0.04571	0.00084	0.4445	0.0532	0.0015	288.1	5.2	290	7	314	63	288.1	5.2	8.24841	0.655172
	RP1_DZ_UGR_9	747.3	717.9	0.955	0.362	0.011	0.04576	0.00096	0.61687	0.0571	0.0014	288.4	5.9	313.5	7.9	482	54	288.4	5.9	40.166	8.00638
	RP1_DZ_UGR_37	208.7	192	0.916	0.33	0.011	0.04581	0.00055	0.15873	0.0513	0.0017	288.7	3.4	288.2	8.7	225	72	288.7	3.4	-28.3111	-0.173491
	RP1_DZ_UGR_57	448	263	0.749	0.335	0.011	0.04631	0.00073	0.33931	0.0522	0.0016	291.8	4.5	293	8.2	259	64	291.8	4.5	-12.6641	0.409556
	RP1_DZ_UGR_77	323.5	418	1.279	0.3353	0.008	0.04661	0.0006	0.19869	0.052	0.0012	293.6	3.7	293	6	275	53	293.6	3.7	-6.76364	-0.204778
	RP1_DZ_UGR_66	145.4	265	1.75	0.3365	0.0081	0.04678	0.00053	0.10251	0.0516	0.0012	294.7	3.3	293.8	6.2	248	52	294.7	3.3	-18.8306	-0.306331
	RP1_DZ_UGR_119	251	119.1	0.4793	0.347	0.014	0.04695	0.00091	0.10535	0.0551	0.0025	295.7	5.6	301	11	357	97	295.7	5.6	17.1709	1.7608
	RP1_DZ_UGR_38	197.7	284.8	1.428	0.3494	0.0099	0.04763	0.00055	0.059233	0.0547	0.0017	299.9	3.4	303.6	7.4	376	70	299.9	3.4	20.2394	1.21871
	RP1_DZ_UGR_55	811	811	1.016	0.3493	0.0065	0.04774	0.0005	0.46339	0.05326	0.00076	300.6	3.1	303.8	4.9	329	32	300.6	3.1	8.63222	1.05332
	RP1_DZ_UGR_14	440	357	0.8176	0.3584	0.0073	0.04881	0.00054	0.099447	0.0537	0.0012	307.2	3.3	310.6	5.4	336	50	307.2	3.3	8.57143	1.09466
	RP1_DZ_UGR_64	615	368	0.5903	0.3543	0.0083	0.04894	0.00042	0.17159	0.0528	0.0011	308	2.6	307.2	6.3	306	44	308	2.6	-0.653595	-0.260417
	RP1_DZ_UGR_52	1043	813	0.7727	0.366	0.0065	0.05047	0.00041	0.32819	0.0523	0.00077	317.4	2.5	316.3	4.8	287	33	317.4	2.5	-10.5923	-0.347771
	RP1_DZ_UGR_61	270.9	314.6	1.1554	0.405	0.012	0.05084	0.00069	0.28936	0.0559	0.0017	319.6	4.2	344.8	8.9	430	68	319.6	4.2	25.6744	7.30858
	RP1_DZ_UGR_22	601	488	0.8	0.3736	0.0066	0.05116	0.00048	0.28434	0.05298	0.00088	321.6	2.9	321.9	4.9	312	38	321.6	2.9	-3.07692	0.0931966
	RP1_DZ_UGR_54	284	229	0.762	0.374	0.014	0.05122	0.00069	0.22631	0.0541	0.0018	322	4.2	320.9	10	344	73	322	4.2	6.39535	-0.342786
	RP1_DZ_UGR_47	712	610	0.851	0.3837	0.0097	0.05206	0.00058	0.4258	0.0549	0.0013	327.1	3.5	329.2	7	387	50	327.1	3.5	15.478	0.63791
	RP1_DZ_UGR_33	300	294	0.973	0.396	0.027	0.05391	0.00083	-0.66443	0.056	0.0016	338.4	5.1	363.6	8.9	435	66	338.4	5.1	22.2069	6.93069
	RP1_DZ_UGR_87	377	311.1	0.8205	0.3921	0.0088	0.05396	0.00069	0.15948	0.0527	0.0014	338.8	4.2	335.3	6.4	295	59	338.8	4.2	-14.8475	-1.04384
	RP1_DZ_UGR_67	245	272	1.041	0.417	0.011	0.05592	0.00062	0.22738	0.0543	0.0013	350.7	3.8	353.5	8	353	52	350.7	3.8	0.651558	0.792079
	RP1_DZ_UGR_44	210	438	2.004	0.428	0.011	0.05688	0.00074	0.36851	0.0548	0.0011	356.6	4.5	360.9	8.1	388	46	356.6	4.5	8.09278	1.19147
	RP1_DZ_UGR_34	952	605	0.6319	0.452	0.013	0.0601	0.0021	0.70663	0.0565	0.0012	376	13	378.2	8.9	458	47	376	13	17.9039	0.581703
	RP1_DZ_UGR_71	399	340	0.873	0.443	0.019	0.06025	0.00091	0.35272	0.0545	0.0017	377.1	5.5	371	12	380	74	377.1	5.5	0.763158	-1.6442
	RP1_DZ_UGR_32	1055	656.7	0.6214	0.4555	0.0072	0.06061	0.00058	0.37791	0.0547	0.00079	379.3	3.5	380.8	5	390	32	379.3	3.5	2.74359	0.393908
	RP1_DZ_UGR_4	351	738	2.128	0.4752	0.01	0.06308	0.00089	0.018718	0.0546	0.0012	394.3	5.4	394.5	7	384	51	394.3	5.4	-2.68229	0.0506971
	RP1_DZ_UGR_27	618	282	0.471	0.489	0.012	0.06396	0.00064	0.19655	0.0558	0.0012	399.6	3.9	403.3	8	424	51	399.6	3.9	5.75472	0.917431
	RP1_DZ_UGR_3	224	437	3.37	0.488	0.013	0.06416	0.00091	0.16834	0.0555	0.0016	400.8	5.5	404.4	9.2	411	62	400.8	5.5	2.48175	0.890208
	RP1_DZ_UGR_46	529	388	0.725	0.49	0.013	0.0644	0.0011	0.080604	0.0551	0.0011	402.5	6.4	403.5	8.8	400	43	402.5	6.4	-0.625	0.247831
	RP1_DZ_UGR_1	229	334	1.519	0.4874	0.0087	0.06458	0.00054	0.34854	0.05495	0.00087	403.4	3.3	402.5	6	399	36	403.4	3.3	-1.10276	-0.223602
	RP1_DZ_UGR_59	112.7	419	3.44	0.489	0.012	0.06473	0.00079	-0.078352	0.0548	0.0011	404.2	4.8	403.2	7.9	383	44	404.2	4.8	-5.53525	-0.248016
	RP1_DZ_UGR_2	154.8	470	3.054	0.4887	0.0072	0.06496	0.00059	0.23001	0.05501	0.00081	405.7	3.6	403.6	4.9	402	32	405.7	3.6	-0.920398	-0.520317
	RP1_DZ_UGR_116	136.6	465	3.428	0.492	0.01	0.06547	0.00084	0.26983	0.054	0.0012	408.8	5.1	405.4	7.2	355	52	408.8	5.1	-15.1549	-0.838678
	RP1_DZ_UGR_39	218.9	301.3	1.378	0.498	0.011	0.06566	0.00063	0.21514	0.0551	0.0011	409.9	3.8	410.2	7.5	395	45	409.9	3.8	-3.77215	0.0731351
	RP1_DZ_UGR_7	226.8	131.8	0.5761	0.512	0.016	0.06658	0.00098	0.23108	0.0564	0.0017	415.4	5.9	419	10	436	69	415.4	5.9	4.72477	0.859189
	RP1_DZ_UGR_89	712	362	0.546	0.51	0.013	0.06669	0.00083	0.1355	0.0551	0.0014	416.2	5	417	9.2	413	56	416.2	5	-0.774818	0.191847
	RP1_DZ_UGR_122	164.5	313	1.883	0.526	0.013	0.06831	0.00095	0.22001	0.056	0.0013	425.9	5.7	427.8	8.4	434	53	425.9	5.7	1.86636	0.444133
	RP1_DZ_UGR_45	194	264	2.3	0.55	0.015	0.0713	0.00088	-0.082085	0.0557	0.0011	443.9	5.3	443.5	9.6	419	45	443.9	5.3	-5.94272	-0.0901917
	RP1_DZ_UGR_20	330	194	0.659	0.572	0.013	0.07377	0.00082	0.22564	0.0568	0.0013	458.8	4.9	458.3	8.3	457	50	458.8	4.9	-0.393873	-0.109099
	RP1_DZ_UGR_31	217.7	124.7	0.5713	0.575	0.017	0.07389	0.00095	0.053608	0.057	0.0018	459.5	5.7	460	11	454	69	459.5	5.7	-1.21145	0.108696
	RP1_DZ_UGR_40	898	532	0.578	0.5899	0.011	0.07613	0.00057	0.039696	0.0562	0.00079	472.9	3.4	470	6.8	448	31	472.9	3.4	-5.55804	-0.617021
	RP1_DZ_UGR_21	-9.40593e-05	5.36	-56700	0.642	0.074	0.0766	0.0036	0.043628	0.062	0.0068	474	21	473	46	390	230	474	21	-21.5385	-0.211416
	RP1_DZ_UGR_100	146.8	139.7	0.9454	0.619	0.017	0.0791	0.0012	0.041858	0.0562	0.0017	490.6	7.2	487	11	434	70	490.6	7.2	-13.0415	-0.73922
	RP1_DZ_UGR_11	336	262	0.776	0.659	0.016	0.0829	0.0011	0.15754	0.0584	0.0014	513.2	6.3	513	9.5	539	53	513.2	6.3	4.78664	-0.0389864
	RP1_DZ_UGR_48	184	204	1.095	0.696	0.02	0.08727	0.00082	0.17036	0.0582	0.0014	539.9	5	535	11	507	52	539.9	5	-6.48915	-0.915888
	RP1_DZ_UGR_10	135.2	341.6	2.76	0.713	0.012	0.08847	0.0008	0.33507	0.05904	0.00086	546.4	4.7	546.2	7	555	32	546.4	4.7	1.54955	-0.0366166
	RP1_DZ_UGR_97	133	63.7	0.521	0.789	0.03	0.096	0.0017	0.12415	0.0587	0.0022	590.4	10	586	17	521	88	590.4	10	-13.3205	-0.750853
	RP1_DZ_UGR_5	124.3	52	0.4171	0.874	0.042	0.1037	0.0027	-0.073617	0.0616	0.0034	636	16	634	23	600	120	636	16	-6	-0.315457
	RP1_DZ_UGR_78	121.8	81.8	0.6658	1.647	0.039	0.1648	0.0022	0.19274	0.0724	0.0018	983	12	987	15	989	51	983	12	0.606673	0.405268
	RP1_DZ_UGR_114	69.1	47.7	0.689	2.042	0.071	0.1908	0.0032	0.34437	0.0781	0.0025	1125	17	1127	24	1110	66	1110	66	-1.35135	0.177462
	RP1_DZ_UGR_49	135.4	122.5	0.899	2.034	0.051	0.1894	0.0031	0.316	0.0781	0.0019	1118	17	1125	17	1135	49	1135	49	1.4978	0.622222
	RP1_DZ_UGR_83	366.4	70.81	0.1906	2.144	0.045	0.1944	0.0027	0.094391	0.08	0.0022	1145	15	1159	15	1177	54	1177	54	2.71878	1.20794
	RP1_DZ_UGR_93	207	31.3	0.1668	2.119	0.08	0.1899	0.0038	0.33169	0.0823	0.0035	1120	20	1144	26	1197	86	1197	86	6.43275	2.0979
	RP1_DZ_UGR_85	106.3	50.9	0.4729	3.529	0.078	0.2667	0.0037	0.14253	0.0963	0.0022	1524	19	1529	18	1538	45	1538	45	0.910273	0.327011
	RP1_DZ_UGR_15	391.8	202.3	0.5157	3.471	0.042	0.2648	0.0026	0.52725	0.09602	0.00099	1514	13	1519.6	9.5	1544	19	1544	19	1.94301	0.368518
	RP1_DZ_UGR_43	220.6	353.8	1.601	3.121	0.061	0.2392	0.0038	0.70445	0.0965	0.0013	1382	20	1436	15	1553	24	1553	24	11.0109	3.76045
	RP1_DZ_UGR_25	309	356	1.41	4.475	0.048	0.3026	0.0032	0.57715	0.108	0.001	1704	16	1725.7	8.8	1763	17	1763	17	3.34657	1.25746
	RP1_DZ_UGR_65	417	201.8	0.4914	4.67	0.1	0.313	0.0029	0.60901	0.109	0.0015	1755	14	1757	18	1778	26	1778	26	1.29359	0.11383
	RP1_DZ_UGR_17	200.5	260.6	1.291	7	0.12	0.372	0.0046	0.69739	0.1365	0.0014	2038	22	2110	16	2181	18	2181	18	6.55663	3.41232
	RP1_DZ_UGR_105	91.3	78.2	0.856	17.65	0.25	0.535	0.011	0.3442	0.2392	0.0038	2759	45	2968	14	3111	25	3111	25	11.3147	7.04178
	U-Pb LA-ICPMS detrital zircon data
	Sample Location: GSQ Weipa 1 Well, Queensland (sample name: W1-DZ-UGR; Rutland, Queensland)
	Formation: Gilbert River Formation
	Sample #	Th (PPM)	U (PPM)	Th/U	Pb207	±	Pb206	±	Error	Pb207	±	Pb206	± 2σ	Pb207	± 2σ	Pb207	± 2σ	Preferred	± 2σ	Pb-Pb/U-Pb Discordance (%)	U-Pb/U-Pb Discordance (%)
	W1-DZ-UGR				/U235	2σ	/U238	2σ	Corr.	/Pb206	2σ	/U238 (Ma)	(Ma)	/U235	(Ma)	/Pb206	(Ma)	Age	(Ma)
	W1_DZ_UGR_42	532	290.9	0.5475	0.1407	0.009	0.0203	0.00049	0.30248	0.0499	0.003	129.6	3.1	133.2	8	150	130	129.6	3.1	13.6	2.7027
	W1_DZ_UGR_111	533.3	421.1	0.7797	0.1451	0.0064	0.02075	0.0003	0.29354	0.0491	0.0021	132.4	1.9	137.2	5.7	132	89	132.4	1.9	-0.30303	3.49854
	W1_DZ_UGR_123	157	164.9	1.046	0.1478	0.0084	0.02119	0.00041	0.057779	0.0507	0.0028	135.2	2.6	139.2	7.4	200	120	135.2	2.6	32.4	2.87356
	W1_DZ_UGR_126	482	260	0.579	0.1452	0.0085	0.0212	0.00043	-0.095918	0.0505	0.0029	135.2	2.7	137	7.5	180	120	135.2	2.7	24.8889	1.31387
	W1_DZ_UGR_142	130.4	135.4	1.031	0.1458	0.009	0.0215	0.00053	0.087665	0.0493	0.0032	137.1	3.4	137.2	8	100	130	137.1	3.4	-37.1	0.0728863
	W1_DZ_UGR_151	172	78.1	0.473	0.146	0.012	0.02152	0.00056	0.044579	0.0505	0.0044	137.2	3.5	138	11	90	160	137.2	3.5	-52.4444	0.57971
	W1_DZ_UGR_124	213.8	128.1	0.594	0.154	0.013	0.02242	0.00073	0.13102	0.053	0.0045	142.9	4.6	145	11	240	170	142.9	4.6	40.4583	1.44828
	W1_DZ_UGR_116	236.6	128.9	0.5414	0.1603	0.0092	0.0235	0.00047	-0.034808	0.0507	0.0032	149.7	2.9	149.9	8	150	120	149.7	2.9	0.2	0.133422
	W1_DZ_UGR_69	72.4	102.1	1.415	0.183	0.011	0.02422	0.00055	0.044115	0.0549	0.0035	154.3	3.5	169	9.7	340	130	154.3	3.5	54.6176	8.69822
	W1_DZ_UGR_54	265.7	178.9	0.675	0.1644	0.0061	0.02426	0.00034	0.1578	0.0485	0.0018	154.5	2.1	153.9	5.3	111	77	154.5	2.1	-39.1892	-0.389864
	W1_DZ_UGR_150	76.3	60.8	0.836	0.168	0.014	0.0243	0.00065	0.039607	0.051	0.0043	154.7	4.1	155	12	120	160	154.7	4.1	-28.9167	0.193548
	W1_DZ_UGR_64	428	226.6	0.543	0.1753	0.0069	0.02458	0.00031	0.099037	0.0523	0.0021	156.5	1.9	164.2	5.8	246	85	156.5	1.9	36.3821	4.6894
	W1_DZ_UGR_140	352.6	160.7	0.4488	0.1816	0.0087	0.02641	0.0006	0.14603	0.0502	0.0026	168	3.8	169.6	7.7	170	110	168	3.8	1.17647	0.943396
	W1_DZ_UGR_96	1174	727	0.6221	0.1837	0.0041	0.02676	0.00024	0.12235	0.05	0.001	170.2	1.5	171.1	3.5	181	46	170.2	1.5	5.96685	0.526008
	W1_DZ_UGR_62	374.9	179.2	0.4766	0.1874	0.0064	0.02778	0.00035	-0.032525	0.0489	0.0018	176.6	2.2	173.8	5.5	114	74	176.6	2.2	-54.9123	-1.61105
	W1_DZ_UGR_128	860.4	445.8	0.5119	0.1906	0.0051	0.02793	0.00042	0.19576	0.0496	0.0015	177.6	2.6	176.9	4.3	155	65	177.6	2.6	-14.5806	-0.395704
	W1_DZ_UGR_26	249	125.8	0.509	0.215	0.013	0.02832	0.00076	0.40869	0.0545	0.003	180	4.7	197	11	340	120	180	4.7	47.0588	8.62944
	W1_DZ_UGR_122	1123	724	0.641	0.2014	0.006	0.02882	0.00042	0.19983	0.0517	0.0015	183.2	2.6	186	5.1	261	64	183.2	2.6	29.8084	1.50538
	W1_DZ_UGR_149	168.3	141.7	0.844	0.207	0.011	0.02998	0.00058	0.10528	0.0515	0.0026	190.4	3.6	191.4	9.3	220	110	190.4	3.6	13.4545	0.522466
	W1_DZ_UGR_67	1094	463.4	0.426	0.2164	0.0088	0.03017	0.00049	0.3377	0.052	0.002	191.6	3.1	198.5	7.3	257	84	191.6	3.1	25.4475	3.47607
	W1_DZ_UGR_39	847	301	0.3626	0.2238	0.0062	0.03206	0.00034	0.13334	0.0508	0.0015	203.4	2.1	204.5	5.1	203	61	203.4	2.1	-0.197044	0.537897
	W1_DZ_UGR_120	225	179	0.788	0.2451	0.0097	0.03504	0.00059	0.05477	0.0508	0.0021	222	3.6	221.6	7.9	202	86	222	3.6	-9.90099	-0.180505
	W1_DZ_UGR_56	105.5	54.3	0.549	0.265	0.014	0.03707	0.00064	-0.033933	0.0524	0.003	234.6	4	236	11	200	110	234.6	4	-17.3	0.59322
	W1_DZ_UGR_147	112.1	62.4	0.634	0.262	0.018	0.03742	0.00094	0.16815	0.0506	0.0035	236.8	5.8	233	15	150	140	236.8	5.8	-57.8667	-1.6309
	W1_DZ_UGR_27	160.9	74.8	0.4633	0.265	0.018	0.03749	0.00085	-0.10086	0.0522	0.0039	237.2	5.3	237	15	200	150	237.2	5.3	-18.6	-0.0843882
	W1_DZ_UGR_121	367	196.7	0.5304	0.27	0.012	0.03799	0.00062	0.079481	0.052	0.0022	240.3	3.8	241.8	9.3	240	91	240.3	3.8	-0.125	0.620347
	W1_DZ_UGR_8	69.8	39.6	0.566	0.279	0.02	0.03851	0.00082	0.13076	0.0527	0.0037	243.5	5.1	245	15	200	140	243.5	5.1	-21.75	0.612245
	W1_DZ_UGR_66	319	161.8	0.521	0.2787	0.009	0.03884	0.00048	-0.052092	0.0519	0.0017	245.6	3	248.6	7.1	257	70	245.6	3	4.4358	1.20676
	W1_DZ_UGR_143	110.2	101	0.833	0.254	0.017	0.03918	0.00096	0.37765	0.0488	0.0029	247.7	6	227	14	90	110	247.7	6	-175.222	-9.11894
	W1_DZ_UGR_20	168.6	105.3	0.6292	0.279	0.011	0.03926	0.00056	0.05041	0.0519	0.0022	248.2	3.5	248.5	8.8	225	87	248.2	3.5	-10.3111	0.120724
	W1_DZ_UGR_14	319	162.7	0.554	0.2796	0.0076	0.03949	0.00049	0.052798	0.0513	0.0015	249.7	3.1	250.3	6.2	230	65	249.7	3.1	-8.56522	0.239712
	W1_DZ_UGR_132	265	156.8	0.614	0.291	0.012	0.04022	0.00073	0.10319	0.0526	0.0021	254.2	4.6	257.9	9.1	277	88	254.2	4.6	8.23105	1.43466
	W1_DZ_UGR_144	128.7	91.1	0.7018	0.288	0.018	0.04022	0.00098	0.095241	0.0538	0.0032	254.2	6.1	254	14	300	130	254.2	6.1	15.2667	-0.0787402
	W1_DZ_UGR_11	253.9	184.9	0.7169	0.2894	0.009	0.04026	0.00042	0.13631	0.0521	0.0016	254.4	2.6	257.1	7.1	262	68	254.4	2.6	2.90076	1.05018
	W1_DZ_UGR_103	296	209	0.6839	0.2849	0.0098	0.04045	0.0005	0.14217	0.0514	0.0017	255.6	3.1	253.3	7.7	233	69	255.6	3.1	-9.69957	-0.908014
	W1_DZ_UGR_73	235	147.1	0.772	0.2933	0.0098	0.04067	0.00052	0.18092	0.0524	0.0018	256.9	3.2	259.9	7.7	258	72	256.9	3.2	0.426357	1.15429
	W1_DZ_UGR_30	724	196.1	0.2679	0.294	0.013	0.04081	0.00079	-0.086203	0.0515	0.0024	257.9	4.9	260.8	9.8	250	100	257.9	4.9	-3.16	1.11196
	W1_DZ_UGR_104	408	278	0.6719	0.2939	0.0086	0.0411	0.00047	-0.0043632	0.0519	0.0014	259.6	2.9	260.8	6.7	258	58	259.6	2.9	-0.620155	0.460123
	W1_DZ_UGR_139	226.8	259.3	1.12	0.2924	0.0089	0.04129	0.0007	0.17195	0.0514	0.0019	260.8	4.3	259.7	7	226	76	260.8	4.3	-15.3982	-0.423566
	W1_DZ_UGR_106	328.1	200.6	0.62	0.354	0.014	0.04137	0.0005	0.22159	0.062	0.0022	261.3	3.1	306	10	618	78	261.3	3.1	57.7184	14.6078
	W1_DZ_UGR_60	188.7	1297	7.02	0.3331	0.0061	0.04197	0.00039	0.23254	0.0571	0.0011	265	2.4	291.8	4.6	486	42	265	2.4	45.4733	9.18437
	W1_DZ_UGR_80	158.9	175.3	1.097	0.317	0.016	0.042	0.00089	0.26041	0.0542	0.0027	265.2	5.5	278	12	360	110	265.2	5.5	26.3333	4.60432
	W1_DZ_UGR_152	446	193	0.4427	0.298	0.011	0.04227	0.00078	0.095904	0.0515	0.0019	266.9	4.8	263.4	8.3	236	82	266.9	4.8	-13.0932	-1.32878
	W1_DZ_UGR_6	776	701	0.922	0.3102	0.0059	0.04246	0.00048	0.27273	0.05293	0.00097	268	3	274.8	4.4	313	42	268	3	14.377	2.47453
	W1_DZ_UGR_82	396	234	0.752	0.308	0.012	0.04259	0.00068	0.24282	0.0522	0.002	269.5	4.4	271.9	9.4	269	83	269.5	4.4	-0.185874	0.882677
	W1_DZ_UGR_48	615	297	0.501	0.309	0.012	0.04281	0.00066	0.20123	0.0521	0.002	270.2	4.1	272.8	9.3	287	93	270.2	4.1	5.85366	0.953079
	W1_DZ_UGR_113	228.3	133.2	0.5845	0.308	0.016	0.0429	0.00079	0.088991	0.0526	0.0027	270.8	4.9	272	12	250	110	270.8	4.9	-8.32	0.441176
	W1_DZ_UGR_46	477	304	0.6434	0.3115	0.0068	0.04328	0.00043	0.12267	0.0522	0.0012	273.1	2.6	274.8	5.2	273	49	273.1	2.6	-0.03663	0.618632
	W1_DZ_UGR_95	242	186	0.773	0.316	0.013	0.04333	0.00078	0.14169	0.0533	0.0023	273.4	4.8	277.6	10	297	94	273.4	4.8	7.94613	1.51297
	W1_DZ_UGR_57	298	272.5	0.916	0.3432	0.0073	0.04354	0.00047	0.29622	0.0571	0.0012	274.7	2.9	299	5.5	470	47	274.7	2.9	41.5532	8.12709
	W1_DZ_UGR_17	235.3	262.9	1.1026	0.3144	0.0069	0.0437	0.00046	-0.0029642	0.052	0.0012	275.7	2.8	277	5.4	265	52	275.7	2.8	-4.03774	0.469314
	W1_DZ_UGR_5	573	393	0.709	0.3163	0.0068	0.04425	0.00043	0.038458	0.0515	0.0011	279.1	2.7	278.5	5.2	248	46	279.1	2.7	-12.5403	-0.21544
	W1_DZ_UGR_12	257.4	332.2	1.318	0.3167	0.0088	0.04432	0.0005	0.12007	0.052	0.0015	279.6	3.1	279.7	6.6	263	62	279.6	3.1	-6.31179	0.0357526
	W1_DZ_UGR_99	592	385	0.638	0.3176	0.0085	0.04453	0.00043	0.25492	0.0517	0.0012	280.8	2.6	279.3	6.6	254	51	280.8	2.6	-10.5512	-0.537057
	W1_DZ_UGR_136	282	191.7	0.656	0.324	0.012	0.04455	0.00073	-0.057819	0.0531	0.002	280.9	4.5	283.7	8.9	290	79	280.9	4.5	3.13793	0.986958
	W1_DZ_UGR_25	2287	1450	0.6296	0.3776	0.0058	0.04481	0.00053	0.54034	0.06073	0.00081	282.5	3.3	325.1	4.2	622	29	282.5	3.3	54.582	13.1037
	W1_DZ_UGR_7	872	522	0.5941	0.3257	0.0055	0.04498	0.00035	-0.0042528	0.05285	0.00097	283.6	2.2	286.6	4.3	306	41	283.6	2.2	7.32026	1.04676
	W1_DZ_UGR_138	158	175.9	1.096	0.338	0.017	0.04591	0.00092	0.21012	0.0551	0.0026	289.3	5.7	294	13	364	100	289.3	5.7	20.522	1.59864
	W1_DZ_UGR_134	380	1268	3.251	0.3313	0.0057	0.04596	0.00063	0.28705	0.05223	0.00096	289.7	3.9	290.3	4.3	285	42	289.7	3.9	-1.64912	0.206683
	W1_DZ_UGR_109	684	527	0.758	0.3355	0.0072	0.0471	0.00054	0.22788	0.05188	0.00098	296.7	3.3	293.2	5.5	262	42	296.7	3.3	-13.2443	-1.19372
	W1_DZ_UGR_75	206	114.3	0.5511	0.341	0.011	0.04742	0.00061	0.035975	0.0522	0.0018	298.6	3.8	296.6	8.4	257	72	298.6	3.8	-16.1868	-0.674309
	W1_DZ_UGR_141	454	163	0.3584	0.349	0.012	0.04818	0.00094	0.21284	0.0526	0.002	303.2	5.8	302.6	9.4	280	82	303.2	5.8	-8.28571	-0.198282
	W1_DZ_UGR_23	962	905	0.9348	0.3515	0.0044	0.04832	0.00042	0.2037	0.05265	0.00068	304.2	2.6	305.7	3.3	303	29	304.2	2.6	-0.39604	0.490677
	W1_DZ_UGR_129	473	218.7	0.4577	0.352	0.012	0.04878	0.0007	0.078799	0.0521	0.0016	307	4.3	306.5	8.6	270	69	307	4.3	-13.7037	-0.163132
	W1_DZ_UGR_137	645	297	0.4533	0.354	0.011	0.04885	0.00069	0.26451	0.0513	0.0015	307.4	4.2	307	8.1	240	67	307.4	4.2	-28.0833	-0.130293
	W1_DZ_UGR_68	466	317	0.7075	0.3691	0.0084	0.05062	0.00057	0.22162	0.0528	0.0012	318.3	3.5	319	6.3	302	49	318.3	3.5	-5.39735	0.219436
	W1_DZ_UGR_38	2082	927	0.454	0.4006	0.0069	0.05134	0.00066	0.34379	0.05715	0.00098	322.7	4	341.8	5	488	37	322.7	4	33.873	5.58806
	W1_DZ_UGR_36	768	431.2	0.5608	0.392	0.009	0.05208	0.00049	0.21968	0.0549	0.0012	327.2	3	335.3	6.5	387	50	327.2	3	15.4522	2.41575
	W1_DZ_UGR_32	158	118.5	0.7477	0.379	0.011	0.0522	0.00068	0.12379	0.0529	0.0016	328	4.1	326.2	8.6	289	67	328	4.1	-13.4948	-0.551809
	W1_DZ_UGR_22	701	512	0.7329	0.3866	0.007	0.05223	0.00051	0.34677	0.05382	0.00092	328.2	3.1	331.5	5.1	349	38	328.2	3.1	5.95989	0.995475
	W1_DZ_UGR_117	263.4	194.4	0.733	0.383	0.012	0.0528	0.00066	0.12301	0.0526	0.0017	331.6	4	328.2	9	279	72	331.6	4	-18.853	-1.03595
	W1_DZ_UGR_130	406	191.1	0.4633	0.392	0.015	0.0528	0.0011	0.17902	0.056	0.0022	331.7	6.8	334	11	412	85	331.7	6.8	19.4903	0.688623
	W1_DZ_UGR_115	329.8	271.4	0.828	0.393	0.017	0.05327	0.00077	0.18506	0.0553	0.0022	334.5	4.7	337	13	384	85	334.5	4.7	12.8906	0.74184
	W1_DZ_UGR_76	251.6	204.8	0.8097	0.3955	0.0091	0.05335	0.00053	0.060727	0.0538	0.0013	335	3.3	337.5	6.7	336	55	335	3.3	0.297619	0.740741
	W1_DZ_UGR_50	249.9	143.4	0.5735	0.394	0.01	0.05358	0.00058	0.18669	0.0537	0.0014	336.4	3.5	337.2	7.6	332	57	336.4	3.5	-1.3253	0.237248
	W1_DZ_UGR_51	258.4	135.3	0.5244	0.398	0.011	0.0536	0.00062	0.098112	0.0539	0.0016	336.5	3.8	338.5	8.3	334	63	336.5	3.8	-0.748503	0.590842
	W1_DZ_UGR_65	575.1	542.3	0.949	0.3999	0.0059	0.05359	0.00044	0.27269	0.05411	0.00077	336.5	2.7	341.3	4.3	364	32	336.5	2.7	7.55495	1.40639
	W1_DZ_UGR_35	509	219.1	0.4312	0.3951	0.0094	0.05374	0.00063	0.14451	0.0534	0.0012	337.4	3.8	337.9	6.7	323	52	337.4	3.8	-4.4582	0.147973
	W1_DZ_UGR_127	391.1	257.3	0.65	0.401	0.012	0.05466	0.0008	0.13395	0.053	0.0016	343	4.9	341.1	8.6	310	66	343	4.9	-10.6452	-0.557021
	W1_DZ_UGR_100	442	903	2.13	0.4104	0.008	0.05505	0.00056	0.011311	0.0545	0.00073	345.4	3.4	348.6	5.9	381	30	345.4	3.4	9.34383	0.917958
	W1_DZ_UGR_112	576	407	0.712	0.4197	0.0094	0.0556	0.00062	0.23148	0.0553	0.0012	348.8	3.8	356	6.9	402	47	348.8	3.8	13.2338	2.02247
	W1_DZ_UGR_91	725	883	1.2074	0.412	0.0053	0.05561	0.00042	0.20057	0.05416	0.00069	348.9	2.6	350	3.8	370	28	348.9	2.6	5.7027	0.314286
	W1_DZ_UGR_93	742	1086	1.546	0.4147	0.0077	0.05562	0.00079	-0.69645	0.05462	0.0008	348.9	4.8	351.7	5.6	398	28	348.9	4.8	12.3367	0.796133
	W1_DZ_UGR_101	227.4	168.9	0.7383	0.413	0.013	0.05578	0.00066	0.17532	0.0544	0.0015	349.9	4	350	9.1	351	61	349.9	4	0.31339	0.0285714
	W1_DZ_UGR_2	1837	1096	0.614	0.4448	0.0077	0.05672	0.0005	0.33437	0.05702	0.00094	355.6	3	373.3	5.4	483	37	355.6	3	26.3768	4.74149
	W1_DZ_UGR_74	413	325	0.789	0.423	0.011	0.05703	0.00069	0.29107	0.0542	0.0014	357.5	4.2	357.5	7.6	358	56	357.5	4.2	0.139665	0
	W1_DZ_UGR_77	865	786	0.917	0.4722	0.0066	0.05851	0.0005	0.38441	0.05855	0.00075	366.6	3.1	392.4	4.6	540	28	366.6	3.1	32.1111	6.57492
	W1_DZ_UGR_59	244	392.6	1.606	0.4445	0.0084	0.0591	0.00056	0.11474	0.0543	0.001	370.1	3.4	372.9	5.9	370	43	370.1	3.4	-0.027027	0.750872
	W1_DZ_UGR_10	289	447	1.56	0.4816	0.0083	0.06365	0.00051	0.22362	0.05471	0.00091	397.8	3.1	398.5	5.7	382	37	397.8	3.1	-4.13613	0.175659
	W1_DZ_UGR_43	280	300.8	1.122	0.4877	0.0086	0.06429	0.00055	0.41393	0.05506	0.00093	401.6	3.3	402.7	5.8	396	38	401.6	3.3	-1.41414	0.273156
	W1_DZ_UGR_79	157.2	90.9	0.5775	0.516	0.019	0.0683	0.001	0.14808	0.0552	0.002	425.8	6.3	420	12	367	79	425.8	6.3	-16.0218	-1.38095
	W1_DZ_UGR_98	1161	635	0.5443	0.613	0.013	0.07699	0.00097	0.46195	0.0574	0.0011	478.1	5.8	484.9	8	495	43	478.1	5.8	3.41414	1.40235
	W1_DZ_UGR_29	-0.000112114	24.25	-214700	0.637	0.036	0.0802	0.0018	0.20741	0.0585	0.0034	497	11	497	23	430	120	497	11	-15.5814	0
	W1_DZ_UGR_19	345	278.6	0.811	0.672	0.015	0.08285	0.00089	0.2925	0.0588	0.0012	513	5.3	521.2	8.8	548	45	513	5.3	6.38686	1.57329
	W1_DZ_UGR_40	21.32	276.3	13.07	0.714	0.013	0.08866	0.00087	0.28733	0.0586	0.001	547.5	5.1	546.2	7.9	532	39	547.5	5.1	-2.91353	-0.238008
	W1_DZ_UGR_133	109	799	31.8	0.728	0.021	0.0891	0.0016	0.73092	0.059	0.0011	550	9.2	553	12	562	38	550	9.2	2.13523	0.542495
	W1_DZ_UGR_131	34.5	50.2	1.462	1.89	0.053	0.1807	0.0031	0.16637	0.0762	0.0023	1070	17	1072	19	1074	62	1074	62	0.372439	0.186567
	W1_DZ_UGR_90	558	827	1.472	1.765	0.018	0.1713	0.0014	0.47248	0.07535	0.00065	1019.1	7.8	1032.4	6.4	1075	17	1075	17	5.2	1.28826
	W1_DZ_UGR_47	307.5	392.9	1.279	2.074	0.029	0.1927	0.002	0.38987	0.0789	0.001	1136	11	1139.4	9.5	1164	26	1164	26	2.4055	0.298403
	W1_DZ_UGR_49	400	335.6	0.865	2.185	0.027	0.1992	0.0015	0.38027	0.08013	0.00086	1171.1	8.1	1175.3	8.5	1194	21	1194	21	1.91792	0.357356
	W1_DZ_UGR_61	252	207	0.843	2.326	0.034	0.1982	0.0015	0.18438	0.0855	0.0014	1165.5	8.3	1218.6	10	1314	31	1314	31	11.3014	4.35746
	W1_DZ_UGR_125	385	499	1.4	3.504	0.079	0.2676	0.0046	0.64738	0.09436	0.0015	1528	23	1523	19	1511	29	1511	29	-1.12508	-0.328299
	W1_DZ_UGR_63	274	731	2.89	3.207	0.027	0.2441	0.0018	0.51753	0.09528	0.00066	1408	9.4	1458.5	6.5	1531	13	1531	13	8.03396	3.46246
	W1_DZ_UGR_107	540	565	1.09	3.675	0.053	0.2752	0.0022	0.63265	0.09589	0.00085	1567	11	1564.3	11	1543	17	1543	17	-1.55541	-0.172601
	W1_DZ_UGR_33	309	426	1.423	3.625	0.034	0.2719	0.0023	0.70346	0.0963	0.00069	1550	12	1554.1	7.5	1553	13	1553	13	0.193175	0.263818
	W1_DZ_UGR_81	242.5	670.5	2.745	3.449	0.027	0.2609	0.0018	0.50504	0.09642	0.00061	1494.2	9.3	1515.1	6.1	1554	12	1554	12	3.84813	1.37945
	W1_DZ_UGR_16	625.7	453.1	0.7148	3.561	0.035	0.2685	0.0023	0.45997	0.09658	0.00084	1533	12	1540.4	7.8	1556	16	1556	16	1.47815	0.480395
	W1_DZ_UGR_15	399.2	315.5	0.7804	3.659	0.034	0.2744	0.0019	0.36162	0.09668	0.00079	1562.8	9.7	1561.8	7.5	1557	15	1557	15	-0.372511	-0.0640287
	W1_DZ_UGR_21	384.5	308.7	0.7946	3.538	0.033	0.2658	0.002	0.434	0.09688	0.00079	1519.3	10	1535.1	7.3	1564	15	1564	15	2.85806	1.02925
	W1_DZ_UGR_37	667	210.8	0.3156	3.654	0.06	0.273	0.003	0.45572	0.0981	0.0014	1556	15	1560	13	1583	27	1583	27	1.70562	0.25641
	W1_DZ_UGR_34	2.83	4.95	1.83	3.97	0.22	0.2839	0.0095	0.48485	0.1029	0.0054	1603	48	1604	50	1584	97	1584	97	-1.19949	0.0623441
	W1_DZ_UGR_118	312	113.6	0.398	3.843	0.072	0.2816	0.0034	0.22063	0.0985	0.002	1599	17	1598	15	1585	37	1585	37	-0.883281	-0.0625782
	W1_DZ_UGR_87	245.6	127.8	0.5173	3.723	0.048	0.2761	0.0024	0.3756	0.0983	0.0011	1571	12	1574.7	10	1589	21	1589	21	1.13279	0.234965
	W1_DZ_UGR_85	415.7	319.9	0.7639	3.493	0.041	0.2521	0.0025	0.46459	0.101	0.0011	1449	13	1524.9	9.2	1641	20	1641	20	11.7002	4.97738
	W1_DZ_UGR_92	743	588	0.7839	3.551	0.036	0.2556	0.0021	0.51688	0.10178	0.00088	1467	11	1538	8	1656	17	1656	17	11.413	4.61638
	W1_DZ_UGR_84	554	198.7	0.363	3.708	0.052	0.2631	0.0028	0.52414	0.1022	0.0012	1505	14	1572	11	1661	21	1661	21	9.39193	4.26209
	W1_DZ_UGR_110	155	126.6	0.799	4.927	0.1	0.3285	0.0041	0.5549	0.1067	0.0017	1830	20	1805	17	1744	27	1744	27	-4.93119	-1.38504
	W1_DZ_UGR_105	291	253	0.924	4.736	0.07	0.3159	0.0027	0.49052	0.10852	0.001	1769	13	1772	13	1771	18	1771	18	0.112931	0.1693
	W1_DZ_UGR_89	106.2	74.3	0.694	4.678	0.079	0.315	0.0031	0.23773	0.1089	0.002	1765	15	1764	15	1780	32	1780	32	0.842697	-0.0566893
	W1_DZ_UGR_53	1204	861	0.725	4.545	0.043	0.3016	0.0025	0.6391	0.10958	0.00072	1699	12	1738.7	7.8	1790	12	1790	12	5.0838	2.28332
	W1_DZ_UGR_28	697	389	0.5585	5.192	0.051	0.3321	0.0028	0.6642	0.11371	0.00078	1848	13	1850.4	8.4	1857	12	1857	12	0.484653	0.129702
	W1_DZ_UGR_1	569	329	0.5944	5.158	0.048	0.3304	0.003	0.50809	0.11418	0.00093	1840	15	1845.9	7.7	1864	15	1864	15	1.28755	0.319627
	W1_DZ_UGR_18	330.8	271.3	0.8122	4.823	0.058	0.3035	0.0028	0.49648	0.1142	0.0012	1711	15	1788.3	10	1865	19	1865	19	8.25737	4.32254
	W1_DZ_UGR_52	410	352.7	0.8627	5.126	0.048	0.3248	0.0026	0.40224	0.11521	0.00099	1813	12	1840.8	8.2	1880	16	1880	16	3.56383	1.51021
	W1_DZ_UGR_86	288	264.4	0.9064	5.42	0.062	0.3408	0.0036	0.62595	0.1159	0.0011	1890	17	1886.8	9.9	1890	17	1890	17	0	-0.169599
	W1_DZ_UGR_72	268	113.7	0.4224	5.411	0.077	0.3378	0.0029	0.41761	0.117	0.0015	1876	14	1885	12	1905	22	1905	22	1.52231	0.477454
	W1_DZ_UGR_41	110.6	1203	10.894	5.961	0.042	0.338	0.0021	0.66061	0.12855	0.00059	1876.7	10	1969.7	6.2	2076.7	8	2076.7	8	9.63066	4.72153
	W1_DZ_UGR_24	178.9	115.4	0.6427	13.25	0.17	0.5195	0.0059	0.64824	0.1855	0.0017	2696	25	2697	12	2703	16	2703	16	0.258972	0.0370782
	W1_DZ_UGR_70	242.2	204.6	0.8417	13.011	0.1	0.5064	0.0036	0.63279	0.1866	0.001	2641	15	2679.8	7.3	2711.6	9	2711.6	9	2.60363	1.44787
	U-Pb LA-ICPMS detrital zircon data
	Sample Location: GSQ Normanton 1 Well, Queensland (sample name: 101018-34; Normanton, Queensland)
	Formation: Normanton Formation
	Sample #	Th (PPM)	U (PPM)	Th/U	Pb207	±	Pb206	±	Error	Pb207	±	Pb206	± 2σ	Pb207	± 2σ	Pb207	± 2σ	Preferred	± 2σ	Pb-Pb/U-Pb Discordance (%)	U-Pb/U-Pb Discordance (%)
	101018-34				/U235	2σ	/U238	2σ	Corr.	/Pb206	2σ	/U238 (Ma)	(Ma)	/U235	(Ma)	/Pb206	(Ma)	Age	(Ma)
	101018_34_96	136.7	155.2	1.174	0.0998	0.0073	0.01504	0.0004	-0.037796	0.048	0.0037	96.2	2.5	95.9	6.7	50	150	96.2	2.5	-92.4	-0.312826
	101018_34_97	125.5	124.2	1.022	0.106	0.0084	0.01505	0.00051	0.034527	0.0516	0.0042	96.3	3.2	101.5	7.7	170	160	96.3	3.2	43.3529	5.12315
	101018_34_98	144.8	126.4	0.8918	0.1017	0.008	0.01502	0.00041	-0.046175	0.0499	0.0042	96.4	2.7	97.5	7.4	90	160	96.4	2.7	-7.11111	1.12821
	101018_34_72	87.5	65.8	0.749	0.1	0.012	0.01519	0.00056	0.075757	0.0481	0.0055	97.2	3.6	95	11	-50	200	97.2	3.6	294.4	-2.31579
	101018_34_47	433	234.6	0.554	0.1028	0.0064	0.01543	0.00037	0.026414	0.0478	0.0031	98.7	2.3	98.8	5.9	60	130	98.7	2.3	-64.5	0.101215
	101018_34_7	286	182.4	0.6323	0.1026	0.0062	0.01546	0.00041	0.061025	0.0495	0.0033	98.9	2.6	100.3	6	90	130	98.9	2.6	-9.88889	1.39581
	101018_34_48	191.4	80	0.4153	0.105	0.012	0.01547	0.00057	0.13439	0.0492	0.0055	98.9	3.6	100	11	-10	200	98.9	3.6	1089	1.1
	101018_34_37	635	387	0.609	0.1013	0.005	0.01543	0.00034	0.40295	0.0474	0.0021	99	2.2	97.6	4.6	51	91	99	2.2	-94.1176	-1.43443
	101018_34_12	136.8	137.2	0.998	0.1003	0.0077	0.0155	0.00048	0.022135	0.0469	0.0038	99.2	3	96.2	7.1	10	150	99.2	3	-892	-3.1185
	101018_34_8	58.6	47.3	0.811	0.107	0.013	0.01553	0.00066	-0.019864	0.052	0.0066	99.3	4.2	101	12	70	240	99.3	4.2	-41.8571	1.68317
	101018_34_44	167.4	102.4	0.6163	0.1075	0.0094	0.01553	0.00053	-0.068252	0.0514	0.0048	99.3	3.3	102.6	8.6	130	180	99.3	3.3	23.6154	3.21637
	101018_34_88	107.3	92.5	0.887	0.1052	0.0093	0.01552	0.0005	-0.11181	0.0516	0.005	99.3	3.2	101.5	8.8	100	180	99.3	3.2	0.7	2.16749
	101018_34_70	136.7	115.3	0.829	0.1106	0.0095	0.01557	0.00051	0.010145	0.052	0.0047	99.6	3.2	105.5	8.7	150	170	99.6	3.2	33.6	5.59242
	101018_34_84	151.3	114.2	0.748	0.106	0.0083	0.01559	0.00046	0.0007403	0.0503	0.0042	99.7	2.9	101.4	7.6	80	160	99.7	2.9	-24.625	1.67653
	101018_34_75	106	84	0.985	0.098	0.015	0.01563	0.00059	-0.025993	0.0448	0.0068	100	3.8	95	14	-130	260	100	3.8	176.923	-5.26316
	101018_34_9	392.3	166.8	0.4218	0.1003	0.0071	0.0157	0.00044	-0.144	0.0481	0.0039	100.4	2.8	96.5	6.6	40	150	100.4	2.8	-151	-4.04145
	101018_34_28	81.2	78.5	0.966	0.103	0.01	0.01569	0.00048	0.095951	0.0486	0.0049	100.4	3	98.5	9.2	-10	180	100.4	3	1104	-1.92893
	101018_34_40	200.5	243.5	1.209	0.1043	0.0054	0.01572	0.00037	0.087996	0.0485	0.0026	100.5	2.3	100.4	5	80	110	100.5	2.3	-25.625	-0.0996016
	101018_34_13	40.14	37.47	0.927	0.101	0.017	0.01575	0.00081	-0.1215	0.0492	0.0086	100.7	5.1	95	15	-110	300	100.7	5.1	191.545	-6
	101018_34_99	88.4	79.4	0.931	0.1082	0.0097	0.01575	0.00052	-0.048413	0.0514	0.0051	100.7	3.3	103.1	8.8	80	180	100.7	3.3	-25.875	2.32784
	101018_34_93	161.3	136.4	0.901	0.1058	0.0091	0.01589	0.00043	-0.15135	0.0495	0.0045	101.6	2.7	101.1	8.3	70	170	101.6	2.7	-45.1429	-0.49456
	101018_34_74	71.3	46.26	0.645	0.11	0.013	0.01592	0.00063	-0.0080726	0.0526	0.0064	101.8	4	104	11	90	220	101.8	4	-13.1111	2.11538
	101018_34_35	483	497	1.046	0.1054	0.0047	0.01593	0.00031	0.17742	0.0479	0.0021	101.9	2	101.5	4.3	70	89	101.9	2	-45.5714	-0.394089
	101018_34_65	99.8	100	0.994	0.1069	0.0098	0.01593	0.00049	0.058666	0.0493	0.0047	101.9	3.1	101.9	8.9	40	180	101.9	3.1	-154.75	0
	101018_34_56	186	110.6	0.594	0.113	0.01	0.01599	0.00059	0.018685	0.0525	0.005	102.3	3.8	107.6	9.2	170	180	102.3	3.8	39.8235	4.92565
	101018_34_3	430	245.4	0.578	0.1108	0.006	0.01601	0.00035	0.032469	0.0507	0.0028	102.4	2.2	106.3	5.5	170	110	102.4	2.2	39.7647	3.66886
	101018_34_26	140.2	118.8	0.837	0.1052	0.0084	0.01604	0.00053	0.252	0.0478	0.0038	102.6	3.4	100.7	7.7	20	150	102.6	3.4	-413	-1.88679
	101018_34_58	199.9	176	0.869	0.1127	0.0075	0.01605	0.00044	0.13951	0.0515	0.0035	102.6	2.8	107.7	6.8	160	130	102.6	2.8	35.875	4.73538
	101018_34_5	91.1	86.3	0.934	0.111	0.011	0.01607	0.00059	0.096209	0.0515	0.0051	102.7	3.7	106.2	9.6	120	190	102.7	3.7	14.4167	3.29567
	101018_34_18	347.9	293.7	0.843	0.1144	0.0081	0.01612	0.00043	0.23585	0.0525	0.0037	103.1	2.8	109.5	7.3	220	140	103.1	2.8	53.1364	5.84475
	101018_34_6	2105	767	0.369	0.1064	0.0039	0.01616	0.0003	0.32735	0.0476	0.0016	103.4	1.9	102.5	3.6	79	71	103.4	1.9	-30.8861	-0.878049
	101018_34_45	184.7	144.3	0.778	0.12	0.0089	0.01623	0.00053	-0.057295	0.0547	0.0044	103.8	3.4	114.4	8.1	290	160	103.8	3.4	64.2069	9.26573
	101018_34_68	119.3	91.1	0.767	0.0998	0.0094	0.01629	0.00057	-0.017912	0.0449	0.0043	104.1	3.6	96.6	8.8	-90	170	104.1	3.6	215.667	-7.76398
	101018_34_77	176.4	220.5	1.243	0.1129	0.0063	0.0163	0.0004	-0.084415	0.0501	0.003	104.2	2.6	108.2	5.7	180	130	104.2	2.6	42.1111	3.69686
	101018_34_53	114.2	187.1	1.634	0.1064	0.0066	0.01637	0.0004	0.09466	0.0476	0.003	104.6	2.5	102.1	6	60	120	104.6	2.5	-74.3333	-2.44858
	101018_34_2	138.5	121	0.927	0.1059	0.0085	0.01637	0.00055	-0.11635	0.0485	0.0044	104.7	3.5	101.4	7.8	40	170	104.7	3.5	-161.75	-3.25444
	101018_34_21	84.3	86.1	1.013	0.1049	0.0094	0.01641	0.00054	0.11728	0.0479	0.0044	104.9	3.4	101.3	8.8	-10	170	104.9	3.4	1149	-3.5538
	101018_34_11	183.3	146.1	0.794	0.116	0.012	0.01643	0.00068	0.035392	0.0521	0.0056	105	4.3	110	11	170	210	105	4.3	38.2353	4.54545
	101018_34_29	165.4	124	0.742	0.106	0.0085	0.01655	0.00046	-0.092652	0.0475	0.0041	105.8	2.9	101.4	7.8	-10	160	105.8	2.9	1158	-4.33925
	101018_34_34	290	237.4	0.813	0.1114	0.0064	0.01657	0.00043	0.022999	0.0495	0.003	105.9	2.7	106.7	5.8	100	120	105.9	2.7	-5.9	0.749766
	101018_34_92	115.5	78.2	0.6841	0.1105	0.0098	0.01658	0.00059	-0.035611	0.0487	0.0046	106	3.7	105.4	9	70	190	106	3.7	-51.4286	-0.56926
	101018_34_85	2338	1500	0.6294	0.114	0.0036	0.01665	0.00032	0.39947	0.0494	0.0014	106.5	2.1	109.5	3.3	156	62	106.5	2.1	31.7308	2.73973
	101018_34_25	234	102.3	0.442	0.114	0.012	0.01672	0.00062	0.0099084	0.0517	0.0057	106.9	3.9	110	11	110	200	106.9	3.9	2.81818	2.81818
	101018_34_57	140.3	113.6	0.8	0.109	0.0094	0.01673	0.00058	0.2633	0.0475	0.004	107	3.7	104	8.5	0	160	107	3.7	#DIV/0!	-2.88462
	101018_34_62	309.9	379.3	1.219	0.1137	0.0053	0.01678	0.00033	-0.014507	0.0494	0.0024	107.3	2.1	109	4.8	124	99	107.3	2.1	13.4677	1.55963
	101018_34_33	169.3	153.5	0.894	0.12	0.011	0.01682	0.00061	0.0091474	0.0527	0.0048	107.5	3.9	114.6	9.9	260	190	107.5	3.9	58.6538	6.19546
	101018_34_67	204.9	144.5	0.711	0.1071	0.0084	0.01682	0.00048	0.16979	0.0459	0.0035	107.5	3	102.5	7.6	-40	140	107.5	3	368.75	-4.87805
	101018_34_78	137.7	143	1.024	0.1128	0.0083	0.0169	0.00046	0.052387	0.0484	0.0037	108	2.9	107.7	7.6	50	140	108	2.9	-116	-0.278552
	101018_34_63	246.5	274.8	1.103	0.1152	0.0061	0.01712	0.00038	0.11906	0.049	0.0026	109.4	2.4	110.3	5.6	110	110	109.4	2.4	0.545455	0.815956
	101018_34_80	163.1	201.3	1.219	0.1205	0.0079	0.01714	0.00043	-0.10203	0.0511	0.0036	109.5	2.7	114.8	7.2	170	140	109.5	2.7	35.5882	4.61672
	101018_34_39	451	664.3	1.507	0.1168	0.0043	0.01721	0.00033	0.28606	0.0494	0.0018	110	2.1	111.9	3.9	142	76	110	2.1	22.5352	1.69794
	101018_34_24	69.1	116.6	1.685	0.1065	0.0092	0.01738	0.00052	0.20443	0.0442	0.0037	111.1	3.3	101.7	8.4	-110	160	111.1	3.3	201	-9.24287
	101018_34_4	118.5	244.2	2.079	0.1296	0.0064	0.0177	0.00043	0.16744	0.0539	0.0028	113.1	2.7	124	5.6	310	100	113.1	2.7	63.5161	8.79032
	101018_34_81	157.9	86.9	0.553	0.128	0.013	0.01775	0.00064	0.027724	0.053	0.0056	113.4	4	121	12	200	210	113.4	4	43.3	6.28099
	101018_34_95	100.8	83.7	0.871	0.124	0.012	0.01796	0.00067	0.25478	0.0497	0.0048	114.7	4.3	117	11	80	190	114.7	4.3	-43.375	1.96581
	101018_34_64	152.4	206.9	1.352	0.1239	0.0073	0.01801	0.00044	0.068648	0.0503	0.003	115.1	2.8	117.9	6.5	140	120	115.1	2.8	17.7857	2.37489
	101018_34_15	428	274.3	0.647	0.1249	0.0058	0.01834	0.00046	0.060879	0.0498	0.0024	117.1	2.9	119.1	5.2	151	100	117.1	2.9	22.4503	1.67926
	101018_34_54	768	306	0.409	0.1277	0.0071	0.01856	0.00042	0.16416	0.0499	0.0029	118.6	2.6	121.4	6.4	130	110	118.6	2.6	8.76923	2.30643
	101018_34_66	69.5	83.4	1.201	0.135	0.012	0.01914	0.00062	-0.22995	0.0531	0.0053	122.2	3.9	127	11	160	190	122.2	3.9	23.625	3.77953
	101018_34_16	59.3	65.2	1.088	0.136	0.014	0.01947	0.00069	0.0085585	0.0514	0.0054	124.3	4.4	127	12	90	190	124.3	4.4	-38.1111	2.12598
	101018_34_42	251.8	135.2	0.536	0.139	0.01	0.01957	0.00067	-0.057654	0.0531	0.0046	124.9	4.2	131.5	9.2	230	170	124.9	4.2	45.6957	5.01901
	101018_34_19	1077	592.5	0.552	0.137	0.0054	0.01989	0.00042	-0.00089148	0.0499	0.0021	126.9	2.7	130.1	4.8	171	89	126.9	2.7	25.7895	2.45965
	101018_34_30	191.3	126.5	0.676	0.1373	0.01	0.02031	0.00055	0.087976	0.049	0.0036	129.6	3.5	129.4	8.9	90	140	129.6	3.5	-44	-0.15456
	101018_34_49	175.9	91.9	0.5221	0.135	0.012	0.0204	0.00069	-0.074577	0.0497	0.0046	130.1	4.4	127	10	50	170	130.1	4.4	-160.2	-2.44094
	101018_34_14	233.1	183.2	0.778	0.1396	0.0082	0.02095	0.00055	0.21864	0.0488	0.0029	133.6	3.5	131.8	7.3	80	120	133.6	3.5	-67	-1.36571
	101018_34_10	217.3	190.4	0.882	0.1392	0.007	0.021	0.00052	0.034115	0.0488	0.0026	134	3.3	131.8	6.2	110	110	134	3.3	-21.8182	-1.6692
	101018_34_69	146	139.2	0.957	0.147	0.019	0.02196	0.00096	0.14171	0.0491	0.0064	140	6.1	138	17	60	250	140	6.1	-133.333	-1.44928
	101018_34_38	2058	804	0.3909	0.1485	0.0045	0.02209	0.00043	0.45679	0.0486	0.0013	140.9	2.7	140.4	3.9	115	56	140.9	2.7	-22.5217	-0.356125
	101018_34_46	604	579	0.964	0.1583	0.0054	0.02389	0.00045	0.28736	0.0481	0.0015	152.2	2.9	149.5	4.9	99	69	152.2	2.9	-53.7374	-1.80602
	101018_34_86	152.5	88.3	0.5753	0.171	0.017	0.02402	0.00076	0.0078629	0.0524	0.0055	153	4.8	158	15	160	200	153	4.8	4.375	3.16456
	101018_34_83	280	174.1	0.613	0.172	0.011	0.0244	0.00082	0.093224	0.0526	0.0037	155.4	5.2	160.9	9.2	240	140	155.4	5.2	35.25	3.41827
	101018_34_100	669	298	0.4666	0.1723	0.0067	0.02531	0.00055	0.11054	0.0495	0.002	161.1	3.5	161.7	6	150	85	161.1	3.5	-7.4	0.371058
	101018_34_31	869	493	0.5646	0.1767	0.0063	0.02579	0.00051	0.27077	0.05	0.0017	164.1	3.2	165.5	5.5	171	74	164.1	3.2	4.03509	0.845921
	101018_34_20	1754	564	0.3199	0.1947	0.0058	0.02861	0.00053	0.38535	0.0495	0.0013	181.8	3.3	180.3	4.9	163	60	181.8	3.3	-11.5337	-0.831947
	101018_34_52	336	236.6	0.715	0.2373	0.0096	0.03323	0.00079	0.19035	0.0525	0.0023	210.7	4.9	215.4	8	258	92	210.7	4.9	18.3333	2.18199
	101018_34_60	252.8	125.3	0.499	0.225	0.012	0.03393	0.0008	0.077344	0.0479	0.0026	215.1	5	206	11	90	110	215.1	5	-139	-4.41748
	101018_34_17	525	338	0.639	0.2329	0.0081	0.03456	0.00067	0.22303	0.0488	0.0016	219	4.2	212.9	6.9	149	75	219	4.2	-46.9799	-2.86519
	101018_34_90	202.4	130.4	0.6403	0.259	0.014	0.03597	0.00081	-0.015051	0.0524	0.0031	228.4	5.2	232	11	240	120	228.4	5.2	4.83333	1.55172
	101018_34_89	157.4	113.9	0.722	0.258	0.014	0.03673	0.0008	0.099907	0.051	0.0028	232.5	5	232	11	180	110	232.5	5	-29.1667	-0.215517
	101018_34_82	193.4	169.5	0.865	0.253	0.012	0.03686	0.0008	0.19475	0.0494	0.0022	233.3	5	227.8	9.5	152	96	233.3	5	-53.4868	-2.4144
	101018_34_27	96.4	87.3	0.902	0.268	0.021	0.0373	0.0011	0.1629	0.0527	0.0042	235.9	7.1	239	17	230	160	235.9	7.1	-2.56522	1.29707
	101018_34_76	96.4	56.1	0.604	0.26	0.021	0.0373	0.0012	-0.072741	0.051	0.0044	235.9	7.3	231	17	130	160	235.9	7.3	-81.4615	-2.12121
	101018_34_23	786	492	0.631	0.267	0.0082	0.0376	0.0007	0.3056	0.0514	0.0015	237.9	4.3	239.8	6.5	242	63	237.9	4.3	1.69421	0.792327
	101018_34_59	73.9	77.03	1.034	0.285	0.019	0.04013	0.0011	0.20449	0.0518	0.0034	253.6	6.6	251	15	180	130	253.6	6.6	-40.8889	-1.03586
	101018_34_73	224.9	360.2	1.583	0.2861	0.0088	0.04032	0.00068	0.13291	0.0514	0.0016	254.8	4.2	254.9	6.9	238	67	254.8	4.2	-7.05882	0.0392311
	101018_34_32	90.8	424	4.608	0.3121	0.0084	0.04424	0.00086	0.301	0.0513	0.0013	279	5.3	275.3	6.5	242	58	279	5.3	-15.2893	-1.34399
	101018_34_41	588	651	1.121	0.3159	0.008	0.04424	0.00075	0.32767	0.0521	0.0013	279	4.6	278.3	6.2	270	54	279	4.6	-3.33333	-0.251527
	101018_34_51	143.9	342	2.356	0.326	0.011	0.04454	0.00088	0.42327	0.0531	0.0017	280.9	5.4	285.3	8.6	304	69	280.9	5.4	7.59868	1.54224
	101018_34_50	134	132.9	0.971	0.703	0.029	0.0868	0.002	0.26859	0.0588	0.0023	536	12	539	17	514	84	536	12	-4.28016	0.556586
	101018_34_94	143.6	157	1.214	0.764	0.023	0.0929	0.0017	0.2896	0.0595	0.0017	572.5	9.9	574	13	559	65	572.5	9.9	-2.41503	0.261324
	101018_34_1	117	77.5	0.661	0.837	0.032	0.1016	0.0023	0.14089	0.0602	0.0024	623	13	613	18	550	86	623	13	-13.2727	-1.63132
	U-Pb LA-ICPMS detrital zircon data
	Sample Location: Breeza Plains 1 Well, Queensland (sample name: 081018-12; Breexa Plains, Queensland)
	Formation: Dalrymple Sandstone
	Sample #	Th (PPM)	U (PPM)	Th/U	Pb207	±	Pb206	±	Error	Pb207	±	Pb206	± 2σ	Pb207	± 2σ	Pb207	± 2σ	Preferred	± 2σ	Pb-Pb/U-Pb Discordance (%)	U-Pb/U-Pb Discordance (%)
	081018-12				/U235	2σ	/U238	2σ	Corr.	/Pb206	2σ	/U238 (Ma)	(Ma)	/U235	(Ma)	/Pb206	(Ma)	Age	(Ma)
	081018-12_26	216.1	161.1	0.739	0.166	0.011	0.02318	0.0005	0.10587	0.052	0.0034	147.7	3.1	154.4	9.3	200	130	147.7	3.1	26.15	4.33938
	081018-12_39	54.7	57.6	1.162	0.16	0.017	0.02335	0.00083	0.041355	0.0521	0.0061	148.7	5.2	147	15	80	200	148.7	5.2	-85.875	-1.15646
	081018-12_62	47.1	56.6	1.237	0.163	0.017	0.02349	0.0008	-0.18477	0.0517	0.0055	149.6	5	152	15	130	210	149.6	5	-15.0769	1.57895
	081018-12_95	58.2	89.5	1.518	0.148	0.012	0.02349	0.00075	-0.14795	0.0475	0.0043	149.6	4.7	138	10	-20	160	149.6	4.7	848	-8.4058
	081018-12_65	71.8	59.9	0.849	0.166	0.016	0.02355	0.00087	-0.011093	0.0523	0.0053	150	5.5	153	14	130	190	150	5.5	-15.3846	1.96078
	081018-12_96	368	171	0.4644	0.155	0.011	0.02355	0.00056	0.083139	0.0471	0.0031	150	3.5	145.4	9.2	30	130	150	3.5	-400	-3.16369
	081018-12_60	51	54	1.077	0.169	0.019	0.02369	0.00084	-0.050184	0.0527	0.0061	150.9	5.3	155	16	160	220	150.9	5.3	5.6875	2.64516
	081018-12_17	192.2	163.3	0.852	0.1688	0.0098	0.02371	0.00054	-0.11187	0.0524	0.0033	151	3.4	157.4	8.5	220	130	151	3.4	31.3636	4.06607
	081018-12_6	188.3	157.8	0.8322	0.1616	0.0096	0.02371	0.0005	0.00037772	0.0497	0.0031	151.1	3.2	151	8.4	110	120	151.1	3.2	-37.3636	-0.0662252
	081018-12_36	185	146.9	0.795	0.1625	0.0094	0.02374	0.00057	0.025183	0.0499	0.003	151.2	3.6	151.8	8.1	150	120	151.2	3.6	-0.8	0.395257
	081018-12_53	58.6	55.3	0.95	0.159	0.018	0.02381	0.00078	-0.012389	0.0496	0.0057	151.6	4.9	146	16	30	210	151.6	4.9	-405.333	-3.83562
	081018-12_70	37.2	43.8	1.205	0.164	0.021	0.0239	0.0011	-0.069488	0.0516	0.0071	152	6.8	153	18	90	250	152	6.8	-68.8889	0.653595
	081018-12_42	517	237.1	0.4592	0.1633	0.008	0.02396	0.00051	0.2657	0.0495	0.0024	152.6	3.2	152.8	7	140	99	152.6	3.2	-9	0.13089
	081018-12_73	550	256	0.4625	0.171	0.0082	0.02422	0.00052	0.31085	0.0514	0.0022	154.3	3.2	160.5	6.9	221	92	154.3	3.2	30.181	3.86293
	081018-12_44	272.6	119.2	0.4348	0.169	0.01	0.02432	0.00063	-0.027699	0.0514	0.0035	154.9	3.9	157.3	9	160	130	154.9	3.9	3.1875	1.52575
	081018-12_41	60.7	59.6	1.018	0.164	0.017	0.02462	0.00097	0.17271	0.0492	0.0053	156.7	6.1	151	15	40	200	156.7	6.1	-291.75	-3.77483
	081018-12_106	100.3	62.5	0.625	0.174	0.017	0.02469	0.00079	0.048749	0.0515	0.0053	157.2	5	159	15	90	190	157.2	5	-74.6667	1.13208
	081018-12_91	3330	881	0.265	0.1731	0.0051	0.02478	0.00044	0.20444	0.0504	0.0014	157.8	2.8	161.9	4.4	204	63	157.8	2.8	22.6471	2.53243
	081018-12_97	753	314.1	0.411	0.1637	0.0063	0.0248	0.00052	0.2112	0.048	0.0018	157.9	3.2	153.4	5.5	85	79	157.9	3.2	-85.7647	-2.93351
	081018-12_46	183.7	157.9	0.8525	0.175	0.01	0.02507	0.00051	0.068664	0.051	0.0031	159.6	3.2	163.4	9	160	120	159.6	3.2	0.25	2.32558
	081018-12_84	4366	1752	0.3985	0.1874	0.004	0.0256	0.00039	0.51036	0.05318	0.00098	162.9	2.5	174.2	3.4	321	42	162.9	2.5	49.2523	6.4868
	081018-12_87	376.4	404	1.07	0.1909	0.0074	0.02624	0.00051	0.10382	0.0529	0.0021	166.9	3.2	176.8	6.3	277	85	166.9	3.2	39.7473	5.59955
	081018-12_20	655.6	309.7	0.4679	0.1816	0.0075	0.02645	0.00044	0.080748	0.0496	0.002	168.3	2.8	168.8	6.5	152	87	168.3	2.8	-10.7237	0.296209
	081018-12_103	238.2	284.1	1.22	0.1806	0.0078	0.02666	0.00061	0.31079	0.0493	0.002	169.6	3.9	167.9	6.7	131	86	169.6	3.9	-29.4656	-1.01251
	081018-12_32	342	161.2	0.4696	0.194	0.013	0.027	0.0008	-0.0098689	0.0521	0.0037	171.7	5	179	11	230	150	171.7	5	25.3478	4.07821
	081018-12_82	106.1	85.4	0.815	0.195	0.015	0.02768	0.00077	0.26192	0.051	0.004	175.9	4.8	180	13	160	150	175.9	4.8	-9.9375	2.27778
	081018-12_57	274	153.5	0.564	0.193	0.01	0.0278	0.00064	0.011696	0.0508	0.0029	176.7	4	177.6	8.9	160	120	176.7	4	-10.4375	0.506757
	081018-12_102	141	118	0.863	0.199	0.012	0.02779	0.00075	0.22042	0.0522	0.0032	176.7	4.7	183	10	210	120	176.7	4.7	15.8571	3.44262
	081018-12_99	642	354	0.5396	0.1911	0.0077	0.02785	0.00057	0.2684	0.0496	0.0019	177	3.6	177	6.6	158	82	177	3.6	-12.0253	0
	081018-12_8	49.8	58.4	1.165	0.211	0.021	0.02803	0.00096	0.023609	0.0554	0.0056	179	6.2	190	18	230	200	179	6.2	22.1739	5.78947
	081018-12_55	109.8	94.7	0.868	0.194	0.014	0.02849	0.00079	0.083089	0.0495	0.0035	181.1	5	178	12	110	140	181.1	5	-64.6364	-1.74157
	081018-12_105	86.4	66.4	0.763	0.192	0.016	0.0285	0.00093	0.013111	0.0482	0.0041	181.1	5.8	176	13	80	160	181.1	5.8	-126.375	-2.89773
	081018-12_61	324	198	0.629	0.201	0.012	0.02855	0.00063	0.05261	0.0516	0.0031	181.4	3.9	185	9.9	190	120	181.4	3.9	4.52632	1.94595
	081018-12_71	119.5	141.5	1.205	0.202	0.013	0.0286	0.00072	0.18605	0.0515	0.0033	181.7	4.5	186	11	180	130	181.7	4.5	-0.944444	2.31183
	081018-12_13	165.5	120.7	0.727	0.193	0.012	0.02887	0.00066	-0.035617	0.0492	0.0031	183.4	4.1	177.5	9.8	90	130	183.4	4.1	-103.778	-3.32394
	081018-12_78	61.45	63.3	1.023	0.197	0.019	0.02891	0.00096	0.082278	0.0512	0.005	183.6	6	181	16	90	190	183.6	6	-104	-1.43646
	081018-12_101	114.8	83.7	0.726	0.198	0.016	0.02897	0.00083	0.0089588	0.0508	0.0044	184	5.2	181	14	110	170	184	5.2	-67.2727	-1.65746
	081018-12_75	105.8	75.8	0.735	0.219	0.018	0.02907	0.00087	0.047435	0.055	0.0048	184.7	5.4	198	15	260	170	184.7	5.4	28.9615	6.71717
	081018-12_3	194.3	168.6	0.866	0.209	0.011	0.02994	0.0006	0.049548	0.051	0.0029	190.1	3.7	191.7	9.5	170	110	190.1	3.7	-11.8235	0.834637
	081018-12_56	87.6	60	0.682	0.22	0.02	0.0302	0.0011	0.079009	0.0535	0.0051	191.5	6.8	201	17	250	190	191.5	6.8	23.4	4.72637
	081018-12_92	262	132.6	0.4892	0.217	0.013	0.03066	0.00082	-0.041712	0.0519	0.0033	194.6	5.1	198	10	210	130	194.6	5.1	7.33333	1.71717
	081018-12_51	358	186	0.586	0.229	0.012	0.03109	0.00065	0.0751	0.0538	0.0029	197.3	4.1	207.9	9.9	280	110	197.3	4.1	29.5357	5.09861
	081018-12_93	282	184	0.66	0.25	0.015	0.03243	0.00078	0.038399	0.0558	0.0034	205.7	4.9	227	11	400	120	205.7	4.9	48.575	9.38326
	081018-12_16	42.8	50.1	1.197	0.245	0.021	0.0339	0.0011	-0.018383	0.0532	0.0047	215	7.1	220	17	210	170	215	7.1	-2.38095	2.27273
	081018-12_31	145.9	139.4	0.95	0.236	0.013	0.03394	0.00068	0.077806	0.0513	0.003	215.1	4.2	213	11	180	120	215.1	4.2	-19.5	-0.985915
	081018-12_30	37.47	75.9	1.987	0.25	0.016	0.0344	0.00086	0.0558	0.0533	0.0036	218	5.4	226	13	250	140	218	5.4	12.8	3.53982
	081018-12_50	87.5	50.61	0.5753	0.267	0.024	0.0367	0.0012	0.077141	0.0527	0.0049	232.4	7.6	235	19	180	180	232.4	7.6	-29.1111	1.10638
	081018-12_85	175.4	140.6	0.796	0.28	0.014	0.03825	0.001	0.070081	0.0534	0.0029	241.9	6.5	249	11	290	110	241.9	6.5	16.5862	2.85141
	081018-12_64	173.6	154.6	0.894	0.284	0.013	0.03836	0.00082	0.11829	0.0539	0.0025	242.6	5.1	252	10	304	99	242.6	5.1	20.1974	3.73016
	081018-12_40	116.5	105.7	0.96	0.282	0.017	0.03859	0.00086	0.085258	0.0526	0.0031	244	5.4	249	13	240	120	244	5.4	-1.66667	2.00803
	081018-12_45	344.5	259	0.7441	0.291	0.011	0.03937	0.00075	0.072791	0.0539	0.0022	248.9	4.7	258.3	8.9	309	85	248.9	4.7	19.4498	3.63918
	081018-12_86	369	192.3	0.5166	0.273	0.011	0.0396	0.00088	0.18955	0.0502	0.0021	250.3	5.5	244	9	167	88	250.3	5.5	-49.8802	-2.58197
	081018-12_2	192.4	109.6	0.5648	0.279	0.015	0.03974	0.00095	0.16339	0.0508	0.0027	251.2	5.9	248	12	190	110	251.2	5.9	-32.2105	-1.29032
	081018-12_63	74.4	63.1	0.856	0.317	0.022	0.0436	0.0011	0.02623	0.0532	0.0037	274.9	6.8	275	17	230	140	274.9	6.8	-19.5217	0.0363636
	081018-12_66	280	546	1.967	0.318	0.011	0.04358	0.00078	0.36942	0.0528	0.0016	274.9	4.8	279.2	8.2	293	68	274.9	4.8	6.17747	1.54011
	081018-12_22	167.1	774	4.583	0.3133	0.0075	0.04386	0.00062	0.25628	0.0517	0.0012	276.7	3.8	276.3	5.8	251	50	276.7	3.8	-10.239	-0.14477
	081018-12_98	227.6	184.5	0.804	0.312	0.014	0.04407	0.0008	0.19149	0.0512	0.0023	278	4.9	274	11	199	92	278	4.9	-39.6985	-1.45985
	081018-12_104	644	611	0.991	0.3223	0.009	0.04456	0.00083	0.27192	0.0524	0.0014	281	5.1	283.1	6.9	289	59	281	5.1	2.76817	0.741787
	081018-12_69	286	413	1.67	0.3191	0.01	0.0447	0.00073	0.32047	0.0517	0.0016	281.8	4.5	280.3	7.9	247	66	281.8	4.5	-14.0891	-0.535141
	081018-12_76	275	638	2.44	0.367	0.011	0.04568	0.00073	0.25254	0.0579	0.0016	287.9	4.5	316.9	7.9	508	60	287.9	4.5	43.3268	9.15115
	081018-12_33	111.1	175	1.504	0.327	0.016	0.0458	0.0011	0.30135	0.0516	0.0024	288.3	6.6	285	12	250	100	288.3	6.6	-15.32	-1.15789
	081018-12_12	181.4	92.4	0.5053	0.374	0.02	0.04618	0.001	-0.081565	0.059	0.0033	291	6.1	319	14	470	120	291	6.1	38.0851	8.77743
	081018-12_58	106.8	93.7	0.92	0.349	0.025	0.0463	0.0013	0.24177	0.0549	0.004	291.9	7.7	300	19	290	140	291.9	7.7	-0.655172	2.7
	081018-12_59	569	500	0.893	0.3454	0.0087	0.04758	0.00074	0.20752	0.0529	0.0013	299.6	4.5	301.5	6.8	299	56	299.6	4.5	-0.200669	0.630182
	081018-12_94	163.2	89.2	0.5395	0.364	0.024	0.0493	0.0013	0.066527	0.0542	0.0037	309.8	8	311	17	270	130	309.8	8	-14.7407	0.385852
	081018-12_47	180	202	1.137	0.389	0.016	0.05293	0.0011	0.16997	0.0532	0.0022	332.4	6.7	333	12	309	86	332.4	6.7	-7.57282	0.18018
	081018-12_18	145	115.3	0.787	0.387	0.017	0.05315	0.0011	-0.066336	0.0529	0.0025	333.7	6.5	329	13	280	100	333.7	6.5	-19.1786	-1.42857
	081018-12_21	196	210	1.091	0.405	0.015	0.05427	0.00096	0.28726	0.054	0.0018	340.6	5.9	344	10	332	73	340.6	5.9	-2.59036	0.988372
	081018-12_27	271	554	2.002	0.425	0.0091	0.05861	0.00081	0.15628	0.0522	0.0011	367.1	5	360	6.7	296	51	367.1	5	-24.0203	-1.97222
	081018-12_80	427.8	253.1	0.5984	0.459	0.013	0.05999	0.001	0.28081	0.0557	0.0015	375.5	6.3	382.7	9	409	61	375.5	6.3	8.19071	1.88137
	081018-12_77	1420	1040	0.763	0.4643	0.01	0.06196	0.0009	0.47468	0.0542	0.001	387.5	5.4	387.5	7.2	361	42	387.5	5.4	-7.34072	0
	081018-12_100	306	507	1.627	0.488	0.012	0.06437	0.0011	0.30056	0.055	0.0012	402.1	6.4	402.7	8.1	389	51	402.1	6.4	-3.36761	0.148994
	081018-12_28	259.6	338.8	1.29	0.523	0.018	0.0663	0.0013	0.54278	0.0577	0.0017	413.4	8	426	12	479	64	413.4	8	13.6952	2.95775
	081018-12_10	246.7	168.3	0.6768	0.509	0.018	0.0686	0.0011	-0.039447	0.0539	0.0021	427.6	6.8	415	12	332	84	427.6	6.8	-28.7952	-3.03614
	081018-12_90	687	428.9	0.6134	0.736	0.015	0.0892	0.0014	0.45214	0.0597	0.0011	551	8.6	558.8	9	584	38	551	8.6	5.65068	1.39585
	081018-12_23	508.1	485.3	0.947	0.735	0.015	0.0895	0.0014	0.35182	0.0595	0.0011	552.4	8	558.4	8.5	573	42	552.4	8	3.59511	1.0745
	081018-12_5	351.5	60.3	0.1706	0.707	0.034	0.0901	0.0017	-0.032525	0.0569	0.0028	555.9	10	537	20	420	110	555.9	10	-32.3571	-3.51955
	081018-12_35	77.7	573	7.46	1.996	0.036	0.1673	0.0026	0.71334	0.08636	0.00098	997	14	1112	12	1343	21	997	14	25.7632	10.3417
	081018-12_25	83.6	33.1	0.3926	2.11	0.11	0.1924	0.0042	0.22664	0.08	0.004	1133	23	1139	36	1120	100	1120	100	-1.16071	0.526778
	081018-12_15	553	252.3	0.4501	1.987	0.037	0.1843	0.0025	0.41694	0.078	0.0013	1090	14	1111	12	1139	31	1139	31	4.30202	1.89019
	081018-12_81	168.6	184	1.073	3.161	0.066	0.2422	0.0047	0.64898	0.0943	0.0015	1397	24	1444	16	1505	30	1505	30	7.17608	3.25485
	081018-12_89	203	290	1.5	3.27	0.13	0.2516	0.0088	0.93333	0.0944	0.0016	1442	47	1464	34	1509	32	1509	32	4.44003	1.50273
	081018-12_19	126.6	336	2.54	3.464	0.059	0.264	0.0045	0.54584	0.0952	0.0013	1510	23	1517	13	1525	25	1525	25	0.983607	0.461437
	081018-12_72	95.6	356.2	3.75	3.337	0.065	0.2532	0.0045	0.71067	0.0952	0.0012	1454	23	1488	15	1527	24	1527	24	4.78062	2.28495
	081018-12_83	35.9	516.1	14.71	3.519	0.054	0.2661	0.0039	0.65302	0.09588	0.00096	1521	20	1530	12	1541	19	1541	19	1.29786	0.588235
	081018-12_14	64.7	601	9.87	3.617	0.06	0.2716	0.0045	0.57694	0.0965	0.0013	1549	23	1554	14	1553	26	1553	26	0.257566	0.32175
	081018-12_1	75.6	348	4.76	3.649	0.053	0.2724	0.0039	0.5824	0.0969	0.001	1553	20	1559.2	12	1561	20	1561	20	0.512492	0.39764
[truncated: 5,386 more rows]

## Sheet: G49328
Foley, E.K., et al., 2021, Jurassic Arc: Reconstructing the Lost World of eastern Gondwana: Geology, v. 49, https://doi.org/10.1130/G49328.1
