# Supplementary material
Source: publisher figshare collection journal article supplement (https://gsapubs.figshare.com/articles/dataset/_/14925234)
Supplement: Supplementary file 3 [file 1]

## **Jurassic Arc: Reconstructing the lost world of eastern Gondwana**

Elliot.K. Foley\*, R.A. Henderson, E.M. Roberts, A.I.S. Kemp, C.N. Todd, E.M. Knutsen, C. Fisher, C.C. Wainman and Carl Spandler.

Department of Geosciences, James Cook University Townsville, Queensland 4811, Australia

\*E-mail contact: [elliott.foley@my.jcu.edu.au](mailto:elliott.foley@my.jcu.edu.au)

### **SUPPLEMENTARY PAPERS**

*Geology* (2021)

---

#### **SUPPLEMENTARY PAPERS**

**Supplementary file A.** List of samples used for U-Pb geochronology in this study (PDF).

**Supplementary file B.** U-Pb geochronological datasets (Excel file).

**Supplementary file C.** List of samples used for Lu-Hf analysis in this study (PDF).

**Supplementary file D.** Lu-Hf isotope analytical datasets (Excel file).

**Supplementary file E.** Analytical setup and procedures used (PDF).

**Supplementary file F.** Crustal addition rate calculations (PDF).

**Supplementary file G.** Supplementary Figure 1. Plotted  $\epsilon\text{Hf}$  data with isotopic evolution curves (PDF).

**SUPPLEMENTARY DATA** (# corresponds to number of analyses accepted and used in this study)

| Sample Name     | #  | Coordinates (UTM) |               | Sample Type |         | Well Name        | Depth (m) | Basin             | Formation                 | Reference            |
|-----------------|----|-------------------|---------------|-------------|---------|------------------|-----------|-------------------|---------------------------|----------------------|
|                 |    | Lat.              | Long.         | Core        | Outcrop |                  |           |                   |                           |                      |
| DINO_TRACK      | 16 | 20.143116° S      | 143.640990° E |             | X       | -                | -         | Eromanga Basin    | Blantyre Sandstone        |                      |
| 081018-6        | 13 | 14.893964° S      | 143.974568° E | X           |         | Lakefield 1      | 389.5     | Laura Basin       | Gilbert River Formation   |                      |
| 101018-2        | 68 | 19.295442° S      | 140.381436° E | X           |         | Dobbyn 1         | 35.3      | Carpentaria Basin | Normanton Formation       |                      |
| 101018-4        | 43 | 14.535470° S      | 143.862274° E | X           |         | Ebagoola 1       | 339.5     | Laura Basin       | Gilbert River Formation   |                      |
| RP1-DZ-UGR      | 23 | 15.656832° S      | 141.856686° E | X           |         | Rutland Plains 1 | 1005.5    | Carpentaria Basin | Gilbert River Formation   | Foley et al. (2021)  |
| W1-DZ-UGR       | 16 | 12.785066° S      | 142.404824° E | X           |         | Weipa 1          | 429.6     | Carpentaria Basin | Gilbert River Formation   | Foley et al. (2021)  |
| 101018-34       | 32 | 17.715162° S      | 141.034461° E | X           |         | Normanton 1      | 94.8      | Carpentaria Basin | Normanton Formation       |                      |
| 081018-12       | 53 | 14.737267° S      | 143.919729° E | X           |         | Breeza Plains 1  | 495.0     | Laura Basin       | Dalrymple Sandstone       |                      |
| Top Middle Loth | 50 | 19.742728° S      | 143.630618° E |             | X       | -                | -         | Carpentaria Basin | Loth Formation            | Foley et al. (2020)  |
| MV6             | 68 | 25.925457° S      | 152.432065° E |             | X       | -                | -         | Nambour Basin     | Tiaro Coal Measures       |                      |
| MV17            | 29 | 25.559521° S      | 152.598749° E |             | X       | -                | -         | Maryborough Basin | Grahams Creek Formation   |                      |
| MV16            | 78 | 25.551491° S      | 152.509175° E |             | X       | -                | -         | Maryborough Basin | Grahams Creek Formation   |                      |
| MV1             | 21 | 25.740955° S      | 152.468957° E |             | X       | -                | -         | Nambour Basin     | Myrtle Creek Sandstone    |                      |
| PGF01           | 17 | 20.335259° S      | 144.469013° E |             | X       | -                | -         | Galilee Basin     | Porcupine Gorge Formation |                      |
| H7B55           | 30 | 20.950001° S      | 144.183329° E | X           |         | Hughenden 7      | 184.0     | Eromanga Basin    | Gilbert River Formation   |                      |
| H7B66           | 11 | 20.950001° S      | 144.183329° E | X           |         | Hughenden 7      | 230.0     | Eromanga Basin    | Injune Creek Group        |                      |
| H7B59           | 11 | 20.950001° S      | 144.183329° E | X           |         | Hughenden 7      | 198.0     | Eromanga Basin    | Hooray Sandstone          |                      |
| McKinlay-02     | 4  | 21.592507° S      | 142.259717° E | X           |         | McKinlay-1       | 9.3       | Eromanga Basin    | Winton Formation          | Tucker et al. (2016) |
| Longmac1        | 7  | 23.111931° S      | 144.599555° E | X           |         | Longreach 1      | 27.0      | Eromanga Basin    | Mackunda Formation        | Tucker et al. (2016) |

|             |    |                 |                  |   |   |            |        |                |                       |                       |
|-------------|----|-----------------|------------------|---|---|------------|--------|----------------|-----------------------|-----------------------|
| ISIS        | 3  | 24.259307°<br>S | 144.441483°<br>E |   | X | -          | -      | Eromanga Basin | Winton Formation      | Tucker et al. (2016)  |
| ERO1        | 16 | 26.614710°<br>S | 143.880111°<br>E | X |   | Eromanga 1 | 20.0   | Eromanga Basin | Winton Formation      | Tucker et al. (2016)  |
| Maneroo-331 | 5  | 23.385865°<br>S | 144.467891°<br>E | X |   | Maneroo 1  | 343.0  | Eromanga Basin | Mackunda Formation    | Tucker et al. (2016)  |
| Blackall-02 | 8  | 24.162590°<br>S | 144.223606°<br>E | X |   | Blackall 2 | 27.0   | Eromanga Basin | Winton Formation      | Tucker et al. (2016)  |
| BBD4        | 6  | 22.514825°<br>S | 143.038857°<br>E |   | X | -          | -      | Eromanga Basin | Winton Formation      | Tucker et al. (2016)  |
| HadesHill   | 13 | 23.016288°<br>S | 142.411865°<br>E |   | X | -          | -      | Eromanga Basin | Winton Formation      | Tucker et al. (2016)  |
| McKinlay-16 | 14 | 21.592507°<br>S | 142.259717°<br>E | X |   | McKinlay-1 | 54.0   | Eromanga Basin | Winton Formation      | Tucker et al. (2016)  |
| QMF7882     | 2  | 24.470004°<br>S | 150.699994°<br>E |   | X | -          | -      | Surat Basin    | Evergreen Formation   | Todd et al. (2019)    |
| QMF1659     | 8  | 24.626003°<br>S | 149.742999°<br>E |   | X | -          | -      | Surat Basin    | Walloon Coal Measures | Todd et al. (2019)    |
| MMD_19_001  | 9  | 23.629325°<br>S | 50.370667°<br>E  |   | X | -          | -      | Surat Basin    | Razorback Beds        |                       |
| 2550367     | 6  | 28.044004°<br>S | 141.961701°<br>E | X |   | Zeus 7     | 1667.5 | Eromanga Basin | Birkhead Formation    | Wainman et al. (2018) |
| 2550364     | 9  | 28.044004°<br>S | 141.961701°<br>E | X |   | Zeus 7     | 1659.3 | Eromanga Basin | Birkhead Formation    | Wainman et al. (2018) |

## References

Foley, E.K., Baty, M., Knusten, E.M., Lignum, J.S., and Roberts, E.M., 2020, Jurassic-Early Cretaceous paleogeography and paleoenvironments of the north-eastern margin of Gondwana: Insights from the Carpentaria Basin, Australia: Gondwana Research, v. 88, p. 126-149, doi.org/10.1016/j.gr.2020.07.003.

Foley, E. K., Roberts, E. M., Knutsen, E. M., and Hannaford, C., 2021, Cryptic Middle to Late Jurassic marine incursions into northeastern Gondwana: An integrated sedimentological, ichnological and geochronological approach: Palaeogeography, Palaeoclimatology, Palaeoecology, v. 569, 110330, doi.org/10.1016/j.palaeo.2021.110330

Todd, C.N., Roberts, E.M., Knutsen, E.M., Rozefelds, A.C., Huang, H.Q., and Spandler, C., 2019, Refined age and geological context of two of Australia's most important Jurassic vertebrate taxa (*Rhoetosaurus brownie* and *Siderops kehli*), Queensland: Gondwana Research, v. 76, p. 19-25, doi.org/10.1016/j.gr.2019.05.008

Tucker, R.T., Roberts, E.M., Henderson, R.A., and Kemp, A.I.S., 2016, Large igneous province or long-lived magmatic arc along the eastern margin of Australia during the Cretaceous? Insights from the sedimentary record: Bulletin of the Geological Society of America, v. 128, p. 1461–1480, doi:10.1130/B31337.1.10.1130

Wainman, C. C., McCabe, P. J., and Crowley, J. L., 2018, Solving a tuff problem: Defining a chronostratigraphic framework for Middle to Upper Jurassic nonmarine strata in eastern Australia using uranium–lead chemical abrasion–thermal ionization mass spectrometry zircon dates: AAPG Bulletin, v. 102, p. 1141-1168, doi.org/10.1306/07261717140
