# Supplementary material
Source: publisher figshare collection journal article supplement (https://gsapubs.figshare.com/articles/dataset/_/14925234)
Supplement: Supplementary file 4 [file 1]

## **Jurassic Arc: Reconstructing the lost world of eastern Gondwana**

Elliot.K. Foley\*, R.A. Henderson, E.M. Roberts, A.I.S. Kemp, C.N. Todd, E.M. Knutsen, C. Fisher, C.C. Wainman and Carl Spandler.

Department of Geosciences, James Cook University Townsville, Queensland 4811, Australia

\*E-mail contact: [elliott.foley@my.jcu.edu.au](mailto:elliott.foley@my.jcu.edu.au)

### **SUPPLEMENTARY PAPERS**

*Geology* (2021)

---

#### **SUPPLEMENTARY PAPERS**

**Supplementary file A.** List of samples used for U-Pb geochronology in this study (PDF).

**Supplementary file B.** U-Pb geochronological datasets (Excel file).

**Supplementary file C.** List of samples used for Lu-Hf analysis in this study (PDF).

**Supplementary file D.** Lu-Hf isotope analytical datasets (Excel file).

**Supplementary file E.** Analytical setup and procedures used (PDF).

**Supplementary file F.** Crustal addition rate calculations (PDF).

**Supplementary file G.** Supplementary Figure 1. Plotted  $\epsilon\text{Hf}$  data with isotopic evolution curves (PDF).

## U-Pb isotopes by LA-SF-ICP-MS (UWA)

Zircon U-Pb isotope compositions were determined by LA-SF-ICPMS at The University of Western Australia. The LA-SF-ICPMS system used in this study consisted of an Element XR ICPMS coupled to a Cetac Analyte G2 193 nm ArF laser. During the course of this study we took advantage of the improved sensitivity of the Element XR's higher vacuum interface and employed a Jet sample cone and X skimmer cone configuration, along with 4.5 mL/min N<sup>2</sup> introduced with a total of 1 L/min of He carrier gas through the laser cell and Helix sample cup. Laser ablation analysis were carried out using a fluence of 4 J/cm<sup>2</sup>, a laser repetition rate of 5Hz, and laser spot diameter of 15  $\mu$ m. Each analysis consisted of a 10 s gas blank, while the laser was firing on the shutter, follow by 30 seconds of ablation time for a total of 150 laser shots. Each analysis also consisted of a 20 s washout period before the next analysis began. This routine measured masses, <sup>200</sup>Hg, <sup>202</sup>Hg, <sup>204</sup>Hg+Pb, <sup>206</sup>Pb, <sup>207</sup>Pb, <sup>208</sup>Pb, <sup>232</sup>Th, and <sup>238</sup>U. Daily ThO/Th was routinely less than 0.3% percent. While no common Pb correction was applied, samples with excess <sup>204</sup>Pb- beyond that of background- were rejected. All analyses were calibrated to the 1064 Ma 91500 zircon standard using the ID-TIMS data from Schoene et al., 2006. The 337 Ma Plešovice (Sláma et al., 2008) and the 416 Ma Temora 2 zircons were (Black et al., 2004) employed as a secondary standard to monitor the accuracy of the method. During this study, the weighted mean <sup>206</sup>Pb/<sup>238</sup>U age of Plešovice was 335  $\pm$  2 Ma (2SE), while the Temora 2 zircon yielded an age of 413  $\pm$  3 Ma (2SE). U-Pb isotope data were reduced using the method described in Fisher et al. (2014.).

| Thermo Fisher ELEMENT XR (SF-ICP-MS)         |                                                                                        |
|----------------------------------------------|----------------------------------------------------------------------------------------|
| Forward power                                | 1350 W                                                                                 |
| Plasma gas                                   | 16 L/ min Argon                                                                        |
| Auxiliary gas                                | 0.95 L/min Argon                                                                       |
| Make-up gas (He + N2)                        | 1.00 L/min He (Cell 0.30 L/min, Cup 0.70 L/min);<br>4.5 mL/min N2                      |
| Monitored masses                             | 238U, 232Th, 208Pb, 207Pb, 206Pb, 204Pb, 202Hg,<br>200Hg                               |
| Detector mode                                | Fixed in counting or analogue respective to count rate                                 |
| Cycle time                                   | 310ms                                                                                  |
| Other notes                                  | Quartz injector, Ni X skimmer & Jet sample cones,<br>tuned for ThO+/Th+ <0.3%; Th/U ~1 |
| Photon Machines Analyte.G2 ArF Excimer laser |                                                                                        |
| Wavelength                                   | 193 nm                                                                                 |
| Pulse length                                 | ~4 ns                                                                                  |
| Fluence                                      | ~4 J/cm <sup>2</sup>                                                                   |
| Cell                                         | HelEx II 2 volume cell                                                                 |
| Spot size                                    | 25 $\mu$ m                                                                             |
| Repetition rate                              | 5 Hz                                                                                   |
| Delay between analyses                       | 20s                                                                                    |
| Ablation duration                            | 30s                                                                                    |

## References

- Black, L.P., Kamo, S.L., Allen, C.M., Davis, D.W., Aleinikoff, J.N., Valley, J.W., Mundil, R., Campbell, I.H., Korsch, R.J., Williams, I.S., Foudoulis, C., 2004. Improved  $^{206}\text{Pb}/^{238}\text{U}$  microprobe geochronology by the monitoring of a trace-element-related matrix effect; SHRIMP, ID-TIMS, ELA-ICP-MS and oxygen isotope documentation for a series of zircon standards. *Chemical Geology* 205, 115-140.
- Fisher, C. M., Vervoort, J. D., & DuFrane, S. A., 2014, Accurate Hf isotope determinations of complex zircons using the “laser ablation split stream” method. *Geochemistry, Geophysics, Geosystems*, 15(1), 121–139.
- Schoene, B., Crowley, J.L., Condon, D.J., Schmitz, M.D., Bowring, S.A., 2006. Reassessing the uranium decay constants for geochronology using ID-TIMS U–Pb data. *Geochimica et Cosmochimica Acta* 70, 426-445.
- Sláma, J., Košler, J., Condon, D.J., Crowley, J.L., Gerdes, A., Hanchar, J.M., Horstwood, M.S.A., Morris, G.A., Nasdala, L., Norberg, N., Schaltegger, U., Schoene, B., Tubrett, M.N., Whitehouse, M.J., 2008. Plešovice zircon — A new natural reference material for U–Pb and Hf isotopic microanalysis. *Chemical Geology* 249, 1-35.

## U-Pb isotopes by LA-ICP-MS (JCU)

For comprehensive details of the U-Pb LA-ICP-MS setup employed at James Cook University (JCU), see Todd et al. (2019).

Zircon standards employed were GJ1 (609 Ma; Jackson et al., 2004), TEMORA 2 (417 Ma; Black et al., 2004), Plešovice (337 Ma; Sláma et al., 2008) and 91500 (1064 Ma; Schoene et al., 2006).

| Thermo iCAP-RQ                                      |                                     |
|-----------------------------------------------------|-------------------------------------|
| Forward power                                       | 1450 W                              |
| Plasma gas                                          | 15 L/ min Argon                     |
| Auxiliary gas                                       | 0.8 L/min Argon                     |
| Make-up gas                                         | 0.5 L/min Argon                     |
| Shield torch                                        | none                                |
| Sampling depth                                      | 5 mm                                |
| Photon Machines Analyte.G2 193 nm ArF Excimer laser |                                     |
| Wavelength                                          | 193 nm                              |
| Pulse length                                        | < 5 ns                              |
| Energy density                                      | ~3 J/cm <sup>2</sup>                |
| Carrier gas                                         | 0.8 (MFC1) +0.3 (MFC2) L/min Helium |
| Nitrogen                                            | 4 mL/min                            |
| Ablation style                                      | Line scan                           |
| Scan speed                                          | 3 µm/s                              |
| Spot size                                           | 30 µm                               |
| Repetition rate                                     | 5 Hz                                |

## References

Black, L.P., Kamo, S.L., Allen, C.M., Davis, D.W., Aleinikoff, J.N., Valley, J.W., Mundil, R., Campbell, I.H., Korsch, R.J., Williams, I.S., Foudoulis, C., 2004. Improved <sup>206</sup>Pb/<sup>238</sup>U microprobe geochronology by the monitoring of a trace-element-related matrix effect; SHRIMP, ID-TIMS, ELA-ICP-MS and oxygen isotope documentation for a series of zircon standards. *Chemical Geology* 205, 115-140.

Jackson, S. E., Pearson, N. J., Griffin, W. L., & Belousova, E. A. (2004). The application of laser ablation-inductively coupled plasma-mass spectrometry to in situ U–Pb zircon geochronology. *Chemical Geology* 211, 47-69.

Schoene, B., Crowley, J.L., Condon, D.J., Schmitz, M.D., Bowring, S.A., 2006. Reassessing the uranium decay constants for geochronology using ID-TIMS U–Pb data. *Geochimica et Cosmochimica Acta* 70, 426-445.

Sláma, J., Košler, J., Condon, D.J., Crowley, J.L., Gerdes, A., Hanchar, J.M., Horstwood, M.S.A., Morris, G.A., Nasdala, L., Norberg, N., Schaltegger, U., Schoene, B., Tubrett, M.N., Whitehouse, M.J., 2008. Plešovice zircon — A new natural reference material for U–Pb and Hf isotopic microanalysis. *Chemical Geology* 249, 1-35.

Todd, C. N., Roberts, E. M., Knutsen, E. M., Rozefelds, A. C., Huang, H. Q., & Spandler, C. (2019). Refined age and geological context of two of Australia's most important Jurassic vertebrate taxa (*Rhoetosaurus brownei* and *Siderops kehli*), Queensland. *Gondwana Research*, 76, 19-25.

## Lu-Hf isotopic Analysis (UWA)

For comprehensive details of the Lu-Hf isotope analytical setup and data processing procedures employed at the University of Western Australia (UWA), see Petersson et al., 2019, 2020).

| ThermoScientific Neptune PLUS Multi-Collector Mass Spectrometer (LA-MC-ICP-MS) |                                     |
|--------------------------------------------------------------------------------|-------------------------------------|
| Forward power                                                                  | 1450 W                              |
| Plasma gas                                                                     | 15 L/ min Argon                     |
| Auxiliary gas                                                                  | 0.8 L/min Argon                     |
| Make-up gas                                                                    | 0.5 L/min Argon                     |
| Photon Machines Analyte.G2 193 nm ArF Excimer laser                            |                                     |
| Wavelength                                                                     | 193 nm                              |
| Pulse length                                                                   | < 5 ns                              |
| Energy density                                                                 | ~5 J/cm <sup>2</sup>                |
| Carrier gas                                                                    | 0.7 (MFC1) +0.3 (MFC2) L/min Helium |
| Nitrogen                                                                       | 9 mL/min                            |
| Scan speed                                                                     | n/a                                 |
| Spot size                                                                      | 40 to 50 $\mu$ m                    |
| Ablation duration                                                              | 60 s                                |
| Repetition rate                                                                | 4 Hz                                |

Ablation sites were selected to overlap those of the corresponding concordant U-Pb analysis for each zircon grain.

Corrections for isobaric interference of Lu and Yb on  $^{176}\text{Hf}$  were performed by monitoring  $^{175}\text{Lu}$  ( $^{176}\text{Lu}/^{175}\text{Lu} = 0.02655$ ) (Vervoort et al., 2004) and  $^{171}\text{Yb}$  ( $^{176}\text{Yb}/^{171}\text{Yb} = 0.897145$ ) (Segal et al., 2003). Yb isotope ratios were normalized to  $^{173}\text{Yb}/^{171}\text{Yb} = 1.130172$  (Segal et al., 2003). Hf isotope ratios ( $^{179}\text{Hf}/^{177}\text{Hf}$ ) were normalized to 0.7325 (Patchett and Tatsumoto, 1981), using an exponential law.

Uncertainties for reference and sample zircons are given at two standard errors and incorporate the reproducibility of the Mud Tank zircon analyses, added in quadrature. Four zircon references, Mud Tank (MTZ), FC-1, TEMORA 2 and 91500 were analysed concurrently with the unknowns to monitor instrumental accuracy and precision. Normalized (S1)  $^{176}\text{Hf}/^{177}\text{Hf}$  values for MTZ, FC-1 and 91500 were  $0.282488 \pm 14$ ,  $0.282181 \pm 19$ , and  $0.282311 \pm 24$  respectively. Normalized (S5)  $^{176}\text{Hf}/^{177}\text{Hf}$  values for MTZ, FC-1 and TEMORA 2 were  $0.282494 \pm 13$ ,  $0.282175 \pm 19$  and  $0.282693 \pm 19$  respectively.

The solution  $^{176}\text{Hf}/^{177}\text{Hf}$  value of FC-1 employed is  $0.282184 \pm 16$  (Woodhead and Hergt, 2005), and the solution  $^{176}\text{Hf}/^{177}\text{Hf}$  value of MTZ, to which all sample zircon analyses were normalized, is  $0.282507 \pm 6$  (Woodhead and Hergt, 2005). The solution  $^{176}\text{Hf}/^{177}\text{Hf}$  value of 91500 is 0.282306

$\pm 8$  (Woodhead and Hergt, 2005). The solution  $^{176}\text{Hf}/^{177}\text{Hf}$  value of TEMORA 2 is  $0.282686 \pm 8$  (Woodhead and Hergt, 2005).

Initial epsilon Hf values were calculated using the chondritic uniform reservoir (CHUR) parameters of Bouvier et al. (2008),  $^{176}\text{Hf}/^{177}\text{Hf} = 0.282725$  and  $^{176}\text{Lu}/^{177}\text{Hf} = 0.0336$  (Bouvier et al., 2008), and the  $^{176}\text{Lu}$  decay constant of  $1.867 \pm 0.008 \times 10^{-11} \text{ yr}^{-1}$  published by Söderlund et al. (2004).

## References

Bouvier, A., Vervoort, J.D., & Patchett, P.J. (2008). The Lu-Hf and Sm-Nd isotopic composition of CHUR: constraints from unequilibrated chondrites and implication for the bulk composition of terrestrial planets. *Earth and Planetary Science Letters*, 273, 48-57.

Kemp, A. I. S., Hawkesworth, C. J., Collins, W. J., Gray, C. M., & Blevin, P. L. (2009). Isotopic evidence for rapid continental growth in an extensional accretionary orogen: The Tasmanides, eastern Australia. *Earth and Planetary Science Letters*, 284, 455-466.

Næraa, T., Scherstén, A., Rosing, M. T., Kemp, A. I. S., Hoffmann, J. E., Kokfelt, T. F., & Whitehouse, M. J. (2012). Hafnium isotope evidence for a transition in the dynamics of continental growth 3.2 Gyr ago. *Nature*, 485, 627-630.

Patchett, P.J., and Tatsumoto, M. (1981). A routine high-precision method for Lu-Hf isotope geochemistry and chronology. *Contributions to Mineralogy and Petrology*, 75, 263-267.

Petersson, A., Kemp, A.I.S., Gray, C.M., and Whitehouse, M.J. (2020). Formation of early Archaean Granite-Greenstone Terranes from a globally chondritic mantle: Insights from igneous rocks of the Pilbara Craton, Western Australia. *Chemical Geology* 511, 119757.

Petersson, A., Kemp, A.I.S., Hickman, A.H., Whitehouse, M.J., Martin, L., and Gray, C.M. (2019). A new 3.59 Ga magmatic suite and a chondritic source to the east Pilbara Craton. *Chemical Geology*, 511, 51-70.

Segal, I., Halicz, L., and Platzner, I.T. (2003). Accurate isotope ratio measurements of ytterbium by multiple collection inductively coupled plasma mass spectrometry applying erbium and hafnium in an improved double external normalization procedure. *Journal of Analytical Atomic Spectrometry*, 18, 1217-1223.

Söderlund, U., Patchett, J.P., Vervoort, J.D., and Isachsen, C.E. (2004). The  $^{176}\text{Lu}$  decay constant determined by Lu-Hf and U-Pb isotope systematics of Precambrian mafic intrusions. *Earth and Planetary Science Letters*, 219, 311-324.

Vervoort, J.D., Patchett, J.P., Söderlund, U., and Baker, M. (2004). Isotopic composition of Yb and the determination of Lu concentrations and Lu/Hf ratios by isotope dilution using MC-ICPMS. *Geochemistry, Geophysics, Geosystems*, 5.

Woodhead, J.D., and Hergt, J.M. (2005). A preliminary appraisal of seven natural zircon reference materials for in-situ Hf isotope determination. *Geostandards and Geoanalytical Research*, 29, 183-195.



## Lu-Hf isotopic Analysis (JCU)

For comprehensive details of the Lu-Hf isotope analytical setup and data processing procedures employed at James Cook University (JCU), see Kemp et al. (2009), Næraa et al. (2012) and Tucker et al. (2016).

| ThermoScientific Neptune Plasma Multi-Collector Mass Spectrometer (LA-MC-ICP-MS) |                                     |
|----------------------------------------------------------------------------------|-------------------------------------|
| Forward power                                                                    | 1450 W                              |
| Plasma gas                                                                       | 15 L/ min Argon                     |
| Auxiliary gas                                                                    | 0.8 L/min Argon                     |
| Make-up gas                                                                      | 0.5 L/min Argon                     |
| Photon Machines Analyte.G2 193 nm ArF Excimer laser                              |                                     |
| Wavelength                                                                       | 193 nm                              |
| Pulse length                                                                     | < 5 ns                              |
| Energy density                                                                   | ~3 J/cm <sup>2</sup>                |
| Carrier gas                                                                      | 0.8 (MFC1) +0.3 (MFC2) L/min Helium |
| Nitrogen                                                                         | 4 mL/min                            |
| Scan speed                                                                       | 3 µm/s                              |
| Spot size                                                                        | 50 µm                               |
| Ablation duration                                                                | 60 s                                |
| Time between analyses                                                            | 60s                                 |
| Repetition rate                                                                  | 4 Hz                                |

Ablation sites were selected to overlap those of the corresponding concordant U-Pb analysis for each zircon.

Corrections for isobaric interference of Lu and Yb on <sup>176</sup>Hf were performed by monitoring <sup>175</sup>Lu (<sup>176</sup>Lu/<sup>175</sup>Lu = 0.026549) (Vervoort et al., 2004) and <sup>171</sup>Yb (<sup>176</sup>Yb/<sup>171</sup>Yb = 0.897145) (Segal et al., 2003). Yb isotope ratios were normalized to <sup>173</sup>Yb/<sup>171</sup>Yb = 1.130172 (Segal et al., 2003). Hf isotope ratios (<sup>179</sup>Hf/<sup>177</sup>Hf) were normalized to 0.7325 (Patchett and Tatsumoto, 1981).

Mass bias was corrected by exponential law (Fisher et al., 2011). Lu-Hf datasets were subsequently processed offline.

Measured average <sup>176</sup>Hf/<sup>177</sup>Hf from four zircon standards, Mud Tank (MTZ), FC-1, Plešovice and 91500 were analysed concurrently with the unknowns to monitor instrumental accuracy and precision (Fisher et al., 2014). Uncertainties for unknowns and standards are given at two standard deviations. Four zircon references, Mud Tank (MTZ), FC-1, Plešovice and 91500 were analysed concurrently with the unknowns to monitor instrumental accuracy and precision. Normalized (S2) <sup>176</sup>Hf/<sup>177</sup>Hf values for MTZ and FC-1 were 0.282494 ± 11 and 0.282183 ± 11 respectively.

Normalized (S3)  $^{176}\text{Hf}/^{177}\text{Hf}$  values for MTZ, FC-1 and Plešovice were  $0.282509 \pm 15$ ,  $0.282166 \pm 24$  and  $0.282478 \pm 22$  respectively. Normalized (S4)  $^{176}\text{Hf}/^{177}\text{Hf}$  values for MTZ, FC-1, 91500 and Plešovice were  $0.282505 \pm 15$ ,  $0.282173 \pm 25$ ,  $0.282285 \pm 28$  and  $0.282478 \pm 22$  respectively.

The solution  $^{176}\text{Hf}/^{177}\text{Hf}$  value of FC-1 employed is  $0.282184 \pm 16$  (Woodhead and Hergt, 2005), and the solution  $^{176}\text{Hf}/^{177}\text{Hf}$  value of MTZ, to which all unknown analyses were normalized, is  $0.282507 \pm 6$  (Woodhead and Hergt, 2005). The solution  $^{176}\text{Hf}/^{177}\text{Hf}$  value of 91500 is  $0.282306 \pm 8$  (Woodhead and Hergt, 2005) and the solution  $^{176}\text{Hf}/^{177}\text{Hf}$  value of Plešovice is  $0.282482 \pm 13$  (Sláma et al., 2008).

Based on average  $^{176}\text{Hf}/^{177}\text{Hf}$  MTZ values for each session, an individual normalization factor (calculated using the average  $^{176}\text{Hf}/^{177}\text{Hf}$  value of MTZ relative for each session relative to the solution value) was applied to the unknown analyses (Fisher et al., 2014). Constants employed in these calculations were the chondritic uniform reservoir (CHUR)  $^{176}\text{Hf}/^{177}\text{Hf}$  value of 0.282725 and the  $^{176}\text{Lu}/^{177}\text{Hf}$  value of 0.0336 (Bouvier et al., 2008), and the  $^{176}\text{Lu}$  decay constant of  $1.867 \pm 0.008 \times 10^{-11} \text{ yr}^{-1}$  published by Söderlund et al. (2004). Given  $\epsilon\text{Hf}$  uncertainties in unknown analyses encompass analytical/instrumental drift errors added in quadrature with the reproducibility of MTZ.

Spurious results, such as those described below, were excluded from further interpretation.

- with uncertainties/errors  $> 1.5 \epsilon\text{Hf}$  units
- with  $\epsilon\text{Hf}$  unit values which plotted above the depleted mantle (DM) line
- with  $\text{Lu}^{176}/\text{Hf}^{177}$  ratios  $> 0.003$ , indicating a high REE content. As a high REE zircon standard (e.g. R33) was not employed, any interference correction applied may have been insufficient.

## References

- Bouvier, A., Vervoort, J.D., & Patchett, P.J. (2008). The Lu-Hf and Sm-Nd isotopic composition of CHUR: constraints from unequilibrated chondrites and implication for the bulk composition of terrestrial planets. *Earth and Planetary Science Letters*, 273, 48-57.
- Fisher, C. M., Vervoort, J. D., & DuFrane, S. A., 2014, Accurate Hf isotope determinations of complex zircons using the “laser ablation split stream” method. *Geochemistry, Geophysics, Geosystems*, 15(1), 121–139.
- Kemp, A. I. S., Hawkesworth, C. J., Collins, W. J., Gray, C. M., & Blevin, P. L. (2009). Isotopic evidence for rapid continental growth in an extensional accretionary orogen: The Tasmanides, eastern Australia. *Earth and Planetary Science Letters*, 284, 455-466.
- Næraa, T., Scherstén, A., Rosing, M. T., Kemp, A. I. S., Hoffmann, J. E., Kokfelt, T. F., & Whitehouse, M. J. (2012). Hafnium isotope evidence for a transition in the dynamics of continental growth 3.2 Gyr ago. *Nature*, 485, 627-630.

Patchett, P.J., and Tatsumoto, M. (1981). A routine high-precision method for Lu-Hf isotope geochemistry and chronology. *Contributions to Mineralogy and Petrology*, 75, 263-267.

Segal, I., Halicz, L., and Platzner, I.T. (2003). Accurate isotope ratio measurements of ytterbium by multiple collection inductively coupled plasma mass spectrometry applying erbium and hafnium in an improved double external normalization procedure. *Journal of Analytical Atomic Spectrometry*, 18, 1217-1223.

Sláma, J., Košler, J., Condon, D.J., Crowley, J.L., Gerdes, A., Hanchar, J.M., Horstwood, M.S.A., Morris, G.A., Nasdala, L., Norberg, N., Schaltegger, U., Schoene, B., Tubrett, M.N., Whitehouse, M.J., 2008. Plešovice zircon — A new natural reference material for U–Pb and Hf isotopic microanalysis. *Chemical Geology* 249, 1-35.

Söderland, U., Patchett, J.P., Vervoort, J.D., and Isachsen, C.E. (2004). The  $^{176}\text{Lu}$  decay constant determined by Lu-Hf and U-Pb isotope systematics of Precambrian mafic intrusions. *Earth and Planetary Science Letters*, 219, 311-324.

Tucker, R. T., Roberts, E. M., Henderson, R. A., & Kemp, A. I. (2016). Large igneous province or long-lived magmatic arc along the eastern margin of Australia during the Cretaceous? Insights from the sedimentary record. *Bulletin*, 128, 1461-1480.

Vervoort, J.D., Patchett, J.P., Söderland, U., and Baker, M. (2004). Isotopic composition of Yb and the determination of Lu concentrations and Lu/Hf ratios by isotope dilution using MC-ICPMS. *Geochemistry, Geophysics, Geosystems*, 5.

Woodhead, J.D., and Hergt, J.M. (2005). A preliminary appraisal of seven natural zircon reference materials for in-situ Hf isotope determination. *Geostandards and Geoanalytical Research*, 29, 183-195.
