# Supplementary material
Source: publisher figshare collection journal article supplement (https://gsapubs.figshare.com/articles/dataset/_/14925234)
Supplement: Supplementary file 5 [file 1]

## **Jurassic Arc: Reconstructing the lost world of eastern Gondwana**

Elliot.K. Foley\*, R.A. Henderson, E.M. Roberts, A.I.S. Kemp, C.N. Todd, E.M. Knutsen, C. Fisher, C.C. Wainman and Carl Spandler.

Department of Geosciences, James Cook University Townsville, Queensland 4811, Australia

\*E-mail contact: [elliott.foley@my.jcu.edu.au](mailto:elliott.foley@my.jcu.edu.au)

### **SUPPLEMENTARY PAPERS**

*Geology* (2021)

---

#### **SUPPLEMENTARY PAPERS**

**Supplementary file A.** List of samples used for U-Pb geochronology in this study (PDF).

**Supplementary file B.** U-Pb geochronological datasets (Excel file).

**Supplementary file C.** List of samples used for Lu-Hf analysis in this study (PDF).

**Supplementary file D.** Lu-Hf isotope analytical datasets (Excel file).

**Supplementary file E.** Analytical setup and procedures used (PDF).

**Supplementary file F.** Crustal addition rate calculations (PDF).

**Supplementary file G.** Supplementary Figure 1. Plotted  $\epsilon\text{Hf}$  data with isotopic evolution curves (PDF).

**SUPPLEMENTARY DATA** (# corresponds to number of analyses accepted and used in this study)

| Sample Name | #   | Coordinates (WGS84) |               | Sample Type |         | Well Name        | Depth (m) | Basin             | Formation                 | Reference           |
|-------------|-----|---------------------|---------------|-------------|---------|------------------|-----------|-------------------|---------------------------|---------------------|
|             |     | Lat.                | Long.         | Core        | Outcrop |                  |           |                   |                           |                     |
| PGF01       | 89  | 20.335259° S        | 144.469013° E |             | X       | -                | -         | Galilee Basin     | Porcupine Gorge Formation |                     |
| H7B59       | 68  | 20.950001° S        | 144.183329° E | X           |         | Hughenden 7      | 198.0     | Eromanga Basin    | Hooray Sandstone          |                     |
| H7B66       | 73  | 20.950001° S        | 144.183329° E | X           |         | Hughenden 7      | 230.0     | Eromanga Basin    | Injune Creek Group        |                     |
| H7B55       | 86  | 20.950001° S        | 144.183329° E | X           |         | Hughenden 7      | 184.0     | Eromanga Basin    | Gilbert River Formation   |                     |
| MMD-19-001  | 135 | 23.629325° S        | 50.370667° E  |             | X       | -                | -         | Surat Basin       | Razorback Beds            |                     |
| QMF7882     | 52  | 24.470004° S        | 150.699994° E |             | X       | -                | -         | Surat Basin       | Evergreen Formation       | Todd et al. (2019)  |
| QMF1659     | 69  | 24.626003° S        | 149.742999° E |             | X       | -                | -         | Surat Basin       | Walloon Coal Measures     | Todd et al. (2019)  |
| MV1         | 100 | 25.740955° S        | 152.468957° E |             | X       | -                | -         | Nambour Basin     | Myrtle Creek Sandstone    |                     |
| MV2         | 125 | 25.750250° S        | 152.368119° E |             | X       | -                | -         | Nambour Basin     | Myrtle Creek Sandstone    |                     |
| NM2         | 97  | 26.546349° S        | 153.102650° E |             | X       | -                | -         | Nambour Basin     | Myrtle Creek Sandstone    |                     |
| NM3         | 114 | 26.380030° S        | 153.099495° E |             | X       | -                | -         | Nambour Basin     | Myrtle Creek Sandstone    |                     |
| NM5         | 79  | 26.671758° S        | 153.109686° E |             | X       | -                | -         | Nambour Basin     | Myrtle Creek Sandstone    |                     |
| DINO_TRACK  | 119 | 20.143116° S        | 143.640990° E |             | X       | -                | -         | Eromanga Basin    | Blantyre Sandstone        |                     |
| 081018-6    | 102 | 14.893964° S        | 143.974568° E | X           |         | Lakefield 1      | 389.5     | Laura Basin       | Gilbert River Formation   |                     |
| 101018-2    | 89  | 19.295442° S        | 140.381436° E | X           |         | Dobbyn 1         | 35.3      | Carpentaria Basin | Normanton Formation       |                     |
| 101018-4    | 84  | 14.535470° S        | 143.862274° E | X           |         | Ebagoola 1       | 339.5     | Laura Basin       | Gilbert River Formation   |                     |
| RP1-DZ-UGR  | 112 | 15.656832° S        | 141.856686° E | X           |         | Rutland Plains 1 | 1005.5    | Carpentaria Basin | Gilbert River Formation   | Foley et al. (2021) |

|                 |     |              |               |   |   |                 |        |                   |                         |                       |
|-----------------|-----|--------------|---------------|---|---|-----------------|--------|-------------------|-------------------------|-----------------------|
| W1-DZ-UGR       | 129 | 12.785066° S | 142.404824° E | X |   | Weipa 1         | 429.6  | Carpentaria Basin | Gilbert River Formation | Foley et al. (2021)   |
| 101018-34       | 91  | 17.715162° S | 141.034461° E | X |   | Normanton 1     | 94.8   | Carpentaria Basin | Normanton Formation     |                       |
| 081018-12       | 96  | 14.737267° S | 143.919729° E | X |   | Breeza Plains 1 | 495.0  | Laura Basin       | Dalrymple Sandstone     |                       |
| Top Middle Loth | 103 | 19.742728° S | 143.630618° E |   | X | -               | -      | Carpentaria Basin | Loth Formation          |                       |
| McKinlay-02     | 63  | 21.592507° S | 142.259717° E | X |   | McKinlay-1      | 9.3    | Eromanga Basin    | Winton Formation        | Tucker et al. (2016)  |
| McKinlay-16     | 63  | 21.592507° S | 142.259717° E | X |   | McKinlay-1      | 54.0   | Eromanga Basin    | Winton Formation        | Tucker et al. (2016)  |
| HadesHill       | 40  | 23.016288° S | 142.411865° E |   | X | -               | -      | Eromanga Basin    | Winton Formation        | Tucker et al. (2016)  |
| ERU             | 73  | 23.016288° S | 142.411865° E |   | X | -               | -      | Eromanga Basin    | Winton Formation        | Tucker et al. (2016)  |
| BBD4            | 81  | 22.514825° S | 143.038857° E |   | X | -               | -      | Eromanga Basin    | Winton Formation        | Tucker et al. (2016)  |
| Blackall-02     | 61  | 24.162590° S | 144.223606° E | X |   | Blackall 2      | 27.0   | Eromanga Basin    | Winton Formation        | Tucker et al. (2016)  |
| ERO1            | 92  | 26.614710° S | 143.880111° E | X |   | Eromanga 1      | 20.0   | Eromanga Basin    | Winton Formation        | Tucker et al. (2016)  |
| ISIS            | 60  | 24.259307° S | 144.441483° E |   | X | -               | -      | Eromanga Basin    | Winton Formation        | Tucker et al. (2016)  |
| Longmac1        | 64  | 23.111931° S | 144.599555° E | X |   | Longreach 1     | 27.0   | Eromanga Basin    | Mackunda Formation      | Tucker et al. (2016)  |
| Maneroo-331     | 82  | 23.385865° S | 144.467891° E | X |   | Maneroo 1       | 343.0  | Eromanga Basin    | Mackunda Formation      | Tucker et al. (2016)  |
| MV6             | 85  | 25.925457° S | 152.432065° E |   | X | -               | -      | Nambour Basin     | Tiaro Coal Measures     |                       |
| MV4             | 120 | 25.556158° S | 152.460068° E |   | X | -               | -      | Nambour Basin     | Tiaro Coal Measures     |                       |
| MV15            | 5   | 25.551132° S | 152.509764° E |   | X | -               | -      | Maryborough Basin | Grahams Creek Formation |                       |
| MV16            | 77  | 25.551491° S | 152.509175° E |   | X | -               | -      | Maryborough Basin | Grahams Creek Formation |                       |
| MV17            | 59  | 25.559521° S | 152.598749° E |   | X | -               | -      | Maryborough Basin | Grahams Creek Formation |                       |
| 2550367         | 55  | 28.044004° S | 141.961701° E | X |   | Zeus 7          | 1667.5 | Eromanga Basin    | Birkhead Formation      | Wainman et al. (2018) |
| 2550364         | 57  | 28.044004° S | 141.961701° E | X |   | Zeus 7          | 1659.3 | Eromanga Basin    | Birkhead Formation      | Wainman et al. (2018) |
| Base Hampstead  | 102 | 19.885314° S | 143.602908° E |   | X | -               | -      | Carpentaria Basin | Hampstead Sandstone     | Foley et al. (2020)   |
| Base Upper Loth | 114 | 19.742728° S | 143.630618° E |   | X | -               | -      | Carpentaria Basin | Loth Formation          | Foley et al. (2020)   |
| Base Yappar     | 113 | 19.845448° S | 143.646430° E |   | X | -               | -      | Carpentaria Basin | Gilbert River Formation | Foley et al. (2020)   |

|                  |     |              |               |   |   |                  |        |                   |                         |                     |
|------------------|-----|--------------|---------------|---|---|------------------|--------|-------------------|-------------------------|---------------------|
| Base Lower Loth  | 100 | 19.857875° S | 143.643210° E |   | X | -                | -      | Carpentaria Basin | Loth Formation          | Foley et al. (2020) |
| Base Middle Loth | 72  | 19.742553° S | 143.622213° E |   | X | -                | -      | Carpentaria Basin | Loth Formation          | Foley et al. (2020) |
| D1-DZ-GR         | 80  | 19.295442° S | 140.381436° E | X |   | Dobbyn 1         | 589.5  | Carpentaria Basin | Gilbert River Formation | Foley et al. (2021) |
| 031019-3         | 96  | 15.656832° S | 141.856686° E | X |   | Rutland Plains 1 | 1088.0 | Carpentaria Basin | Gilbert River Formation | Foley et al. (2021) |
| 031019-6         | 118 | 12.785066° S | 142.404824° E | X |   | Weipa 1          | 519.9  | Carpentaria Basin | Gilbert River Formation | Foley et al. (2021) |
| 031019-7         | 99  | 12.785066° S | 142.404824° E | X |   | Weipa 1          | 568.6  | Carpentaria Basin | Garraway Sandstone      | Foley et al. (2021) |
| 031019-13        | 57  | 19.295442° S | 140.381436° E | X |   | Dobbyn 1         | 44.7   | Carpentaria Basin | Normanton Formation     |                     |
| 041019-1         | 84  | 15.656832° S | 141.856686° E | X |   | Rutland Plains 1 | 351.1  | Carpentaria Basin | Normanton Formation     |                     |
| 041019-4         | 88  | 15.656832° S | 141.856686° E | X |   | Rutland Plains 1 | 270.4  | Carpentaria Basin | Normanton Formation     |                     |
| 041019-6         | 100 | 19.295442° S | 140.381436° E | X |   | Dobbyn 1         | 580.7  | Carpentaria Basin | Gilbert River Formation | Foley et al. (2021) |
| 041019-8         | 99  | 19.295442° S | 140.381436° E | X |   | Dobbyn 1         | 559.1  | Carpentaria Basin | Gilbert River Formation | Foley et al. (2021) |
| 041019-9         | 92  | 19.295442° S | 140.381436° E | X |   | Dobbyn 1         | 550.8  | Carpentaria Basin | Gilbert River Formation | Foley et al. (2021) |
| 081018-2         | 56  | 16.485452° S | 139.520874° E | X |   | Mornington 1     | 139.6  | Carpentaria Basin | Normanton Formation     |                     |
| 081018-1         | 85  | 14.893964° S | 143.974568° E | X |   | Lakefield 1      | 566.9  | Laura Basin       | Dalrymple Sandstone     |                     |
| 081019-3         | 27  | 17.715162° S | 141.034461° E | X |   | Normanton 1      | 630.5  | Carpentaria Basin | Gilbert River Formation |                     |
| 081019-5         | 48  | 17.715162° S | 141.034461° E | X |   | Normanton 1      | 606.5  | Carpentaria Basin | Gilbert River Formation |                     |
| 091019-1         | 8   | 17.715162° S | 141.034461° E | X |   | Normanton 1      | 114.3  | Carpentaria Basin | Normanton Formation     |                     |
| 091019-3         | 91  | 17.715162° S | 141.034461° E | X |   | Normanton 1      | 22.2   | Carpentaria Basin | Normanton Formation     |                     |
| 101018-14        | 91  | 14.535470° S | 143.862274° E | X |   | Ebagoola 1       | 896.2  | Laura Basin       | Dalrymple Sandstone     |                     |
| 101018-27        | 64  | 15.656832° S | 141.856686° E | X |   | Rutland Plains 1 | 1078.1 | Carpentaria Basin | Gilbert River Formation | Foley et al. (2021) |
| 101018-36        | 68  | 14.634593° S | 143.876096° E | X |   | Marina 1         | 187.5  | Laura Basin       | Rolling Downs Group     |                     |
| 121018-1         | 44  | 12.785066° S | 142.404824° E | X |   | Weipa 1          | 581.4  | Carpentaria Basin | Garraway Sandstone      | Foley et al. (2021) |
| 121018-7         | 131 | 12.785066° S | 142.404824° E | X |   | Weipa 1          | 392.3  | Carpentaria Basin | Rolling Downs Group     | Foley et al. (2021) |
| Top Hampstead    | 100 | 19.857875° S | 143.643210° E |   | X | -                | -      | Carpentaria Basin | Hampstead Sandstone     | Foley et al. (2020) |

|                |     |              |               |   |   |             |       |                   |                           |                     |
|----------------|-----|--------------|---------------|---|---|-------------|-------|-------------------|---------------------------|---------------------|
| Top Upper Loth | 139 | 19.845448° S | 143.646430° E |   | X | -           | -     | Carpentaria Basin | Loth Formation            | Foley et al. (2020) |
| Top Lower Loth | 128 | 19.742553° S | 143.622213° E |   | X | -           | -     | Carpentaria Basin | Loth Formation            | Foley et al. (2020) |
| W1-DZ-LGS      | 90  | 12.785066° S | 142.404824° E | X |   | Weipa 1     | 573.6 | Carpentaria Basin | Garraway Sandstone        | Foley et al. (2021) |
| BGR            | 94  | 20.403973° S | 144.437436° E |   | X | -           | -     | Eromanga Basin    | Blantyre Sandstone        |                     |
| BSS-2004       | 87  | 20.374497° S | 144.454432° E |   | X | -           | -     | Eromanga Basin    | Blantyre Sandstone        |                     |
| Dalrymple Hons | 117 | 15.288330° S | 145.215559° E |   | X | -           | -     | Laura Basin       | Dalrymple Sandstone       |                     |
| GRF01          | 79  | 20.408712° S | 144.436754° E |   | X | -           | -     | Eromanga Basin    | Blantyre Sandstone        |                     |
| H5B5           | 52  | 20.633335° S | 144.399996° E | X |   | Hughenden 5 | 53.5  | Eromanga Basin    | Blantyre Sandstone        |                     |
| H5B21          | 83  | 20.633335° S | 144.399996° E | X |   | Hughenden 5 | 105.0 | Eromanga Basin    | Blantyre Sandstone        |                     |
| H6B8           | 90  | 20.346885° S | 144.53219° E  | X |   | Hughenden 6 | 41.0  | Eromanga Basin    | Blantyre Sandstone        |                     |
| H6B26          | 68  | 20.346885° S | 144.53219° E  | X |   | Hughenden 6 | 120.0 | Galilee Basin     | Warang Sandstone          |                     |
| H6B38          | 22  | 20.346885° S | 144.53219° E  | X |   | Hughenden 6 | 169.0 | Galilee Basin     | Warang Sandstone          |                     |
| H6B47          | 92  | 20.346885° S | 144.53219° E  | X |   | Hughenden 6 | 199.0 | Galilee Basin     | Porcupine Gorge Formation |                     |
| H7B101         | 93  | 20.950001° S | 144.183329° E | X |   | Hughenden 7 | 341.0 | Eromanga Basin    | Hutton Sandstone          |                     |
| Wall 1         | 77  | 20.408701° S | 144.436611° E |   | X | -           | -     | Eromanga Basin    | Gilbert River Formation   |                     |
| WSS-Top        | 81  | 20.351433° S | 144.466663° E |   | X | -           | -     | Galilee Basin     | Warang Sandstone          |                     |
| WSS-0409       | 93  | 20.335468° S | 144.469125° E |   | X | -           | -     | Galilee Basin     | Warang Sandstone          |                     |
| WSS-2908       | 94  | 20.335350° S | 144.469088° E |   | X | -           | -     | Galilee Basin     | Warang Sandstone          |                     |

## References

Foley, E.K., Baty, M., Knusten, E.M., Lignum, J.S., and Roberts, E.M., 2020, Jurassic-Early Cretaceous paleogeography and paleoenvironments of the north-eastern margin of Gondwana: Insights from the Carpentaria Basin, Australia: Gondwana Research, v. 88, p. 126-149, doi.org/10.1016/j.gr.2020.07.003.

Foley, E. K., Roberts, E. M., Knutsen, E. M., and Hannaford, C., 2021, Cryptic Middle to Late Jurassic marine incursions into northeastern Gondwana: An integrated sedimentological, ichnological and geochronological approach: *Palaeogeography, Palaeoclimatology, Palaeoecology*, v. 569, 110330, doi.org/10.1016/j.palaeo.2021.110330

Todd, C.N., Roberts, E.M., Knutsen, E.M., Rozefelds, A.C., Huang, H.Q., and Spandler, C., 2019, Refined age and geological context of two of Australia's most important Jurassic vertebrate taxa (*Rhoetosaurus brownie* and *Siderops kehli*), Queensland: *Gondwana Research*, v. 76, p. 19-25, doi.org/10.1016/j.gr.2019.05.008

Tucker, R.T., Roberts, E.M., Henderson, R.A., and Kemp, A.I.S., 2016, Large igneous province or long-lived magmatic arc along the eastern margin of Australia during the Cretaceous? Insights from the sedimentary record: *Bulletin of the Geological Society of America*, v. 128, p. 1461–1480, doi:10.1130/B31337.1.10.1130

Wainman, C. C., McCabe, P. J., and Crowley, J. L., 2018, Solving a tuff problem: Defining a chronostratigraphic framework for Middle to Upper Jurassic nonmarine strata in eastern Australia using uranium–lead chemical abrasion–thermal ionization mass spectrometry zircon dates: *AAPG Bulletin*, v. 102, p. 1141-1168, doi.org/10.1306/07261717140
